# Supplementary material for: Pharmacist-led medication management services: a qualitative exploration of transition-of-care cardiovascular disease patient experiences
Source: PubMed Central journal article supplement — BMJ Open. 2024 May 22;14(5):e082228. doi: 10.1136/bmjopen-2023-082228 (PMC11116877; doi:10.1136/bmjopen-2023-082228), 2024-05-22
Supplement: bmjopen-2023-082228.draft_revisions.pdf [file bmjopen-2023-082228.draft_revisions.pdf]

# BMJ Open

BMJ Open is committed to open peer review. As part of this commitment we make the peer review history of every article we publish publicly available.

When an article is published we post the peer reviewers' comments and the authors' responses online. We also post the versions of the paper that were used during peer review. These are the versions that the peer review comments apply to.

The versions of the paper that follow are the versions that were submitted during the peer review process. They are not the versions of record or the final published versions. They should not be cited or distributed as the published version of this manuscript.

BMJ Open is an open access journal and the full, final, typeset and author-corrected version of record of the manuscript is available on our site with no access controls, subscription charges or pay-per-view fees (<http://bmjopen.bmj.com>).

If you have any questions on BMJ Open's open peer review process please email [info.bmjopen@bmj.com](mailto:info.bmjopen@bmj.com)

# BMJ Open

## Pharmacist-Led Medication Management Services: A Qualitative Exploration of Cardiovascular Disease Patient Experiences

|                               |                                                                                                                                                                                                                                                                                                                                                                                                                                                                                                                                                                                                                                                                                                                                                                                                                                                                                                                                                                                                                                                                                                                                                                                                                 |
|-------------------------------|-----------------------------------------------------------------------------------------------------------------------------------------------------------------------------------------------------------------------------------------------------------------------------------------------------------------------------------------------------------------------------------------------------------------------------------------------------------------------------------------------------------------------------------------------------------------------------------------------------------------------------------------------------------------------------------------------------------------------------------------------------------------------------------------------------------------------------------------------------------------------------------------------------------------------------------------------------------------------------------------------------------------------------------------------------------------------------------------------------------------------------------------------------------------------------------------------------------------|
| Journal:                      | <i>BMJ Open</i>                                                                                                                                                                                                                                                                                                                                                                                                                                                                                                                                                                                                                                                                                                                                                                                                                                                                                                                                                                                                                                                                                                                                                                                                 |
| Manuscript ID                 | bmjopen-2023-082228                                                                                                                                                                                                                                                                                                                                                                                                                                                                                                                                                                                                                                                                                                                                                                                                                                                                                                                                                                                                                                                                                                                                                                                             |
| Article Type:                 | Original research                                                                                                                                                                                                                                                                                                                                                                                                                                                                                                                                                                                                                                                                                                                                                                                                                                                                                                                                                                                                                                                                                                                                                                                               |
| Date Submitted by the Author: | 17-Nov-2023                                                                                                                                                                                                                                                                                                                                                                                                                                                                                                                                                                                                                                                                                                                                                                                                                                                                                                                                                                                                                                                                                                                                                                                                     |
| Complete List of Authors:     | <p>Bennetts, Joshua; The University of Newcastle, School of Biomedical Sciences and Pharmacy; Hunter Medical Research Institute</p> <p>White, Jennifer; Hunter Medical Research Institute; The University of Newcastle, School of Medicine and Public Health</p> <p>Croft, Hayley; The University of Newcastle, School of Biomedical Sciences and Pharmacy</p> <p>Cooper, Joyce; The University of Newcastle, School of Biomedical Sciences and Pharmacy; James Cook University, College of Medicine and Dentistry</p> <p>McIvor, Dawn; The University of Newcastle, College of Health, Medicine, and Wellbeing; Hunter New England Local Health District, Cardiovascular Department</p> <p>Eadie, Nicholas; Hunter New England Local Health District, Department of Pharmacy</p> <p>Appay, Marcelle; The University of Newcastle, School of Biomedical Sciences and Pharmacy; Hunter New England Local Health District, Department of Pharmacy</p> <p>L Sverdlov, Aaron; The University of Newcastle, School of Medicine and Public Health; Hunter Medical Research Institute</p> <p>Ngo, Doan; The University of Newcastle, School of Biomedical Sciences and Pharmacy; Hunter Medical Research Institute</p> |
| Keywords:                     | Medication Adherence, CARDIOLOGY, Health Education                                                                                                                                                                                                                                                                                                                                                                                                                                                                                                                                                                                                                                                                                                                                                                                                                                                                                                                                                                                                                                                                                                                                                              |
|                               |                                                                                                                                                                                                                                                                                                                                                                                                                                                                                                                                                                                                                                                                                                                                                                                                                                                                                                                                                                                                                                                                                                                                                                                                                 |

SCHOLARONE™  
Manuscripts

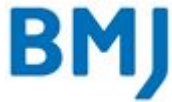

I, the Submitting Author has the right to grant and does grant on behalf of all authors of the Work (as defined in the below author licence), an exclusive licence and/or a non-exclusive licence for contributions from authors who are: i) UK Crown employees; ii) where BMJ has agreed a CC-BY licence shall apply, and/or iii) in accordance with the terms applicable for US Federal Government officers or employees acting as part of their official duties; on a worldwide, perpetual, irrevocable, royalty-free basis to BMJ Publishing Group Ltd ("BMJ") its licensees and where the relevant Journal is co-owned by BMJ to the co-owners of the Journal, to publish the Work in this journal and any other BMJ products and to exploit all rights, as set out in our [licence](#).

The Submitting Author accepts and understands that any supply made under these terms is made by BMJ to the Submitting Author unless you are acting as an employee on behalf of your employer or a postgraduate student of an affiliated institution which is paying any applicable article publishing charge ("APC") for Open Access articles. Where the Submitting Author wishes to make the Work available on an Open Access basis (and intends to pay the relevant APC), the terms of reuse of such Open Access shall be governed by a Creative Commons licence – details of these licences and which [Creative Commons](#) licence will apply to this Work are set out in our licence referred to above.

Other than as permitted in any relevant BMJ Author's Self Archiving Policies, I confirm this Work has not been accepted for publication elsewhere, is not being considered for publication elsewhere and does not duplicate material already published. I confirm all authors consent to publication of this Work and authorise the granting of this licence.

1  
2  
3  
4 1 ***Pharmacist-Led Medication Management Services: A Qualitative Exploration***  
5  
6 2 ***of Cardiovascular Disease Patient Experiences***  
7

8 3 Joshua Bennetts<sup>1,2</sup>, Jennifer White<sup>2,3</sup>, Hayley Croft<sup>1</sup>, Joyce Cooper<sup>1,4</sup>, Dawn McIvor<sup>5,6</sup>,  
9 4 Nicholas Eadie<sup>7</sup>, Marcelle Appay<sup>1,7</sup>, Aaron Sverdlov<sup>2,3,6</sup>, Doan Ngo<sup>1,2</sup>  
10  
11  
12 5

- 13  
14 6 1. School of Biomedical Science and Pharmacy, The University of Newcastle,  
15 7 Callaghan, NSW 2308, Australia  
16 8 2. Hunter Medical Research Institute, New Lambton Heights, NSW 2305, Australia  
17 9 3. School of Medicine and Public Health, The University of Newcastle, Callaghan, NSW  
18 10 2308, Australia  
19 11 4. College of Medicine and Dentistry, James Cook University, Townsville, QLD 4810,  
20 12 Australia  
21 13 5. College of Health, Medicine, and Wellbeing, The University of Newcastle, Callaghan,  
22 14 NSW 2308, Australia  
23 15 6. Cardiovascular Department, John Hunter Hospital, Hunter New England Local Health  
24 16 District, New Lambton Heights, NSW 2305, Australia  
25 17 7. Department of Pharmacy, John Hunter Hospital, Hunter New England Local Health  
26 18 District, New Lambton Heights, NSW 2305, Australia  
27  
28  
29  
30  
31 19  
32

33 20 **Corresponding Author:**

34 21 Doan Ngo

35 22 Lot 1, Kookaburra Circuit, New Lambton Heights, New South Wales, 2305, Australia

36 23 [doan.ngo@newcastle.edu.au](mailto:doan.ngo@newcastle.edu.au)  
37  
38  
39  
40  
41  
42  
43  
44  
45  
46  
47  
48  
49  
50  
51  
52  
53  
54  
55  
56  
57  
58  
59  
60

1  
2  
3 24 **Keywords**  
4  
5

6 25 Pharmacist; Medication Reconciliation; Cardiovascular Disease; Hospital to Home  
7  
8 26 Transition; Medication Review  
9  
10  
11  
12  
13

14 28 **Abstract**

**Word Count: 256**

15  
16 29 **Objective** Hospitalisation due to medication-related problems is a major health concern,  
17  
18 30 particularly for those with pre-existing, or at high-risk of developing, cardiovascular disease  
19  
20 31 (CVD). Post-discharge medication reviews (PDMRs) may form a core component of  
21  
22 32 reducing hospital readmissions due to medication-related problems. This study aimed to  
23  
24 33 explore CVD patients' perspective of, and experiences with, pharmacist-led medication  
25  
26 34 management services. A secondary aim explored attitudes towards availability of PDMRs.  
27  
28  
29  
30

31 35 **Design** An interpretative qualitative study involving 16 semi-structured interviews. Data  
32  
33 36 were analysed using an inductive thematic approach.  
34  
35  
36

37 37 **Setting** CVD patients discharged to a community setting from the John Hunter Hospital, an  
38  
39 38 820-bed tertiary referral hospital based in New South Wales, Australia.  
40  
41  
42

43 39 **Participants** Patients with pre-existing or newly diagnosed CVD recently discharged from  
44  
45 40 hospital.  
46  
47  
48

49 41 **Results** A total of 16 interviews were conducted to reach thematic saturation. 9 Participants  
50  
51 42 (56%) were male. Mean age of participants was 57.5 ( $\pm$ 13.2) years. Three emergent themes  
52  
53 43 were identified: (i) Poor medication understanding impacts transition from hospital to home;  
54  
55 44 (ii) Factors influencing medication concordance following discharge, and (iii) Perceived  
56  
57 45 benefits of routine post-discharge medication reviews.  
58  
59  
60

1  
2  
3 46 **Conclusions** There is a clear need to further improve the quality use of medicines and  
4  
5 47 health literacy of transition-of-care CVD patients. Pharmacists are suitable to provide  
6  
7 48 essential and tailored medication review services to CVD patients as part of their  
8  
9 49 multidisciplinary healthcare team. The implementation of routine, pharmacist led PDMRs  
10  
11 50 may be a feasible means of providing patients with access to health education following their  
12  
13 51 transition from hospital back to community, improving their health literacy and reducing re-  
14  
15 52 hospitalisations due to medication-related issues.  
16  
17  
18  
19  
20  
21  
22

### 23 54 **Article Summary: Strengths and Limitations of This Study**

- 24  
25  
26 55 1. Hospitalisation due to medication-related problems is a global health concern. Post-  
27  
28 56 discharge medication reviews may form a core component of reducing hospital  
29  
30 57 readmissions due to medication-related problems. Limited research focussing on the  
31  
32 58 perspectives of primary consumers has been conducted and thus this study aims to fill an  
33  
34 59 existing knowledge gap.  
35  
36  
37 60 2. The strength of this study lies in the exploration of a heterogenous sample of people with  
38  
39 61 chronic cardiovascular disease across their transition-of-care.  
40  
41  
42 62 3. The mean age of participants was relatively young and may therefore underestimate the  
43  
44 63 need for post-discharge medication reviews in ‘older’ adults (adults over the age of 65  
45  
46 64 years).  
47  
48  
49 65 4. There is a relative lack in representation from cultural and linguistically diverse patients.  
50  
51 66 5. Potential reporting bias: responding participants may have had different experiences to  
52  
53 67 non-responders, including access to primary care where differing models of care exist.  
54  
55  
56  
57  
58  
59  
60

## 70 Introduction

Word Count: 4655

71 Cardiovascular disease (CVD) is a leading cause of death and disability in Australia. In 2021  
72 alone, CVD was the underlying cause of death in 42,700 individuals, representing 25% of all  
73 deaths. During this same year, coronary heart disease was the leading single cause of death in  
74 Australia, accounting for 17,300 deaths, being 10% of all deaths and 41% of CVD deaths.<sup>1</sup>  
75 Internationally, medication-related issues are a common contributor to hospitalisations and  
76 mortality for CVD patients who often have a high drug burden consisting of multiple  
77 medications and complex dosing regimens.<sup>2</sup> This is compounded in patients with poor health  
78 literacy: the inability to understand and act on medical information.<sup>3</sup>

79  
80 Rehospitalisation due to poor medication management presents as a significant issue for  
81 cardiology patients, who have been shown to have an increased likelihood of hospital  
82 readmission by 28% in the following month.<sup>4</sup> Poor medication concordance is closely  
83 associated with adverse outcomes in CVD patients of whom many are elderly and take 5 or  
84 more medications.<sup>5</sup> Poor medication concordance, use of harmful medications and  
85 withdrawal of beneficial medications have been identified as precipitating factors for 20% of  
86 heart failure (HF) hospitalisations.<sup>6</sup> Patients with poor medication concordance also have  
87 36% higher mortality from ischemic heart disease, and a 2-fold increased risk of mortality  
88 from cerebral haemorrhage and cerebral infarction than those with good concordance.<sup>7</sup>

89  
90 Internationally, the provision of pharmacist-led medication reconciliation programs during  
91 hospital transitions have been established as a means for improving post-hospital healthcare  
92 utilisation.<sup>8-11</sup> Growing evidence highlights that comprehensive medication reviews improve  
93 health literacy, and reduce the number of medication-related errors and inappropriate use of

1  
2  
3 94 medicines.<sup>12-17</sup> In Australia, medication review services were first introduced for residents of  
4  
5 95 aged care facilities in 1997, expanded to include those living in a community setting in  
6  
7 96 2001,<sup>18, 19</sup> and further revised in 2020, to include referrals from hospital-based medical  
8  
9  
10 97 practitioners. The latest amendment enables the initiation of comprehensive medication  
11  
12 98 reviews through hospital networks along with the allowance for pharmacist-initiated follow-  
13  
14 99 up reviews; promoting a patient-centred cycle-of-care whereby pharmacists are directly  
15  
16  
17 100 involved in the follow-up of medication-specific problems.  
18  
19  
20 101  
21  
22

23 102 To date, previous research has explored pharmacist and general practitioner (GP)  
24  
25 103 perspectives of comprehensive medication reviews, including more recently pharmacist  
26  
27 104 perspectives on the implementation of post-discharge medication reviews (PDMRs).<sup>20-25</sup>  
28  
29 105 There remains a lack of evidence relating to patient perspectives on PDMRs, particularly  
30  
31 106 those with existing CVD or those who are at high-risk of CVD complications. Patient  
32  
33 107 perspectives are invaluable in assessing the effectiveness of healthcare service  
34  
35 108 implementations aimed at improving health literacy and self-management. Some research  
36  
37 109 exploring pharmacist-led medication reconciliation reviews suggesting there is improved  
38  
39 110 health literacy and sustained self-management upon returning to a community setting in  
40  
41 111 CVD patients who receive pharmacist intervention.<sup>26, 27</sup> To our knowledge, this is the first  
42  
43 112 study exploring these perspectives of transition-of-care CVD patients and their experiences  
44  
45 113 with pharmacist-led medication management services. We aimed to explore the experiences  
46  
47 114 of patients during their transition-of-care (ToC) from hospital to home probing their  
48  
49 115 understanding of medication-related changes and subsequent medicine review referral.  
50  
51  
52  
53  
54  
55  
56 116  
57  
58  
59 117  
60



## 118 **Method**

### 119 *Study Design, Participant Selection and Recruitment*

120 An interpretive qualitative approach was deemed appropriate to explore our research  
121 question. Patient and public involvement was not deemed necessary for the design and  
122 implementation of this study. Participants were recruited from the John Hunter Hospital  
123 (JHH): a major referral hospital for the Hunter New England Local Health District  
124 (HNELHD) servicing over 920,000 people. Patients meeting our inclusion criteria (see **Figure**  
125 **1**) being discharged from the JHH with either newly diagnosed or pre-existing CVD were  
126 identified by and invited to participate by cardiology nurses and pharmacists from the  
127 cardiology ward and cardiac rehabilitation clinic (CRC) at the JHH. Potential participants  
128 were provided with detailed study information and had the opportunity to ask questions about  
129 the research. All participants provided informed consent. Interviews were conducted between  
130 Dec 2022 and July 2023. This study employed the use of semi-structured interviews and was  
131 informed by the COnsolidated criteria for REporting Qualitative research (COREQ)  
132 checklist.<sup>28</sup> Approval for this project was obtained from the Hunter New England Health  
133 Human Research Ethics Committee (Reference Number: 2022/ETH00872).

134

### 135 *Data Collection and Analysis*

136 Semi-structured telephone interviews (n=16), ranging from 30-60 minutes, were conducted  
137 by a member of the research team (JB) at a mutually convenient time between 1<sup>st</sup> September  
138 2022 and 30<sup>th</sup> September 2023. Interviews were audio recorded with the participant's consent  
139 and transcribed *ad verbatim* by JB with all identifying data removed. Guided by an interview  
140 schedule, questions aimed to probe participant experiences of their recent hospitalisation  
141 experiences and subsequent implementation and management of medications, as well as

1  
2  
3 142 attitudes towards pharmacist-led medication management services including availability of  
4  
5 143 PDMR services. Identified themes informed continuing data collection and sampling  
6  
7 144 continued until thematic saturation (two co-coders agreeing that no new themes were  
8  
9 145 emerging) was achieved. Coding was performed independently by two authors (JB, JW),  
10  
11 146 following an inductive thematic approach.<sup>29</sup> Analysis followed a three-phase approach: (i)  
12  
13 147 initial familiarisation of the data following a systematic identification of salient themes within  
14  
15 148 each interview transcript; (ii) generation of a coding scheme with distinct boundaries linked  
16  
17 149 to sections of the written transcript; (iii) collation of codes into larger themes by examining  
18  
19 150 relationships between each code. Transcripts were coded line-by-line, describing, and  
20  
21 151 interpreting emerging categories and searching for differences and similarities. The next step  
22  
23 152 involved examining the relationship between categories in the context of the research  
24  
25 153 question to form themes. Consistency of findings was upheld through immersion within the  
26  
27 154 data and peer debriefing with data coding reflexivity and discussion with the research team.<sup>30</sup>  
28  
29 155 <sup>31</sup> Coders captured exemplar quotes supporting each theme.  
30  
31  
32  
33  
34  
35  
36  
37  
38

## 39 157 **Results**

40  
41  
42 158 A total of 18 participants provided written informed consent to be interviewed, with 16  
43  
44 159 completing the interview process. One participant declined the interview and another  
45  
46 160 participant passed away prior to being interviewed. Demographics for the 16 participants  
47  
48 161 (mean age 57.5 (13.2) years, 9 (56%) male) are shown in **Figure 2**.  
49  
50  
51

52 162 Three emergent themes were identified:  
53  
54

- 55 163 (i) *Poor medication understanding impacts transition from hospital to home;*  
56  
57 164 (ii) *Factors influencing medication concordance following discharge, and*  
58  
59 165 (iii) *Perceived benefits of routine PDMRs*

166

1. *Poor medication understanding impacts transition from hospital to home*

Many participants reported difficulty comprehending health-related information during their hospital admission including understanding the cause of their cardiovascular event, subsequent medication changes, and the lifestyle changes recommended following their discharge. Participants reflected on their feelings of anxiety and being overwhelmed in response to the experience of a life-threatening cardiovascular event. Participants reportedly attributed anxiety with difficulties in comprehending the initiation of, or changes to, medications during their acute hospital admission.

“[It’s] obviously a very stressful situation I was in, being so young and having a cardiac thing go on. So, I didn’t take everything in those first couple of days.” (P1)

“Because when you’re in hospital and they’re telling you what tablets to take, you’re going ‘okay, there’s just so much going on in hospital’. Yeah, it’s not until you get home that you think ‘okay, what was that all about?’. It was just a whirlwind I went through”. (P4)

181

Participants reported that understanding copious amounts of new medication-related information was more difficult to comprehend whilst trying to grasp the extensiveness of medications now required.

“...so, they gave me a week’s medication from the pharmacy at the hospital and this big, two A4 sheets of all the tablets that you get. I go ‘oh s\*\*t’ because you don’t know this. I’m going to check-out, and they go ‘oh, here are all your tablets’ and I go ‘oh s\*\*t, look at all this!’”. (P5)

189

1  
2  
3 190 Participants' understanding of their medication regime were experienced on a spectrum  
4  
5 191 where some readily grasped changes with new information while other struggled. Difficulty  
6  
7 192 understanding was compounded among participants who had no prior experience with taking  
8  
9 193 regular medications.

10  
11  
12  
13 194 "My big problem—like, I've never had anything before—is knowing what all these  
14  
15 195 tablets do...you know nothing, you're learning it all". (P5)

16  
17  
18 196  
19  
20 197 Participants recounted varying experiences with education during their hospital admission.  
21  
22 198 Most participants reported they received a combination of verbal and/or written medication  
23  
24 199 instructions during their hospitalisation or at discharge. Participants valued staff who took  
25  
26 200 the time to explain their medication regime and "were nice enough to write down" (P4) or  
27  
28 201 provide written information. Information sources included physicians, nurses, and  
29  
30 202 pharmacists; although some participants reported they were unsure as to who provided the  
31  
32 203 information.

33  
34  
35  
36  
37 204 "Hang on, well I know when I was [in hospital], the last doctor I'd seen there, he  
38  
39 205 explained to me all the way through me tablets: 'when you leave hospital, take so  
40  
41 206 and so and so, then take another tablet', and it was all written out for me". (P17)

42  
43  
44  
45 207 "I mean, ...there was a person, or some nurse, or doctor came around and explained  
46  
47 208 the situation". (P5)

48  
49  
50 209  
51  
52 210 However, other participants commented on the lack of information provision during their  
53  
54 211 admission and the limited reinforcement of what medication to take and why, especially  
55  
56 212 during medication rounds. Participants' reports suggested they were passive during  
57  
58 213 medication rounds and only a few pressed staff for information. Many participants perceived

1  
2  
3 214 limited education was due to staff time constraints and being unable to take time to engage  
4  
5  
6 215 and deliver education in an impactful manner.

7  
8 216 “None really. It was just, I guess, the nurses coming and saying either ‘this is due’ or  
9  
10 217 ‘how are you feeling? Do you need pain relief?’”. (P9)

11  
12  
13 218 “...you know, when you’re in hospital, it’s so busy, full-on. The doctors and nurses are  
14  
15 219 running from patient-to-patient. So, there’s not a lot of time to actually sit and really  
16  
17 220 talk about medications and sort of similar things like that”. (P6)

18  
19  
20 221  
21  
22  
23 222 Participants’ reports suggested the negative impact of receiving differing information from  
24  
25 223 multiple sources. Some participants reported a lack of consistency between staff members  
26  
27 224 which accentuated anxiety and confusion.

28  
29  
30 225 “So, I guess it’s probably a little bit of anxiousness where you get little snippets of  
31  
32 226 information...you’ve got no idea...like when you’re in hospital, because you have all  
33  
34 227 different doctors at different particular times, I think it’s because the message isn’t  
35  
36 228 coming from the one person all the time. Like it’s coming from various different  
37  
38 229 people”. (P7)

39  
40  
41 230  
42  
43  
44  
45 231 Many participants described the difficulties engaging with self-management education when  
46  
47 232 they felt unwell, distracted by an unfamiliar environment, or were focussed on “wanting to  
48  
49 233 get home”. (P5)

50  
51  
52  
53 234 “The thing is, you’ve been sick in hospital, you don’t think. So, your mind’s all  
54  
55 235 muddled up or you go ‘whatever, I don’t want to listen to you’”. (P17)

56  
57  
58 236  
59  
60

1  
2  
3 237 Being a passive recipient of medications in hospital alongside struggling to understand a new  
4  
5 238 medication regime reportedly impacted participants confidence to manage their medications  
6  
7  
8 239 on discharge. Participants reported that they were most unsure during the first few weeks  
9  
10 240 post-discharge as they attempted to establish routines with either taking medications for the  
11  
12 241 first time or implementing a new medication regimen.

13  
14  
15 242 “But at the time it’s a bit like, I’m a bit confused about what is what, going through  
16  
17 243 boxes and reading my list. So yeah, the first few weeks was a bit confusing with what  
18  
19  
20 244 I was taking”. (P4)  
21  
22

23 245  
24  
25  
26 246 While some participants reported ongoing feelings of anxiety and being overwhelmed by  
27  
28 247 a lack of familiarity with medication terminology and understanding the purpose of their  
29  
30 248 medication, others took on the role of educating themselves. For many this involved  
31  
32 249 online searching or talking to family member who were health professionals, especially  
33  
34  
35 250 when experiencing side effects.  
36  
37

38 251 “I came home without too much insight into what they [medications] are and that sort  
39  
40 252 of thing. It’s been kind of left up to my own accord to basically prepare myself”. (P9)  
41  
42

43 253 “I asked my sister – she’s a cardiothoracic nurse – so I asked her, you know, side  
44  
45 254 effects I was having that I got on the weekend”. (P2)  
46  
47

48 255  
49

## 50 51 256 *2. Factors influencing medication concordance following discharge*

### 52 53 54 257 *Discharge home*

55  
56  
57 258 For many participants the reality of needing to take life-saving medication became apparent  
58  
59 259 on return home when they were confronted with the seriousness of the situation and the need

1  
2  
3 260 to develop new daily medication routines. Many were grateful they were on sick leave or  
4  
5 261 had time post-discharge to establish a routine including being mindful of when medications  
6  
7  
8 262 needed to be taken and if they needed to be taken with meals or not.  
9

10 263 “And generally, I get up at the same time each day. Having said that, I am on sick  
11  
12 264 leave at the moment. So that will take time and breakfast will change when I go  
13  
14  
15 265 back to work. But that’s down the track management”. (P1)  
16  
17

18 266  
19  
20

21 267 For participants, especially those without prior experience with taking medication,  
22  
23 268 remembering to administer doses, manage prescriptions and medication supply, and follow-  
24  
25 269 up appointments with GPs whilst balancing prior commitments with family or work was an  
26  
27  
28 270 additional burden.  
29

30  
31 271 “I’m just a really busy person. I work full-time and then I’ve got two kids. So, by  
32  
33 272 having to throw medication in on that...I guess it’s like when you’re a new person to  
34  
35 273 start taking medication...you’ve got to take the medication seriously. And I’m the sort  
36  
37  
38 274 of person who, like, I know I’ve got to take it but I’m just, like, busy. Like it’s not the  
39  
40 275 first thing that’s on my mind which is not good. I need to change that”. (P7)  
41  
42

43 276  
44  
45

#### 46 277 *Cardiac Rehabilitation* 47

48  
49 278 Several participants reported they continued to lack understanding of their medication  
50  
51 279 regime, which was apparent when engaging with other health professionals such as dentists  
52  
53  
54 280 or rehabilitation therapists.  
55

56  
57 281 “I even went to the dentist, and they said: ‘what are you on, we need to update your  
58  
59 282 records’, and I didn’t even know”. (P9)  
60

1  
2  
3 283 “I was just at Cardio Rehab [CRC]...and they asked me if I was on a beta-blocker,  
4  
5 284 and I actually didn’t know what a beta-blocker was. I was, like, not sure!”. (P7)  
6  
7  
8  
9 285

10  
11 286 Nine participants were recruited through the CRC at the JHH and reported increased  
12  
13 287 accessibility and reinforcement of medication information through the clinic. Participation in  
14  
15 288 the CRC provided participants with an opportunity for further engagement with specialists  
16  
17 289 in cardiology and ask questions or raise concerns related to medications or management of  
18  
19 290 their CVD.  
20  
21  
22

23  
24 291 “I actually had a chat with one of the nurses at rehab today, and I was going to have a  
25  
26 292 chat with one of the guys at the pharmacy but I though I’m at rehab today, I’ll chat  
27  
28 293 with them about the cholesterol medication I’m on”. (P6)  
29  
30  
31 294

32  
33  
34 295 *External support*  
35  
36

37 296 Many participants relied on others to help manage their medications and adhere to them, be  
38  
39 297 that family members, carers, or community pharmacists. While this was most evident in the  
40  
41 298 weeks following discharge, others reported an ongoing reliance on family members or  
42  
43 299 carers. As such, some participants acknowledged they had less opportunity to engage with  
44  
45 300 community pharmacists for ongoing education, information, or intervention if necessary.  
46  
47  
48

49 301 “Just take them when I’m supposed to take them. My son sort of gets them out and  
50  
51 302 gives them to me, and I just take them as I’m supposed to. I’m a bit foggy at the  
52  
53 303 moment, but he’s looking after it. I’ll have to get more involved very shortly”. (P15)  
54  
55  
56  
57  
58  
59  
60



1  
2  
3 304 “Because say I say to my wife “I’m too sick to get my tablets today, can you pick  
4  
5 305 them up for me”? So, if someone else goes and picks up your tablets for you, you  
6  
7 306 don’t have any interaction with the pharmacist.” (P5)  
8  
9

10  
11 307

12  
13  
14 308 *Community care*

15  
16 309 Participants readily identified the importance of community pharmacies managing their  
17  
18  
19 310 prescriptions and medications, including use dose administration aids.  
20  
21

22 311 “So obviously looking at things of whether Webster-paks® or blister packs —  
23  
24 312 pre-made medications — that sort of thing as well I think is really important.”  
25  
26 313 (P1)  
27  
28

29  
30 314

31  
32 315 However, some participants acknowledge that by relying on an external source there was the  
33  
34 316 potential for error or oversight if they weren’t familiar with changes to their medications.  
35  
36

37 317 “I gave my prescriptions actually to the pharmacist. They know what they’re doing,  
38  
39 318 and I don’t have to worry about it. You don’t have to think about sitting at the table  
40  
41  
42 319 and dividing them all up and hoping that they’re not all wrong...which has happened a  
43  
44 320 couple of times. I’ve gone a couple of weeks without realising I wasn’t taking one  
45  
46 321 particular [medication]”. (P18)  
47  
48  
49

50 322

51  
52 323 Participants who followed through with an appointment to see their GP on discharge  
53  
54 324 indicated the benefit in gaining further understanding of their recent hospitalisation and  
55  
56 325 medication changes, including accessing new prescriptions.  
57  
58  
59  
60

1  
2  
3 326 “I was told to go to my GP a week after which I did yesterday...she reinforced what  
4  
5 327 [medications] they had sent me home with”. (P11)  
6  
7

8 328  
9  
10 329 Overall, participants reported a wide range of challenges attempting to implement a  
11  
12 330 medication regime on discharge. Many participants were not supplied with sufficient  
13  
14 331 medication quantities on discharge to see them through to their follow-up GP appointment,  
15  
16 332 who were often required to wait several weeks.  
17  
18

19  
20 333 “...because my GP is booked out that far ahead, I’m looking at two to three weeks.  
21  
22 334 When I rang up to say that I need an appointment to arrange some medications after I  
23  
24 335 had a heart attack, they had to put me on an emergency waiting list, and even then, it  
25  
26 336 took them seven days to get me in.” (P3)  
27  
28

29  
30 337  
31  
32  
33 338 Younger participants were reportedly confronted with the concept of taking multiple  
34  
35 339 medications and some were reluctant to use dose administration aids which they associated  
36  
37 340 with ‘older people’.  
38  
39

40 341 “And for me, personally, I still consider myself still fairly young, and I think this [dose  
41  
42 342 administration aids] is an old person’s thing. So, getting your head around it all, you  
43  
44 343 know, it’s a little new”. (P2)  
45  
46  
47

48 344  
49  
50  
51 345 Many participants commented on the benefit of accessing a community pharmacist for  
52  
53 346 medication-related information and health advice prior to escalating any concerns to their GP.  
54  
55

56 347 “I’m wary about that. I wouldn’t go and pick up a multivitamin or something without  
57  
58 348 talking to the Chemist: ‘this is what I take. Could there be any interactions?’” (P12)  
59  
60

1  
2  
3 349 “Because sometimes it’s hard to get into see your GP. And sometimes it’s not  
4  
5 350 necessary to see your GP. I feel that [the community pharmacist] is the ‘first port-of-  
6  
7  
8 351 call’; unless you’re really, really sick.” (P6)  
9

10 352  
11  
12  
13 353 Conversations with a community pharmacist on discharge home provided many participants  
14  
15  
16 354 with the reassurance they needed to better manage their medications. However, some  
17  
18 355 participants reported they were reticent to speak to their community pharmacist due to  
19  
20 356 privacy concerns associated with discussing personal medical information in public or being  
21  
22 357 a burden when the pharmacist was perceived to be “busy”. (P11)  
23  
24  
25

26 358 “But what I really hate when I go to the chemist is when you first give them the  
27  
28 359 script and it’s the first time you’re getting it back, they want to talk to you — and  
29  
30 360 there are so many people around...and I actually feel uncomfortable talking about  
31  
32 361 that in front of other people...it’s probably not actually sinking in because I’m like  
33  
34 362 ‘who’s standing behind me, is there someone here that I know’ you know? And I  
35  
36 363 think that’s probably why I didn’t know a lot about my medications. I was just like  
37  
38 364 ‘yep, yep’; do you know what I mean?”. (P7)  
39  
40  
41  
42  
43  
44

45 366 For some participants, accessing a community pharmacist and pharmacy services centred  
46  
47 367 around medication cost whereby participants would seek multiple pharmacies to obtain the  
48  
49 368 best price for their medications. Participants acknowledged this had potential to impact  
50  
51 369 continuity of care facilitated by seeing the same pharmacist.  
52  
53  
54

55 370 “So, we try to keep costs down where we can...at least by going to that [discount  
56  
57 371 pharmacy] kind of thing, we are trying to keep costs down. But in a way of a  
58  
59 372 relationship, I wouldn’t know any of the people in there”. (P9)  
60

1  
2  
3 373  
4  
56 374 3. *Perceived benefits of routine PDMRs*  
7

8  
9 375 Most participants acknowledged the importance of taking responsibility for their  
10  
11 376 medications. However, all participants could foresee circumstances where the availability of  
12  
13  
14 377 PDMRs would prove beneficial.

15  
16 378 “I think it [post-discharge medicines reviews] would be really valuable. For me who’s  
17  
18 379 never really taken any medication, you know, it’s all a bit daunting all of a sudden  
19  
20  
21 380 having to take medication”. (P2)

22  
23  
24 381 “As a nurse, there a lot of people out there who have no clue what their medication are  
25  
26 382 or how they should be working, or when they should be taking them. So, I can see the  
27  
28 383 benefits of it — even for myself”. (P16)

30  
31  
32 384

33  
34  
35 385 Participants reported that PDMR would provide the opportunity for a tailored provision of  
36  
37 386 information. Some participants suggested incorporating a ‘triage’ system to account for each  
38  
39 387 patient’s individual social situation and educational needs, along with assessing those who  
40  
41 388 may be at high-risk for medication misadventure.

42  
43  
44 389 “There could be benefits from them [post-discharge medication reviews] that you  
45  
46 390 don’t see until you actually have someone come to have a look. I think that you would  
47  
48 391 probably ideally... make contact with a person in hospital, so you understand what  
49  
50 392 they’re circumstances are. And then you could make the decision from there. It’s very  
51  
52 393 person-orientated”. (P12)

53  
54  
55  
56  
57  
58  
59  
60

1  
2  
3 394 "...then maybe from that phone call going "okay you sound really stressed about your  
4  
5 395 medication we'll try and squeeze you in tomorrow" ...I guess maybe, like, a phone  
6  
7 396 call to kinda like 'triage' how urgently they need it". (P1)  
8  
9

10  
11 397

12  
13 398 The option for a PDMR with a pharmacist was perceived as a means of easing the anxiety  
14  
15 399 experienced during and after discharge home. Participants reported that PDMR would  
16  
17 400 benefit transition back into a community setting to monitor, reinforce information and  
18  
19 401 provide reassurance and support. Similarly, participants perceived that receiving a PDMR at  
20  
21 402 home gave them time to process their hospitalisation and any changes implemented, which  
22  
23 403 might raise issues to be discussed.  
24  
25  
26

27  
28 404 "And also, when you're in the hospital, you might not be thinking of these things to  
29  
30 405 ask either because it's all new and stuff. So, by the time you get home you can all of a  
31  
32 406 sudden sit down and sort of absorb the information." (P2)  
33  
34

35  
36 407 "I would say within the week of coming home. I wouldn't leave it much later. Because  
37  
38 408 in that week, you're still feeling...like you feel quite safe while in hospital. But when  
39  
40 409 you come home, it's a little bit daunting." (P6)  
41  
42

43 410

44  
45  
46 411 Home visitation for a PDMR was also perceived to be more conducive for medication-  
47  
48 412 related education, away from the time pressures experienced of other settings.  
49  
50

51 413 "You're not in the pharmacy with people glaring at you thinking 'hurry, hurry up, get  
52  
53 414 out of the way'. And even you're not sitting in the doctor's surgery thinking 'I'm  
54  
55 415 getting charged for every 5 minutes I'm sitting here'". (P9)  
56  
57  
58  
59  
60

1  
2  
3 416 “And when you go to the GP, it’s very transactional. Like it’s just like you’re in, out,  
4  
5 417 they’re really busy to the point that you don’t feel confident that they really listen”.

6  
7  
8 418 (P7)

9  
10  
11 419

## 12 13 14 420 **Discussion**

### 15 16 17 421 *Summary of main findings*

18  
19  
20 422 Our study explored perspectives of CVD patients on their experiences with medication  
21  
22 423 management and pharmacist-led medication review services during their ToC, including  
23  
24 424 attitudes towards having access to PDRMs. Cardiology patients’ ToC following a hospital  
25  
26 425 admission is often associated with a period of vulnerability that may be ameliorated through  
27  
28 426 pharmacist medication reconciliation, especially in patients with CVD.<sup>32</sup> Our findings  
29  
30 427 identified that the hospital environment presented several challenges which impacted the  
31  
32 428 effective delivery of education for inpatients. Participants detailed difficulties understanding  
33  
34 429 and retaining medication-related information during admission for a significant health event.  
35  
36 430 Feelings of anxiety and being overwhelmed contributed to poor information retention and  
37  
38 431 meant participants returning home lacking confidence in managing their medications.  
39  
40  
41 432 Overall, while participants took time to establish a routine back home, many gradually  
42  
43 433 became confident and expressed value in a medication review to monitor and provide  
44  
45 434 support.

46  
47  
48  
49  
50 435

### 51 52 53 436 *Comparison with existing literature*

54  
55  
56 437 Existing literature highlights the impact of time pressures on the quality and efficacy of  
57  
58 438 hospital-delivered education for inpatients has been extensively covered in the available  
59  
60

1  
2  
3 439 evidence base.<sup>33-36</sup> In response patients may be less equipped to manage their medications on  
4  
5 440 discharge to a community setting, thus affecting their quality use of medicines (QUM) — the  
6  
7 441 safe, effective, and appropriate use of medicines — and increasing the risks of future  
8  
9  
10 442 hospitalisations.

11  
12  
13 443

14  
15  
16 444 Obtaining the patient perspective is a critically important phase of implementing new health  
17  
18 445 services. Our results provide the perspectives of CVD patients thus building on existing  
19  
20 446 literature.<sup>37</sup> For example, White et al (2012)<sup>38</sup> conducted a qualitative study that identified  
21  
22 447 four key benefits of medication reviews as perceived by patients eligible for these reviews:  
23  
24 448 (i) acquisition of personalised medication information and advice; (ii) reassurance regarding  
25  
26 449 medications and coordination of their care; (iii) feeling valued and cared for by a health care  
27  
28 450 provider; (iv) enhancing the patient-provider and pharmacist-GP relationships. Our study  
29  
30 451 mirrors these observations concerning the perceived benefits of PDMRs, particularly the  
31  
32 452 need for post-discharge follow-up and the reassurance that patients experience when  
33  
34 453 receiving pharmacist input into their care.  
35  
36  
37  
38  
39

40 454

41  
42 455 However, the White et al study identified patient concerns around the potential for  
43  
44 456 pharmacist medication reviews to be perceived as undermining the authority of the GP, thus  
45  
46 457 having a negative impact on the patient's relationship with their GP.<sup>38</sup> Participants in our  
47  
48 458 study did not share these same perspectives, and instead felt that PDMRs would have  
49  
50 459 potential to improve access to primary care post-discharge through pharmacists due to the  
51  
52 460 difficulties they experienced with accessing their GPs. Our study demonstrated PDMRs were  
53  
54 461 considered an opportunity to ask questions and more actively engage in education within the  
55  
56 462 security of their own home. We posit that PDMRs have the potential to bridge education  
57  
58  
59  
60

1  
2  
3 463 deficits that emerge on discharge home and promote communication between hospital and  
4  
5 464 community-based medical practitioners.  
6  
7

8  
9 465

10  
11 466 The timing of service provision is crucial to ensure that QUM is maintained, and the risk of  
12  
13 467 medication-related problems is minimised. Evidence detailing the incidence of medication-  
14  
15 468 related problems ranges from 18.4% two-weeks post-discharge through to 37.5% four weeks  
16  
17 469 post-discharge.<sup>39</sup> Recently Daliri et al demonstrated that pharmacy-led transitional care  
18  
19 470 education programs reduced the proportion of patients experiencing self-reported  
20  
21 471 medication-related problems four-weeks post discharge.<sup>40</sup> Participants in our study  
22  
23 472 highlighted their desire for early pharmacist follow-up, within the first seven days post-  
24  
25 473 discharge being the most common request. This demonstrates the importance of early post-  
26  
27 474 discharge follow-up to promote the safe and effective use of medicines for ToC patients.  
28  
29

30  
31  
32  
33 475

34  
35 476 Participants in the study experienced issues engaging with primary care once discharged  
36  
37 477 from hospital, with potential role for pharmacists to bridge this gap. GP access for  
38  
39 478 prescription resupply was the most common challenge experienced by participants when  
40  
41 479 returning home. The limited quantities of tablets provided to participants at the time of  
42  
43 480 discharge was sometimes insufficient to sustain them until their GP appointment. The  
44  
45 481 HNELHD is part of the NSW public health system which stipulates that take home supplies  
46  
47 482 of regular medications must not exceed 7 days' supply when discharged from hospital.<sup>41</sup>  
48  
49 483 Unfortunately, this restriction imposes significant challenges for patients discharged from  
50  
51 484 NSW public hospitals. This varies considerably to other states within Australia — for  
52  
53 485 example, both Queensland and Victorian public hospital networks allow a one-month supply  
54  
55  
56  
57  
58  
59  
60



1  
2  
3 486 of regular medications under the Pharmaceutical Benefits Scheme.<sup>42, 43</sup> Given that access to  
4  
5 487 a GP may be difficult on discharge due to lengthy wait times we advocate...  
6  
7

8 488  
9

10  
11 489 *Implications on future research and practice*  
12

13  
14 490 The strength of this study lies in the exploration of a heterogenous sample of cardiology  
15  
16 491 patients. We acknowledge that many patients were reflecting on the potential of a PDMR  
17  
18 492 rather than having received one. Our results provide a baseline understanding of the  
19  
20 493 perspectives of transition-of-care CVD patients in terms of the implementation of PDMRs.  
21  
22 494 Future research is needed to evaluate routine PDMRs for CVD patients to investigate the  
23  
24 495 acceptability of the service, but also its impact on key CVD outcome markers, including 30-  
25  
26 496 day hospital readmission rates and the incidence of major adverse cardiovascular events. In  
27  
28 497 addition, future research should explore the perspectives of cultural and linguistically diverse  
29  
30 498 patients and those residing in regional, rural, and remote localities.  
31  
32  
33  
34  
35

36 499

37  
38  
39 500 **Conclusion**  
40

41 501 Pharmacists are ideally positioned to assist CVD patients across their ToC journeys as part of  
42  
43 502 a broader MDT. PDMRs are viewed by transition-of-care CVD patients as an acceptable  
44  
45 503 means of improving their health literacy and QUM when transitioning from hospital back  
46  
47 504 home. Routine service implementation may address the patient's desire for post-discharge  
48  
49 505 follow-up and provision for education away from the busy hospital environment. Service  
50  
51 506 implementation may benefit from an initial 'triage' to individualise the delivery by assessing  
52  
53 507 the patient's own needs and expectations of the service, whilst screening for those who may  
54  
55 508 be at high-risk of medication misadventure.  
56  
57  
58  
59  
60

## 509 **Acknowledgements**

510 The authors would like to thank the participants for their time and willingness to partake in  
511 the interviews.

## 513 **Author Contributions**

514 Study design was conducted by JB, HC, JC, JW and DN. Interviews and interview  
515 transcription was performed by JB. Data analysis was completed by JB and JW. JB drafted  
516 the manuscript for publication and DN, HC, JW and JC contributed to the content and  
517 revision of the manuscript. Revisions, literature, and manuscript checking was managed by  
518 JB. All authors read and approved the final version.

## 520 **Funding**

521 J Bennetts is the recipient of an Australian Government Research Training Program  
522 Scholarship (University of Newcastle Vice-Chancellor's Scholarship) and would like to thank  
523 the Commonwealth of Australia for their financial contribution to this research. AL Sverdlov  
524 is supported by Heart Foundation Australia Future Leader Fellowships (Award IDs 101918 &  
525 106025). DTM Ngo is supported by the NSW Ministry of Health EMC Fellowship  
526 (Australia) and Heart Foundation Australia Future Leader Fellowship (Award ID 104814).  
527 This work is supported in part by the Piggotts Family Trust from the Hunter Medical  
528 Research Institute (DTMN, JB); Royal Australasian College of Physicians (RACP)  
529 Foundation Research Establishment Awards (ALS); NSW Ministry of Health Translational  
530 Research Grant (ALS) and John Hunter Hospital Charitable Trust Grants (ALS, JB).

1  
2  
3 531 **Ethics approval and consent to participate**  
4  
5

6 532 Ethics approval was received from Hunter New England Human Research Ethics Committee  
7  
8  
9 533 of Hunter New England Local Health District (Reference – 2022/ETH00872). All  
10  
11 534 participants provided written informed consent prior to conducting interviews.  
12  
13

14 535  
15

16  
17 536 **Competing interests**  
18

19  
20 537 JB is a credentialed pharmacist who can provide domiciliary medication management  
21  
22  
23 538 reviews funded by the Australian Government Department of Health and Aged Care.  
24  
25

26 539  
27  
28  
29  
30  
31  
32  
33  
34  
35  
36  
37  
38  
39  
40  
41  
42  
43  
44  
45  
46  
47  
48  
49  
50  
51  
52  
53  
54  
55  
56  
57  
58  
59  
60

540 **References**

- 541 1. Health Ato, Welfare. Heart, stroke and vascular disease: Australian facts. Canberra: AIHW; 2023.
- 542 2. Abolbashari M, Macaulay TE, Whayne TF, Mukherjee D, Saha S. Polypharmacy in cardiovascular
- 543 medicine: problems and promises! *Cardiovascular & Hematological Agents in Medicinal Chemistry*
- 544 (Formerly *Current Medicinal Chemistry-Cardiovascular & Hematological Agents*). 2017;15(1):31-9.
- 545 3. Mixon AS, Myers AP, Leak CL, Lou Jacobsen JM, Cawthon C, Goggins KM, et al. Characteristics
- 546 associated with postdischarge medication errors. *Mayo Clin Proc*. 2014;89(8):1042-51.
- 547 4. Organization WH. Medication without harm. World Health Organization; 2017.
- 548 5. Mastromarino V, Casenghi M, Testa M, Gabriele E, Coluccia R, Rubattu S, et al. Polypharmacy in
- 549 heart failure patients. *Current heart failure reports*. 2014;11(2):212-9.
- 550 6. Formiga F, Chivite D, Manito N, Casas S, Llopis F, Pujol R. Hospitalization due to acute heart
- 551 failure. Role of the precipitating factors. *Int J Cardiol*. 2007;120(2):237-41.
- 552 7. Kim S, Shin DW, Yun JM, Hwang Y, Park SK, Ko YJ, et al. Medication Adherence and the Risk of
- 553 Cardiovascular Mortality and Hospitalization Among Patients With Newly Prescribed
- 554 Antihypertensive Medications. *Hypertension*. 2016;67(3):506-12.
- 555 8. Mekonnen AB, McLachlan AJ, Jo-anne EB. Effectiveness of pharmacist-led medication
- 556 reconciliation programmes on clinical outcomes at hospital transitions: a systematic review and
- 557 meta-analysis. *BMJ open*. 2016;6(2):e010003.
- 558 9. Ramalho de Oliveira D, Brummel AR, Miller DB. Medication therapy management: 10 years of
- 559 experience in a large integrated health care system. *Journal of Managed Care Pharmacy*.
- 560 2010;16(3):185-95.
- 561 10. Lee E, Braund R, Tordoff J. Examining the first year of Medicines Use Review services provided by
- 562 pharmacists in New Zealand: 2008. *The New Zealand Medical Journal (Online)*. 2009;122(1293).
- 563 11. Blenkinsopp A, Bond C, Raynor DK. Medication reviews. *British journal of clinical pharmacology*.
- 564 2012;74(4):573-80.
- 565 12. Chen TF. Pharmacist-led home medicines review and residential medication management review:
- 566 the Australian model. *Drugs & aging*. 2016;33(3):199-204.
- 567 13. Renaudin P, Boyer L, Esteve MA, Bertault-Peres P, Auquier P, Honore S. Do pharmacist-led
- 568 medication reviews in hospitals help reduce hospital readmissions? A systematic review and
- 569 meta-analysis. *British journal of clinical pharmacology*. 2016;82(6):1660-73.
- 570 14. Burgess LH, Kramer J, Castelein C, Parra JM, Timmons V, Pickens S, et al. Pharmacy-Led
- 571 Medication Reconciliation Program Reduces Adverse Drug Events and Improves Satisfaction in a
- 572 Community Hospital. *HCA Healthc J Med*. 2021;2(6):411-21.
- 573 15. Abdulghani KH, Aseeri MA, Mahmoud A, Abulezz R. The impact of pharmacist-led medication
- 574 reconciliation during admission at tertiary care hospital. *International Journal of Clinical Pharmacy*.
- 575 2018;40(1):196-201.
- 576 16. Kramer J, Hayley Burgess L, Warren C, Schlosser M, Fraker S, Hamilton M. Impact of pharmacist-
- 577 led admission medication reconciliation on patient outcomes in a large health system. *Journal of*
- 578 *Patient Safety and Risk Management*. 2023;0(0):25160435231193584.
- 579 17. Tan JP, Cheng KKF, Siah RCJ. A systematic review and meta-analysis on the effectiveness of
- 580 education on medication adherence for patients with hypertension, hyperlipidaemia and diabetes.
- 581 *Journal of advanced nursing*. 2019;75(11):2478-94.
- 582 18. Pharmaceutical Society of Australia. Guidelines for pharmacists providing Residential Medication
- 583 Management Review (RMMR) and Quality Use of Medicines (QUM) services. 2011.
- 584 19. Australian Government. Third Community Pharmacy Agreement between The Commonwealth of
- 585 Australia and The Pharmacy Guild of Australia. In: Department of Health and Aged Care, editor.:  
586 Commonwealth of Australia; 2000.
- 587 20. Petra C, Laetitia H, Sim TF, Parsons R, Wright B, Sunderland B. Home medicines reviews and
- 588 residential medication management reviews in Western Australia. *International journal of clinical*
- 589 *pharmacy*. 2020;42(2):567-78.

- 1  
2  
3 590 21. Weir KR, Naganathan V, Bonner C, McCaffery K, Rigby D, McLachlan AJ, et al. Pharmacists' and  
4 591 older adults' perspectives on the benefits and barriers of Home Medicines Reviews—a qualitative  
5 592 study. *Journal of health services research & policy*. 2020;25(2):77-85.
- 6 593 22. Weir KR, Naganathan V, Rigby D, McCaffery K, Bonner C, Trevena L, et al. Home medicines  
7 594 reviews: a qualitative study of GPs' experiences. *Australian journal of primary health*. 2020;26(1):24-  
8 595 30.
- 9 596 23. Patounas M, Lau ET, Chan V, Rigby D, Kyle GJ, Khatri J, et al. Home medicines reviews: a national  
10 597 survey of Australian accredited pharmacists' health service time investment. *Pharmacy practice*.  
11 598 2021;19(3).
- 12 599 24. Spinks J, Birch S, Wheeler AJ, Nissen L, Freeman C, Thai T, et al. Provision of home medicines  
13 600 reviews in Australia: linking population need with service provision and available pharmacist  
14 601 workforce. *Australian Health Review*. 2020;44(6):973-82.
- 15 602 25. Angley M, Criddle D, Rigby D, Elliott RA, Phillips K, Penm J, et al. Hospital-initiated post-discharge  
16 603 medication reviews in Australia: expert opinion on the barriers and enablers to implementation.  
17 604 *Journal of Pharmacy Practice and Research*. 2022;52(6):446-53.
- 18 605 26. Cawthon C, Walia S, Osborn CY, Niesner KJ, Schnipper JL, Kripalani S. Improving Care Transitions:  
19 606 The Patient Perspective. *Journal of Health Communication*. 2012;17(sup3):312-24.
- 20 607 27. Parajuli DR, Franzon J, McKinnon RA, Shakib S, Clark RA. Role of the pharmacist for improving  
21 608 self-care and outcomes in heart failure. *Current heart failure reports*. 2017;14:78-86.
- 22 609 28. Tong A, Sainsbury P, Craig J. Consolidated criteria for reporting qualitative research (COREQ): a  
23 610 32-item checklist for interviews and focus groups. *International journal for quality in health care*.  
24 611 2007;19(6):349-57.
- 25 612 29. Braun V, Clarke V. Using thematic analysis in psychology. *Qualitative research in psychology*.  
26 613 2006;3(2):77-101.
- 27 614 30. Krefting L. Rigor in qualitative research: the assessment of trustworthiness. *Am J Occup Ther*.  
28 615 1991;45(3):214-22.
- 29 616 31. Pandit NR. The creation of theory: A recent application of the grounded theory method. *The*  
30 617 *qualitative report*. 1996;2(4):1-15.
- 31 618 32. Al Sattouf A, Farahat R, Khatri AA. Effectiveness of Transitional Care Interventions for Heart  
32 619 Failure Patients: A Systematic Review With Meta-Analysis. *Cureus*. 2022;14(9):e29726.
- 33 620 33. Deccache A, Aujoulat I. A European perspective: common developments, differences and  
34 621 challenges in patient education. *Patient Education and Counseling*. 2001;44(1):7-14.
- 35 622 34. Badiyepymaiejahromi Z, Isfahani S, Parandavar N, Koshkaki A. Nursing students' perspectives  
36 623 regarding challenges of patient education in clinical settings. *Bangladesh Journal of Medical Science*.  
37 624 2016;15:615-20.
- 38 625 35. Tsigas E, Panagopoulou E, Sevdalis N, Montgomery A, Benos A. The influence of time pressure on  
39 626 adherence to guidelines in primary care: an experimental study. *BMJ open*. 2013;3(4):e002700.
- 40 627 36. Cooper JM, Garrett T. Providing medicines information and education to hospital in-patients:  
41 628 patients' experiences and preferences. *Journal of Pharmacy Practice and Research*. 2014;44(4):213-  
42 629 9.
- 43 630 37. Australian Commission on Safety and Quality in Health Care. Patient-centred care: Improving  
44 631 quality and safety through partnerships with patients and consumers. Sydney: Australian  
45 632 Commission on Safety and Quality in Health Care,; 2011.
- 46 633 38. White L, Klinner C, Carter S. Consumer perspectives of the Australian Home Medicines Review  
47 634 Program: Benefits and barriers. *Research in Social and Administrative Pharmacy*. 2012;8(1):4-16.
- 48 635 39. Garcia-Caballos M, Ramos-Diaz F, Jimenez-Moleon JJ, Bueno-Cavanillas A. Drug-related problems  
49 636 in older people after hospital discharge and interventions to reduce them. *Age and ageing*.  
50 637 2010;39(4):430-8.
- 51 638 40. Daliri S, Hugtenburg JG, ter Riet G, van den Bemt BJB, Buurman BM, Scholte op Reimer WJM, et  
52 639 al. The effect of a pharmacy-led transitional care program on medication-related problems post-  
53 640 discharge: A before—After prospective study. *PLOS ONE*. 2019;14(3):e0213593.

- 1  
2  
3 641 41.NSW Government. Medication Handling In: NSW Health, editor. St Leonards, New South Wales:  
4 642 NSW Government; 2022.  
5 643 42.Queensland Government. Commonwealth funding of medicines Brisbane, QLD: Queensland  
6 644 Health,; 2019 [cited 2023 20 Oct]. Available from: [https://www.health.qld.gov.au/clinical-](https://www.health.qld.gov.au/clinical-practice/guidelines-procedures/medicines/commonwealth-funding)  
7 645 [practice/guidelines-procedures/medicines/commonwealth-funding](https://www.health.qld.gov.au/clinical-practice/guidelines-procedures/medicines/commonwealth-funding).  
8 646 43.Victorian Government Department of Health. Pharmaceutical Benefits Scheme in Victoria's public  
9 647 hospitals 2015 [cited 2023 20 Oct]. Available from: [https://www.health.vic.gov.au/patient-](https://www.health.vic.gov.au/patient-care/pharmaceutical-benefits-scheme-in-victorias-public-hospitals)  
10 648 [care/pharmaceutical-benefits-scheme-in-victorias-public-hospitals](https://www.health.vic.gov.au/patient-care/pharmaceutical-benefits-scheme-in-victorias-public-hospitals).  
11  
12  
13  
14  
15  
16  
17  
18  
19  
20  
21  
22  
23  
24  
25  
26  
27  
28  
29  
30  
31  
32  
33  
34  
35  
36  
37  
38  
39  
40  
41  
42  
43  
44  
45  
46  
47  
48  
49  
50  
51  
52  
53  
54  
55  
56  
57  
58  
59  
60

For peer review only

## Figure 1: Inclusion and Exclusion Criteria

| Inclusion Criteria                                                                                                                                                                   |
|--------------------------------------------------------------------------------------------------------------------------------------------------------------------------------------|
| Over 18 years of age                                                                                                                                                                 |
| Discharged from <i>John Hunter Hospital</i> into community setting                                                                                                                   |
| Pre-existing or newly diagnosed cardiovascular disease, or are considered high-risk for the development of cardiovascular disease using the <i>CVDCHECK</i> <sup>1</sup> online tool |
| Can provide written or verbal informed consent in the presence of a witness                                                                                                          |
| Can participate in a telephone interview                                                                                                                                             |
| Exclusion Criteria                                                                                                                                                                   |
| Not considered high-risk for development of CVD (as defined previously) AND are not currently diagnosed with CVD                                                                     |
| Discharged to a residential aged care facility where medications are managed according to local facility protocols                                                                   |
| Are not eligible to receive a HMR service as outlined by the <i>Pharmacy Programs Administrator Program Rules</i> <sup>2</sup>                                                       |
| Have significant cognitive impairment and cannot participate in a semi-structured interview                                                                                          |
| Receiving palliative care and participation in the interview will incur foreseeable challenges                                                                                       |

1. Australian Chronic Disease Prevention Alliance. Australian Guideline for assessing and managing cardiovascular disease risk. In: Australian Government Department of Health and Aged Care, editor. Canberra, ACT: Commonwealth of Australia; 2023.
2. Pharmacy Programs Administrator. Medication Management Programs [cited 2023 Sep 13]. Available from: <https://www.ppaonline.com.au/programs/medication-management-programs>.

| Participant Characteristics             |                         | n, (%)   |
|-----------------------------------------|-------------------------|----------|
| <b>Age</b>                              |                         |          |
|                                         | 30–39                   | 2 (12.5) |
|                                         | 40–49                   | 3 (19)   |
|                                         | 50–59                   | 5 (31)   |
|                                         | 60–69                   | 2 (12.5) |
|                                         | 70–79                   | 4 (25)   |
| <b>Gender</b>                           |                         |          |
|                                         | Male                    | 9 (56)   |
|                                         | Female                  | 7 (44)   |
| <b>Diagnosis</b>                        |                         |          |
|                                         | STEMI                   | 5 (31)   |
|                                         | NSTEMI                  | 5 (31)   |
|                                         | Ischaemic Heart Disease | 1 (6)    |
|                                         | HFrEF                   | 1 (6)    |
|                                         | HFpEF                   | 3 (19)   |
|                                         | Infective Endocarditis  | 1 (6)    |
| <b>Regular Medications at Discharge</b> |                         |          |
|                                         | 1–4                     | 2 (13)   |
|                                         | 5–9                     | 8 (50)   |
|                                         | 10–14                   | 5 (31)   |
|                                         | 15–19                   | 0 (0)    |
|                                         | 20                      | 1 (6)    |
| <b>Number of Comorbidities</b>          |                         |          |
|                                         | Zero                    | 3 (19)   |
|                                         | 1–4                     | 7 (44)   |
|                                         | 5–9                     | 5 (31)   |
|                                         | 10+                     | 1 (6)    |

**Figure 2:** Demographics of Interviewed Cardiovascular Disease Patients.

STEMI: ST-elevated myocardial infarction; NSTEMI: non-ST-elevated myocardial infarction; HFrEF: heart failure with reduced ejection fraction; HFpEF: heart failure with preserved ejection fraction.

Regular Medications at Discharge denotes medication taken daily by patient (excludes 'when required' or 'pro re nata' (PRN) medications).

Number of comorbidities according to patient's hospital discharge paperwork.



## Standards for Reporting Qualitative Research (SRQR)\*

<http://www.equator-network.org/reporting-guidelines/srqr/>

Page/line no(s).

### Title and abstract

|                                                                                                                                                                                                                                                              |                      |
|--------------------------------------------------------------------------------------------------------------------------------------------------------------------------------------------------------------------------------------------------------------|----------------------|
| <p><b>Title</b> - Concise description of the nature and topic of the study Identifying the study as qualitative or indicating the approach (e.g., ethnography, grounded theory) or data collection methods (e.g., interview, focus group) is recommended</p> | Page 1/Lines 1-2     |
| <p><b>Abstract</b> - Summary of key elements of the study using the abstract format of the intended publication; typically includes background, purpose, methods, results, and conclusions</p>                                                               | Page 2-3/Lines 28-52 |

### Introduction

|                                                                                                                                                                     |                      |
|---------------------------------------------------------------------------------------------------------------------------------------------------------------------|----------------------|
| <p><b>Problem formulation</b> - Description and significance of the problem/phenomenon studied; review of relevant theory and empirical work; problem statement</p> | Page 5/Lines 102-111 |
| <p><b>Purpose or research question</b> - Purpose of the study and specific objectives or questions</p>                                                              | Page 5/Lines 111-115 |

### Methods

|                                                                                                                                                                                                                                                                                                                                                                                                             |                      |
|-------------------------------------------------------------------------------------------------------------------------------------------------------------------------------------------------------------------------------------------------------------------------------------------------------------------------------------------------------------------------------------------------------------|----------------------|
| <p><b>Qualitative approach and research paradigm</b> - Qualitative approach (e.g., ethnography, grounded theory, case study, phenomenology, narrative research) and guiding theory if appropriate; identifying the research paradigm (e.g., postpositivist, constructivist/ interpretivist) is also recommended; rationale**</p>                                                                            | Page 6/Lines 120     |
| <p><b>Researcher characteristics and reflexivity</b> - Researchers' characteristics that may influence the research, including personal attributes, qualifications/experience, relationship with participants, assumptions, and/or presuppositions; potential or actual interaction between researchers' characteristics and the research questions, approach, methods, results, and/or transferability</p> | Page 7/Lines 144-150 |
| <p><b>Context</b> - Setting/site and salient contextual factors; rationale**</p>                                                                                                                                                                                                                                                                                                                            | Page 6/Lines 121-123 |
| <p><b>Sampling strategy</b> - How and why research participants, documents, or events were selected; criteria for deciding when no further sampling was necessary (e.g., sampling saturation); rationale**</p>                                                                                                                                                                                              | Page 6/Lines 123-127 |
| <p><b>Ethical issues pertaining to human subjects</b> - Documentation of approval by an appropriate ethics review board and participant consent, or explanation for lack thereof; other confidentiality and data security issues</p>                                                                                                                                                                        | Page 6/Lines 127-132 |
| <p><b>Data collection methods</b> - Types of data collected; details of data collection procedures including (as appropriate) start and stop dates of data collection and analysis, iterative process, triangulation of sources/methods, and modification of procedures in response to evolving study findings; rationale**</p>                                                                             | Page 6/Lines 135-137 |

|                       |                                                                                                                                                                                                                                                       |                               |
|-----------------------|-------------------------------------------------------------------------------------------------------------------------------------------------------------------------------------------------------------------------------------------------------|-------------------------------|
| 1<br>2<br>3<br>4<br>5 | <b>Data collection instruments and technologies</b> - Description of instruments (e.g., interview guides, questionnaires) and devices (e.g., audio recorders) used for data collection; if/how the instrument(s) changed over the course of the study | Page 6-7/Lines 137-142        |
| 6<br>7<br>8           | <b>Units of study</b> - Number and relevant characteristics of participants, documents, or events included in the study; level of participation (could be reported in results)                                                                        | Page 7/Lines 157-160          |
| 9<br>10<br>11<br>12   | <b>Data processing</b> - Methods for processing data prior to and during analysis, including transcription, data entry, data management and security, verification of data integrity, data coding, and anonymization/de-identification of excerpts    | Page 6/Lines 137-138          |
| 13<br>14<br>15<br>16  | <b>Data analysis</b> - Process by which inferences, themes, etc., were identified and developed, including the researchers involved in data analysis; usually references a specific paradigm or approach; rationale**                                 | Page 7/Lines 142-154          |
| 17<br>18<br>19<br>20  | <b>Techniques to enhance trustworthiness</b> - Techniques to enhance trustworthiness and credibility of data analysis (e.g., member checking, audit trail, triangulation); rationale**                                                                | Page 7/Lines 142-145, 152-154 |

## Results/findings

|                      |                                                                                                                                                                                                   |                        |
|----------------------|---------------------------------------------------------------------------------------------------------------------------------------------------------------------------------------------------|------------------------|
| 23<br>24<br>25<br>26 | <b>Synthesis and interpretation</b> - Main findings (e.g., interpretations, inferences, and themes); might include development of a theory or model, or integration with prior research or theory | Page 7-19/Line 156-417 |
| 27<br>28<br>29       | <b>Links to empirical data</b> - Evidence (e.g., quotes, field notes, text excerpts, photographs) to substantiate analytic findings                                                               | Page 7-19/Line 156-417 |

## Discussion

|                                        |                                                                                                                                                                                                                                                                                                                                                                                                             |                         |
|----------------------------------------|-------------------------------------------------------------------------------------------------------------------------------------------------------------------------------------------------------------------------------------------------------------------------------------------------------------------------------------------------------------------------------------------------------------|-------------------------|
| 32<br>33<br>34<br>35<br>36<br>37<br>38 | <b>Integration with prior work, implications, transferability, and contribution(s) to the field</b> - Short summary of main findings; explanation of how findings and conclusions connect to, support, elaborate on, or challenge conclusions of earlier scholarship; discussion of scope of application/generalizability; identification of unique contribution(s) to scholarship in a discipline or field | Page 19-22/Line 419-497 |
| 39<br>40                               | <b>Limitations</b> - Trustworthiness and limitations of findings                                                                                                                                                                                                                                                                                                                                            | Page 22/Line 490-497    |

## Other

|                |                                                                                                                                               |                      |
|----------------|-----------------------------------------------------------------------------------------------------------------------------------------------|----------------------|
| 43<br>44<br>45 | <b>Conflicts of interest</b> - Potential sources of influence or perceived influence on study conduct and conclusions; how these were managed | Page 24/Line 535-537 |
| 46<br>47<br>48 | <b>Funding</b> - Sources of funding and other support; role of funders in data collection, interpretation, and reporting                      | Page 23/Line 519-529 |

\*The authors created the SRQR by searching the literature to identify guidelines, reporting standards, and critical appraisal criteria for qualitative research; reviewing the reference lists of retrieved sources; and contacting experts to gain feedback. The SRQR aims to improve the transparency of all aspects of qualitative research by providing clear standards for reporting qualitative research.

1  
2  
3  
4  
5  
6  
7  
8  
9  
10  
11  
12  
13  
14  
15  
16  
17  
18  
19  
20  
21  
22  
23  
24  
25  
26  
27  
28  
29  
30  
31  
32  
33  
34  
35  
36  
37  
38  
39  
40  
41  
42  
43  
44  
45  
46  
47  
48  
49  
50  
51  
52  
53  
54  
55  
56  
57  
58  
59  
60

\*\*The rationale should briefly discuss the justification for choosing that theory, approach, method, or technique rather than other options available, the assumptions and limitations implicit in those choices, and how those choices influence study conclusions and transferability. As appropriate, the rationale for several items might be discussed together.

**Reference:**

O'Brien BC, Harris IB, Beckman TJ, Reed DA, Cook DA. **Standards for reporting qualitative research: a synthesis of recommendations.** *Academic Medicine*, Vol. 89, No. 9 / Sept 2014  
DOI: 10.1097/ACM.0000000000000388

For peer review only

# BMJ Open

## Pharmacist-Led Medication Management Services: A Qualitative Exploration of Transition-of-Care Cardiovascular Disease Patient Experiences

|                                 |                                                                                                                                                                                                                                                                                                                                                                                                                                                                                                                                                                                                                                                                                                                                                                                                                                                                                                                                                                                                                                                                                                                                                                                                                 |
|---------------------------------|-----------------------------------------------------------------------------------------------------------------------------------------------------------------------------------------------------------------------------------------------------------------------------------------------------------------------------------------------------------------------------------------------------------------------------------------------------------------------------------------------------------------------------------------------------------------------------------------------------------------------------------------------------------------------------------------------------------------------------------------------------------------------------------------------------------------------------------------------------------------------------------------------------------------------------------------------------------------------------------------------------------------------------------------------------------------------------------------------------------------------------------------------------------------------------------------------------------------|
| Journal:                        | <i>BMJ Open</i>                                                                                                                                                                                                                                                                                                                                                                                                                                                                                                                                                                                                                                                                                                                                                                                                                                                                                                                                                                                                                                                                                                                                                                                                 |
| Manuscript ID                   | bmjopen-2023-082228.R1                                                                                                                                                                                                                                                                                                                                                                                                                                                                                                                                                                                                                                                                                                                                                                                                                                                                                                                                                                                                                                                                                                                                                                                          |
| Article Type:                   | Original research                                                                                                                                                                                                                                                                                                                                                                                                                                                                                                                                                                                                                                                                                                                                                                                                                                                                                                                                                                                                                                                                                                                                                                                               |
| Date Submitted by the Author:   | 10-Mar-2024                                                                                                                                                                                                                                                                                                                                                                                                                                                                                                                                                                                                                                                                                                                                                                                                                                                                                                                                                                                                                                                                                                                                                                                                     |
| Complete List of Authors:       | <p>Bennetts, Joshua; The University of Newcastle, School of Biomedical Sciences and Pharmacy; Hunter Medical Research Institute</p> <p>White, Jennifer; Hunter Medical Research Institute; The University of Newcastle, School of Medicine and Public Health</p> <p>Croft, Hayley; The University of Newcastle, School of Biomedical Sciences and Pharmacy</p> <p>Cooper, Joyce; The University of Newcastle, School of Biomedical Sciences and Pharmacy; James Cook University, College of Medicine and Dentistry</p> <p>McIvor, Dawn; The University of Newcastle, College of Health, Medicine, and Wellbeing; Hunter New England Local Health District, Cardiovascular Department</p> <p>Eadie, Nicholas; Hunter New England Local Health District, Department of Pharmacy</p> <p>Appay, Marcelle; The University of Newcastle, School of Biomedical Sciences and Pharmacy; Hunter New England Local Health District, Department of Pharmacy</p> <p>L Sverdlov, Aaron; The University of Newcastle, School of Medicine and Public Health; Hunter Medical Research Institute</p> <p>Ngo, Doan; The University of Newcastle, School of Biomedical Sciences and Pharmacy; Hunter Medical Research Institute</p> |
| <b>Primary Subject Heading</b>: | Health services research                                                                                                                                                                                                                                                                                                                                                                                                                                                                                                                                                                                                                                                                                                                                                                                                                                                                                                                                                                                                                                                                                                                                                                                        |
| Secondary Subject Heading:      | Cardiovascular medicine, Medical management, Patient-centred medicine, Pharmacology and therapeutics, Qualitative research                                                                                                                                                                                                                                                                                                                                                                                                                                                                                                                                                                                                                                                                                                                                                                                                                                                                                                                                                                                                                                                                                      |
| Keywords:                       | Pharmacists, Medication Reconciliation, Cardiovascular Disease, Hospital to Home Transition, Medication Review, CARDIOLOGY                                                                                                                                                                                                                                                                                                                                                                                                                                                                                                                                                                                                                                                                                                                                                                                                                                                                                                                                                                                                                                                                                      |
|                                 |                                                                                                                                                                                                                                                                                                                                                                                                                                                                                                                                                                                                                                                                                                                                                                                                                                                                                                                                                                                                                                                                                                                                                                                                                 |

SCHOLARONE™  
Manuscripts

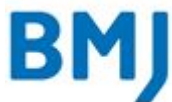

I, the Submitting Author has the right to grant and does grant on behalf of all authors of the Work (as defined in the below author licence), an exclusive licence and/or a non-exclusive licence for contributions from authors who are: i) UK Crown employees; ii) where BMJ has agreed a CC-BY licence shall apply, and/or iii) in accordance with the terms applicable for US Federal Government officers or employees acting as part of their official duties; on a worldwide, perpetual, irrevocable, royalty-free basis to BMJ Publishing Group Ltd ("BMJ") its licensees and where the relevant Journal is co-owned by BMJ to the co-owners of the Journal, to publish the Work in this journal and any other BMJ products and to exploit all rights, as set out in our [licence](#).

The Submitting Author accepts and understands that any supply made under these terms is made by BMJ to the Submitting Author unless you are acting as an employee on behalf of your employer or a postgraduate student of an affiliated institution which is paying any applicable article publishing charge ("APC") for Open Access articles. Where the Submitting Author wishes to make the Work available on an Open Access basis (and intends to pay the relevant APC), the terms of reuse of such Open Access shall be governed by a Creative Commons licence – details of these licences and which [Creative Commons](#) licence will apply to this Work are set out in our licence referred to above.

Other than as permitted in any relevant BMJ Author's Self Archiving Policies, I confirm this Work has not been accepted for publication elsewhere, is not being considered for publication elsewhere and does not duplicate material already published. I confirm all authors consent to publication of this Work and authorise the granting of this licence.

1  
2  
3  
4 1 ***Pharmacist-Led Medication Management Services: A Qualitative Exploration***  
5  
6 2 ***of Transition-of-Care Cardiovascular Disease Patient Experiences***  
7

8 3 Joshua Bennetts<sup>1,2</sup>, Jennifer White<sup>2,3</sup>, Hayley Croft<sup>1</sup>, Joyce Cooper<sup>1,4</sup>, Dawn McIvor<sup>5,6</sup>,  
9  
10 4 Nicholas Eadie<sup>7</sup>, Marcelle Appay<sup>1,7,8</sup>, Aaron Sverdlov<sup>2,3,6</sup>, Doan Ngo<sup>1,2</sup>  
11  
12 5

- 13  
14 6 1. School of Biomedical Science and Pharmacy, The University of Newcastle,  
15 7 Callaghan, NSW 2308, Australia  
16 8 2. Hunter Medical Research Institute, New Lambton Heights, NSW 2305, Australia  
17 9 3. School of Medicine and Public Health, The University of Newcastle, Callaghan, NSW  
18 10 2308, Australia  
19 11 4. College of Medicine and Dentistry, James Cook University, Townsville, QLD 4810,  
20 12 Australia  
21 13 5. College of Health, Medicine, and Wellbeing, The University of Newcastle, Callaghan,  
22 14 NSW 2308, Australia  
23 15 6. Cardiovascular Department, John Hunter Hospital, Hunter New England Local Health  
24 16 District, New Lambton Heights, NSW 2305, Australia  
25 17 7. Department of Pharmacy, John Hunter Hospital, Hunter New England Local Health  
26 18 District, New Lambton Heights, NSW 2305, Australia  
27 19 8. School of Pharmacy, Faculty of Medicine and Health, University of Sydney,  
28 20 Camperdown, NSW 2006, Australia  
29  
30  
31  
32  
33  
34  
35

36 22 **Corresponding Author:**

37  
38 23 Professor Doan Ngo (B.Pharm, PhD, FESC, FCSANZ)

39  
40 24 Co-Director, Heart and Stroke research program, HMRI

41  
42 25 School of Biomedical Science and Pharmacy

43  
44 26 T: +61 2 434 39386

45  
46 27 E: [doan.ngo@newcastle.edu.au](mailto:doan.ngo@newcastle.edu.au)

47  
48 28 The University of Newcastle (UON)

49  
50 29 University Drive, Callaghan NSW 2308 Australia

51  
52 30 Lot 1, Kookaburra Circuit, New Lambton Heights, New South Wales, 2305, Australia

53  
54 31 [doan.ngo@newcastle.edu.au](mailto:doan.ngo@newcastle.edu.au)  
55  
56  
57  
58  
59  
60

1  
2  
3 **32 Keywords**  
4  
5

6 **33 Pharmacist; Medication Reconciliation; Cardiovascular Disease; Hospital to Home**  
7  
8 **34 Transition; Medication Review**  
9  
10

11  
12 **35**  
13  
14 **36 Abstract**  
15

16 **37 Objective** Hospitalisation due to medication-related problems is a major health concern,  
17  
18 particularly for those with pre-existing, or those at high-risk of developing, cardiovascular  
19 **38 disease (CVD). Post-discharge medication reviews (PDMRs) may form a core component of**  
20  
21 **39 reducing hospital readmissions due to medication-related problems. This study aimed to**  
22  
23 **40 explore post-discharge CVD patients' perspective of, and experiences with, pharmacist-led**  
24  
25 **41 medication management services. A secondary aim explored attitudes towards availability of**  
26  
27 **42 PDMRs.**  
28  
29  
30  
31  
32

33  
34 **44 Design** An interpretative qualitative study involving 16 semi-structured interviews. Data  
35  
36 **45 were analysed using an inductive thematic approach.**  
37  
38

39  
40 **46 Setting** CVD patients discharged to a community setting from the John Hunter Hospital, an  
41  
42 **47 820-bed tertiary referral hospital based in New South Wales, Australia.**  
43  
44

45  
46 **48 Participants** Patients with pre-existing or newly diagnosed CVD who were recently  
47  
48 **49 discharged from hospital.**  
49  
50

51  
52 **50 Results** A total of 16 interviews were conducted to reach thematic saturation. Nine  
53  
54 **51 participants (56%) were male. Mean age of participants was 57.5 ( $\pm$ 13.2) years. Three**  
55  
56 **52 emergent themes were identified: (i) Poor medication understanding impacts transition from**  
57  
58  
59  
60

1  
2  
3 53 hospital to home; (ii) Factors influencing medication concordance following discharge, and  
4  
5 54 (iii) Perceived benefits of routine PDMRs.  
6  
7  
8

9 **Conclusions** There is a clear need to further improve the quality use of medicines and  
10  
11 56 health literacy of transition-of-care CVD patients. Pharmacists are suitable to provide  
12  
13 57 essential and tailored medication review services to CVD patients as part of a  
14  
15 58 multidisciplinary healthcare team. The implementation of routine, pharmacist led PDMRs  
16  
17 59 may be a feasible means of providing patients with access to health education following their  
18  
19 60 transition from hospital back to community, improving their health literacy and reducing re-  
20  
21 61 hospitalisations due to medication-related issues.  
22  
23  
24  
25  
26  
27  
28

### 29 63 **Data Availability Statement**

30  
31  
32 64 All data relevant to the study was included either in the manuscript or as supplementary  
33  
34 65 material. Selected anonymised qualitative interview data may be made available upon  
35  
36 66 request.  
37  
38  
39  
40  
41  
42

### 43 68 **Article Summary: Strengths and Limitations of This Study**

- 44  
45  
46 69 1. To our knowledge, this is the first study exploring the perspectives of transition-of-care  
47  
48 70 patients with CVD and their experiences with pharmacist-led medication management  
49  
50 71 services.  
51  
52 72 2. The strength of this study lies in the exploration of a heterogenous sample of people with  
53  
54 73 CVD across their transition of care.  
55  
56 74 3. The inductive thematic analysis approach used in this study enables the richness of the  
57  
58 75 qualitative data to be captured through a more flexible and reflective process.  
59  
60



- 1  
2  
3 76 4. Potential reporting bias: responding participants may have had different experiences to  
4  
5 77 non-responders, including access to primary care where differing models of care exist.  
6  
7  
8 78 5. Our study recruited patients who live outside major capital city area(s) of Australia and  
9  
10 79 therefore may represent unique challenges due to their geographic location, often having  
11  
12 80 poorer health outcomes than those living in major capital cities.  
13  
14

15 81  
16  
17  
18  
19  
20  
21  
22  
23  
24  
25  
26  
27  
28  
29  
30  
31  
32  
33  
34  
35  
36  
37  
38  
39  
40  
41  
42  
43  
44  
45  
46  
47  
48  
49  
50  
51  
52  
53  
54  
55  
56  
57  
58  
59  
60

For peer review only

## 82 Introduction

Word Count: 5083

83 Cardiovascular disease (CVD) is a leading cause of death and disability in Australia. In 2021  
84 alone, CVD was the underlying cause of death in 42,700 individuals, representing 25% of all  
85 deaths. During this same year, coronary heart disease was the leading single cause of death in  
86 Australia, accounting for 17,300 deaths, accounting for 10% of all deaths and 41% of CVD  
87 deaths [1]. Internationally, medication-related issues are a common contributor to  
88 hospitalisations and mortality for CVD patients who often have a high drug burden consisting  
89 of multiple medications and complex dosing regimens [2]. This is compounded in patients  
90 with poor health literacy: the inability to understand and act on medical information [3].

91  
92 Rehospitalisation due to poor medication management presents as a significant issue for  
93 cardiology patients. The likelihood of hospital readmission for CVD patients has been shown  
94 to increase by 28% in the following month because of poorly management medication  
95 regimens [4]. Poor medication concordance is closely associated with adverse outcomes in  
96 CVD patients of whom many are elderly and take 5 or more medications [5]. Poor medication  
97 concordance, use of harmful medications and withdrawal of beneficial medications have been  
98 identified as precipitating factors for 20% of heart failure (HF) hospitalisations [6]. Patients  
99 with poor medication concordance also have 36% higher mortality from ischemic heart  
100 disease, and a 2-fold increased risk of mortality from cerebral haemorrhage and cerebral  
101 infarction than those with good concordance [7].

102  
103 Internationally, the provision of pharmacist-led medication reconciliation programs during  
104 hospital transitions have been established as a means for improving post-hospital healthcare  
105 utilisation [8-11]. Growing evidence highlights that comprehensive medication reviews

1  
2  
3 106 improve health literacy and reduce the number of medication-related errors and inappropriate  
4  
5 107 use of medicines [12-17]. In Australia, medication review services were first introduced for  
6  
7 108 residents of aged care facilities in 1997, expanded to include those living in a community  
8  
9  
10 109 setting in 2001 [18, 19], and further revised in 2020, to include referrals from hospital-based  
11  
12 110 medical practitioners. The latest amendment enables the initiation of comprehensive  
13  
14 111 medication reviews through hospital networks along with the allowance for pharmacist-  
15  
16 112 initiated follow-up reviews; promoting a patient-centred cycle-of-care whereby pharmacists  
17  
18 113 are directly involved in the follow-up of medication-specific problems.  
19  
20  
21  
22  
23  
24

25 114  
26 115 To date, previous research has explored pharmacist and general practitioner (GP)  
27  
28 116 perspectives of comprehensive medication reviews, including more recently pharmacist  
29  
30 117 perspectives on the implementation of post-discharge medication reviews (PDMRs) [20-25].  
31  
32 118 There remains a lack of evidence relating to patient perspectives on PDMRs, particularly  
33  
34 119 those with existing CVD or those who are at high-risk of CVD complications. Patient  
35  
36 120 perspectives are invaluable in assessing the effectiveness of healthcare service  
37  
38 121 implementations aimed at improving health literacy and self-management. Some research  
39  
40 122 exploring pharmacist-led medication reconciliation reviews suggesting there is improved  
41  
42 123 health literacy and sustained self-management upon returning to a community setting in  
43  
44 124 CVD patients who receive pharmacist intervention [26, 27]. To our knowledge, this is the  
45  
46 125 first study exploring these perspectives of (ToC) CVD patients and their experiences with  
47  
48 126 pharmacist-led medication management services. We aimed to explore the experiences of  
49  
50 127 patients during their ToC from hospital to home probing their understanding of medication-  
51  
52 128 related changes and subsequent medicine review referral.  
53  
54  
55  
56  
57  
58  
59  
60

## 130 **Method**

### 131 *Study Design, Participant Selection and Recruitment*

132 An interpretive qualitative approach was deemed appropriate to explore our research  
133 question. Participants were recruited from the John Hunter Hospital (JHH): a major referral  
134 hospital for the Hunter New England Local Health District (HNELHD) servicing over  
135 920,000 people. To reduce the risk of recruitment bias, a clear set of inclusion criteria as  
136 shown in **Figure 1** was created to assist with identifying potential participants. Patients  
137 meeting our inclusion criteria being discharged from the JHH with either newly diagnosed or  
138 pre-existing CVD were identified by, and invited to participate, by cardiology nurses and  
139 pharmacists from the cardiology ward and cardiac rehabilitation clinic (CRC) at the JHH.  
140 Purposive sampling was used when identifying and selecting CVD patients as potential  
141 participants for the study to create a diverse and heterogeneous cohort.

142  
143 Potential participants were provided with detailed study information and had the opportunity  
144 to ask questions about the research and were aware of the voluntary nature of their  
145 participation in the study. All participants provided informed consent. Interviews were  
146 conducted between 1<sup>st</sup> September 2022 and 30<sup>th</sup> September 2023. This study employed the  
147 use of semi-structured interviews and was informed by the COnsolidated criteria for  
148 REporting Qualitative research (COREQ) checklist [28]. The interview guide was designed  
149 by a sub-group of the investigators (JB, HC, JC, and DN) following a review of existing  
150 literature. The sub-group then constructed questions based on this literature review that  
151 address the central aim of the study. However, considering the semi-structured interview  
152 design, participants had freedom to express views and experiences in their own words and  
153 diverge from the interview guide. Approval for this project was obtained from the Hunter

1  
2  
3 154 New England Health Human Research Ethics Committee (Reference Number:  
4  
5 155 2022/ETH00872).

6  
7  
8 156  
9

10  
11 157 *Patient and Public Involvement*

12  
13  
14 158 Patient and public involvement was not deemed necessary for the design and implementation  
15  
16 159 of this study.

17  
18  
19 160  
20

21  
22 161 *Data Collection and Analysis*

23  
24  
25 162 Semi-structured telephone interviews (n=16), ranging from 30-60 minutes, were conducted  
26  
27 163 by a member of the research team (JB) at a mutually convenient time between 1<sup>st</sup> September  
28  
29 164 2022 and 30<sup>th</sup> September 2023. Interviews were audio recorded with the participant's consent  
30  
31 165 and transcribed *ad verbatim* by JB with all identifying data removed. Guided by an interview  
32  
33 166 schedule, questions aimed to probe participant experiences of their recent hospitalisation  
34  
35 167 experiences and subsequent implementation and management of medications, as well as  
36  
37 168 attitudes towards pharmacist-led medication management services including availability of  
38  
39 169 PDMR services. Identified themes informed continuing data collection and sampling  
40  
41 170 continued until thematic saturation (two co-coders agreeing that no new themes were  
42  
43 171 emerging) was achieved. Coding was performed independently by two authors (JB, JW),  
44  
45 172 following an inductive thematic approach [29]. Analysis followed a three-phase approach: (i)  
46  
47 173 initial familiarisation of the data following a systematic identification of salient themes within  
48  
49 174 each interview transcript; (ii) generation of a coding scheme with distinct boundaries linked  
50  
51 175 to sections of the written transcript; (iii) collation of codes into larger themes by examining  
52  
53 176 relationships between each code. Transcripts were coded line-by-line, describing and  
54  
55 177 interpreting emerging categories, and searching for differences and similarities. The next step  
56  
57  
58  
59  
60

1  
2  
3 178 involved examining the relationship between categories in the context of the research  
4  
5 179 question to form themes. Consistency of findings was upheld through immersion within the  
6  
7  
8 180 data, and peer debriefing with data coding reflexivity and discussion with the research team  
9  
10 181 [30, 31]. Coders captured exemplar quotes supporting each theme.  
11  
12

13 182

## 16 183 **Results**

19 184 A total of 18 participants provided written informed consent to be interviewed, with 16  
20  
21 185 completing the interview process. One participant declined the interview and another  
22  
23 186 participant passed away prior to being interviewed. Demographics for the 16 participants  
24  
25  
26 187 (mean age 57.5 ( $\pm$ 13.2) years, 9 (56%) male) are shown in **Figure 2**.  
27  
28

29 188 Three emergent themes were identified:  
30  
31

- 32 189 (i) *Poor medication understanding impacts transition from hospital to home;*  
33  
34 190 (ii) *Factors influencing medication concordance following discharge, and*  
35  
36 191 (iii) *Perceived benefits of routine PDMRs*  
37  
38  
39

40 192

### 43 193 1. *Poor medication understanding impacts transition from hospital to home*

#### 45 194 *The Overwhelming Hospital Experience*

47 195 Many participants reported difficulties comprehending health-related information during  
48  
49 196 their hospital admission, including understanding the cause of their cardiovascular event, and  
50  
51  
52 197 subsequent medication and lifestyle changes recommended following their discharge.  
53  
54 198 Participants reflected on their feelings of anxiety and being overwhelmed in response to the  
55  
56 199 experience of a life-threatening cardiovascular event. Participants reportedly attributed  
57  
58  
59  
60

1  
2  
3 200 anxiety with difficulties in comprehending the initiation of, or changes to, medications  
4  
5 201 during their acute hospital admission.  
6  
7

8 202 *[It's] obviously a very stressful situation I was in, being so young and having a*  
9  
10 203 *cardiac thing go on. So, I didn't take everything in those first couple of days. (P1)*  
11  
12  
13 204 *Because when you're in hospital and they're telling you what tablets to take, you're*  
14  
15 205 *going 'okay, there's just so much going on in hospital.' Yeah, it's not until you get*  
16  
17 206 *home that you think 'okay, what was that all about?' It was just a whirlwind I went*  
18  
19 207 *through. (P4)*  
20  
21  
22

23 208  
24  
25  
26 209 Participants reported that understanding copious amounts of new medication-related  
27  
28 210 information was more difficult to comprehend whilst trying to grasp the extensiveness of  
29  
30 211 medications now required.  
31

32 212 *...so, they gave me a week's medication from the pharmacy at the hospital and this*  
33  
34 213 *big, two A4 sheets of all the tablets that you get. I go 'oh s\*\*t' because you don't*  
35  
36 214 *know this. I'm going to check-out, and they go 'oh, here are all your tablets' and I*  
37  
38 215 *go 'oh s\*\*t, look at all this!' (P5)*  
39  
40  
41

#### 42 216 43 44 217 *Challenges Associated with Education within a Hospital Environment*

45  
46  
47 218 Participants' understanding of their medication regime were experienced on a spectrum  
48  
49 219 where some readily grasped changes with new information while others struggled. Difficulty  
50  
51 220 understanding was compounded among participants who had no prior experience with taking  
52  
53 221 regular medications.  
54

55  
56  
57 222 *My big problem—like, I've never had anything before—is knowing what all these*  
58  
59 223 *tablets do...you know nothing, you're learning it all. (P5)*  
60

1  
2  
3 224  
4  
5  
6 225 Participants recounted varying experiences with education during their hospital admission.  
7  
8 226 Most participants reported they received a combination of verbal and/or written medication  
9  
10 227 instructions during their hospitalisation or at discharge. Participants valued staff who took  
11  
12 228 the time to explain their medication regime and “*were nice enough to write down*” (P4) or  
13  
14 229 provide written information. Information sources included physicians, nurses, and  
15  
16  
17 230 pharmacists; although some participants reported they were unsure as to who provided the  
18  
19 231 information.

20  
21  
22 232 *...the last doctor I'd seen there [in hospital], he explained to me all the way*  
23  
24 233 *through me tablets... and it was all written out for me. (P17)*

25  
26  
27 234 *I mean, ...there was a person, or some nurse, or doctor came around and explained*  
28  
29 235 *the situation. (P5)*

30  
31  
32 236  
33  
34  
35 237 However, other participants commented on the lack of information provision during their  
36  
37 238 admission and the limited reinforcement of what medication to take and why, especially  
38  
39 239 during medication rounds. Participants' reports suggested they were passive during  
40  
41 240 medication rounds and only a few pressed staff for information. Many participants perceived  
42  
43 241 limited education was due to staff time constraints and being unable to take time to engage  
44  
45 242 and deliver education in an impactful manner.

46  
47  
48  
49 243 *None really. It was just, I guess, the nurses coming and saying either 'this is due' or*  
50  
51 244 *'how are you feeling? Do you need pain relief?' (P9)*

52  
53  
54 245 *...you know, when you're in hospital, it's so busy, full-on. The doctors and nurses are*  
55  
56 246 *running from patient-to-patient. So, there's not a lot of time to actually sit and really*  
57  
58 247 *talk about medications and sort of similar things like that. (P6)*  
59  
60



1  
2  
3 248  
4  
5  
6 249 Participants' reports suggested the negative impact of receiving differing information from  
7  
8 250 multiple sources. Some participants reported a lack of consistency between staff members  
9  
10 251 which accentuated anxiety and confusion.

11  
12  
13 252 *So, I guess it's probably a little bit of anxiousness where you get little snippets of*  
14  
15 253 *information...you've got no idea... I think it's because the message isn't coming from*  
16  
17 254 *the one person all the time. Like it's coming from various different people. (P7)*  
18  
19

20  
21 255

### 22 23 256 *Implementing Medication Self-Management*

24  
25  
26 257 Many participants described the difficulties engaging with self-management education when  
27  
28 258 they felt unwell, distracted by an unfamiliar environment, or were focussed on "wanting to  
29  
30 259 *get home.*" (P5)

31  
32  
33  
34 260 *The thing is, you've been sick in hospital, you don't think. So, your mind's all muddled*  
35  
36 261 *up or you go 'whatever, I don't want to listen to you.'* (P17)  
37  
38

39 262

40  
41  
42 263 Being a passive recipient of medications in hospital, alongside struggling to understand a  
43  
44 264 new medication regime, reportedly impacted participants' confidence to manage their  
45  
46 265 medications on discharge. Participants reported that they were most unsure during the first  
47  
48 266 few weeks post-discharge as they attempted to establish routines with either taking  
49  
50 267 medications for the first time or implementing a new medication regimen.

51  
52  
53  
54 268 *But at the time it's a bit, like, I'm a bit confused about what is what, going through*  
55  
56 269 *boxes and reading my list. So yeah, the first few weeks was a bit confusing with what I*  
57  
58 270 *was taking. (P4)*  
59  
60

1  
2  
3 271  
4  
5

6 272 While some participants reported ongoing feelings of anxiety and being overwhelmed by  
7  
8 273 a lack of familiarity with medication terminology and understanding the purpose of their  
9  
10 274 medication, others embraced self-education. For many, this involved conducting online  
11  
12 275 research or talking to family members who were health professionals, especially in  
13  
14 276 relation to side effects.

17  
18 277 *I came home without too much insight into what they [medications] are and that sort*  
19  
20 278 *of thing. It's been kind of left up to my own accord to basically prepare myself. (P9)*

21  
22  
23 279 *I asked my sister — she's a cardiothoracic nurse. So, I asked her, you know, side*  
24  
25 280 *effects I was having that I got on the weekend. (P2)*

26  
27  
28  
29 281  
30  
31

## 32 282 2. Factors influencing medication concordance following discharge

### 33 34 283 *Discharge home*

35  
36  
37 284 For many participants, the reality of needing to take life-saving medication became apparent  
38  
39 285 on return home when they were confronted with the seriousness of the situation and the need  
40  
41 286 to develop new daily medication routines. Many were grateful they were on sick leave or  
42  
43 287 had time post-discharge to establish a routine, including being mindful of when medications  
44  
45 288 needed to be taken and if they needed to be taken with meals or not.

46  
47  
48  
49 289 *And generally, I get up at the same time each day. Having said that, I am on sick*  
50  
51 290 *leave at the moment. So that will take time and breakfast will change when I go*  
52  
53 291 *back to work. But that's down the track management. (P1)*

54  
55  
56  
57 292  
58  
59  
60

1  
2  
3 293 For participants, especially those without prior experience with taking medication,  
4  
5 294 remembering to administer doses, manage prescriptions and medication supply, and follow-  
6  
7  
8 295 up appointments with GPs whilst balancing prior commitments with family or work was an  
9  
10 296 additional burden.

11  
12  
13 297 *I'm just a really busy person. I work full-time and then I've got two kids. So, by having*  
14  
15 298 *to throw medication in on that...I guess it's like when you're a new person to start*  
16  
17 299 *taking medication...you've got to take the medication seriously. Like it's not the first*  
18  
19 300 *thing that's on my mind which is not good. I need to change that. (P7)*  
20  
21  
22

23 301

### 24 25 302 *Cardiac Rehabilitation*

26  
27  
28  
29 303 Several participants reported they continued to lack understanding of their medication  
30  
31 304 regime, which was apparent when engaging with other health professionals such as dentists  
32  
33 305 or rehabilitation therapists.

34  
35  
36 306 *I even went to the dentist, and they said: 'what are you on, we need to update your*  
37  
38 307 *records', and I didn't even know. (P9)*

39  
40  
41 308 *I was just at Cardio Rehab [CRC]...and they asked me if I was on a beta-blocker,*  
42  
43 309 *and I actually didn't know what a beta-blocker was. I was, like, not sure! (P7)*  
44  
45  
46

47 310

48  
49  
50 311 Nine participants were recruited through the CRC at the JHH and reported increased  
51  
52 312 accessibility and reinforcement of medication information through the clinic. Participation in  
53  
54 313 the CRC provided participants with an opportunity for further engagement with specialists  
55  
56 314 in cardiology and ask questions or raise concerns related to medications or management of  
57  
58 315 their CVD.  
59  
60

1  
2  
3 316 *...I was going to have a chat with one of the guys at the pharmacy, but I thought I'm at*  
4  
5 317 *rehab [CRC] today, I'll chat with them [the nurses] about the cholesterol medication*  
6  
7  
8 318 *I'm on. (P6)*  
9

10  
11 319

12  
13  
14 320 *External support*

15  
16  
17 321 Many participants relied on others to help manage their medications and adhere to them, be  
18  
19 322 that family members, carers, or community pharmacists. While this was most evident in the  
20  
21 323 weeks following discharge, others reported an ongoing reliance on family members or  
22  
23 324 carers. As such, some participants acknowledged they had less opportunity to engage with  
24  
25 325 community pharmacists for ongoing education, information, or intervention if necessary.  
26  
27

28  
29 326 *My son sort of gets them out and gives them to me, and I just take them as I'm*  
30  
31 327 *supposed to. I'm a bit foggy at the moment, but he's looking after it. I'll have to get*  
32  
33 328 *more involved very shortly. (P15)*  
34

35  
36 329 *Because, say I say to my wife: 'I'm too sick to get my tablets today, can you pick*  
37  
38 330 *them up for me?' So, if someone else goes and picks up your tablets for you, you*  
39  
40 331 *don't have any interaction with the pharmacist. (P5)*  
41  
42

43  
44 332

45  
46  
47 333 *Engagement with Pharmacist-Led Medication Management Services*

48  
49  
50 334 Many participants stated that their experience with pharmacist-led medication management  
51  
52 335 services was limited to medication supply and prescription management, predominantly  
53  
54 336 delivered in a community setting.  
55

56  
57 337 *So, you know, I guess their role is pretty broad. But personally, I use them for*  
58  
59 338 *prescriptions and information around that and that's probably about it. (P12)*  
60

1  
2  
3 339 *Sort of nothing really. Just when it comes to medication-wise. Like that's the only time I*  
4  
5 340 *sort of have anything to do with pharmacists, it's when I've gotta pick up medication.*  
6  
7 341 *(P14)*  
8  
9

10 342  
11  
12 343 Participants readily identified the importance of community pharmacies managing their  
13  
14 344 prescriptions and medications, including the use of dose administration aids (DAAs).  
15  
16

17 345 *So obviously looking at things of whether Webster-paks® or blister packs*  
18  
19 346 *[medication compliance packaging] — pre-made medications — that sort of*  
20  
21 347 *thing as well I think is really important. (P1)*  
22  
23  
24

25 348 However, some participants acknowledged that by relying on an external source there was  
26  
27 349 the potential for error or oversight if they weren't familiar with changes to their medications.  
28  
29

30 350 *I gave my prescriptions actually to the pharmacist. You don't have to think about*  
31  
32 351 *sitting at the table and dividing them all up and hoping that they're not all*  
33  
34 352 *wrong...which has happened a couple of times. I've gone a couple of weeks without*  
35  
36 353 *realising I wasn't taking one particular [medication]. (P18)*  
37  
38  
39

40 354  
41  
42 355 *Engagement with community care*  
43  
44

45 356 Participants who followed through with an appointment to see their GP on discharge  
46  
47 357 indicated the benefit in gaining further understanding of their recent hospitalisation and  
48  
49 358 medication changes, including accessing new prescriptions.  
50  
51

52  
53 359 *I was told to go to my GP a week after which I did yesterday...she reinforced what*  
54  
55 360 *[medications] they had sent me home with. (P11)*  
56  
57

58 361  
59  
60

1  
2  
3 362 Overall, participants reported a wide range of challenges adhering to a medication regime on  
4  
5 363 discharge. Many participants were not supplied with sufficient medication quantities on  
6  
7 364 discharge to seen them through to their follow-up GP appointment, who were often required  
8  
9  
10 365 to wait several weeks.

11  
12  
13 366 *...because my GP is booked out that far ahead, I'm looking at two to three weeks.*

14  
15 367 *When I rang up to say that I need an appointment to arrange some medications after I*  
16  
17 368 *had a heart attack, they had to put me on an emergency waiting list, and even then, it*  
18  
19 369 *took them seven days to get me in. (P3)*

20  
21  
22  
23 370

24  
25  
26 371 Participants were reportedly confronted with the concept of taking multiple medications,  
27  
28 372 highlighting their embarrassment and the stigma associated with medication use. Some  
29  
30 373 participants were reluctant to seek pharmacist-led medication management services, such as  
31  
32 374 DAAs, due to its perceived association with advanced age.

33  
34  
35 375 *...going into the pharmacy and just slapping them [the prescriptions] down on the*  
36  
37 376 *counter, it's just going to feel like I'm a walking medication taker! Once I get over the*  
38  
39 377 *initial embarrassment...I'm actually going to be calling them and saying, 'I need to fill*  
40  
41 378 *my medication'. (P7)*

42  
43  
44  
45 379 *And for me, personally, I still consider myself still fairly young, and I think this [DAA]*  
46  
47 380 *is an old person's thing. So, getting your head around it all, you know, it's a little new.*  
48  
49 381 *(P2)*

50  
51  
52  
53 382

54  
55  
56 383 Many participants commented on the benefit of accessing a community pharmacist for  
57  
58 384 medication-related information and health advice prior to escalating any concerns to their GP.

1  
2  
3 385 *I wouldn't go and pick up a multivitamin or something without talking to the chemist*

4  
5 386 *[pharmacist]: 'this is what I take. Could there be any interactions?'* (P12)

6  
7  
8 387 *Because sometimes it's hard to get into see your GP. And sometimes it's not necessary*

9  
10 388 *to see your GP. I feel that [the community pharmacist] is the 'first port-of-call'; unless*

11  
12 389 *you're really, really sick. (P6)*

13  
14  
15  
16 390

17  
18  
19 391 Conversations with a community pharmacist on discharge home provided many participants

20  
21 392 with the reassurance they needed to better manage their medications. However, some

22  
23 393 participants reported they were reticent to speak to their community pharmacist due to

24  
25 394 privacy concerns associated with discussing personal medical information in public or being

26  
27 395 a burden when the pharmacist was perceived to be "busy". (P11)

28  
29  
30 396 *But what I really hate when I go to the chemist [pharmacy] is...they want to talk to*

31  
32 397 *you — and there are so many people around... I actually feel uncomfortable talking*

33  
34 398 *about that in front of other people...it's probably not actually sinking in because*

35  
36 399 *I'm like 'who's standing behind me, is there someone here that I know' you know?*

37  
38 400 *And I think that's probably why I didn't know a lot about my medications. (P7)*

39  
40  
41  
42  
43 401

44  
45  
46 402 For some participants, accessing a community pharmacist and pharmacy services centred

47  
48 403 around medication cost whereby participants would seek multiple pharmacies to obtain the

49  
50 404 best price for their medications. Participants acknowledged this had potential to impact

51  
52 405 continuity of care facilitated by seeing the same pharmacist.

1  
2  
3 406 *So, we try to keep costs down where we can...at least by going to that [discount*  
4  
5 407 *pharmacy] kind of thing...but in a way of a relationship, I wouldn't know any of the*  
6  
7  
8 408 *people in there. (P9)*  
9

10  
11 409

### 12 13 410 3. *Perceived benefits of routine Post-Discharge Medication Reviews*

14  
15  
16 411 Most participants acknowledged the importance of taking responsibility for their  
17  
18 412 medications. However, all participants could foresee circumstances where the availability of  
19  
20  
21 413 PDMRs would prove beneficial.

22  
23  
24 414 *I think it [PDMRs] would be really valuable. For me who's never really taken any*  
25  
26 415 *medication, you know, it's all a bit daunting all of a sudden having to take medication.*  
27  
28  
29 416 *(P2)*

30  
31  
32 417 *As a nurse, there a lot of people out there who have no clue what their medication are*  
33  
34 418 *or how they should be working, or when they should be taking them. So, I can see the*  
35  
36 419 *benefits of it — even for myself. (P16)*  
37  
38

39 420

### 40 41 42 421 *Incorporation of Post-Discharge Medication Reviews into Standard of Care*

43  
44  
45 422 Participants reported that PDMR would provide an opportunity for a tailored provision of  
46  
47 423 information. Some participants suggested incorporating a 'triage' system to account for each  
48  
49 424 patient's individual social situation and educational needs, along with assessing those who  
50  
51 425 may be at high-risk for medication misadventure.

52  
53  
54  
55 426 *There could be benefits from them [PDMRs] that you don't see until you actually have*  
56  
57 427 *someone come to have a look. I think that you would probably ideally...make contact*  
58  
59  
60



1  
2  
3 428 *with a person in hospital, so you understand what they're circumstances are. And then*  
4  
5 429 *you could make the decision from there. It's very person orientated. (P12)*  
6  
7

8 430 *...then maybe from that phone call going 'okay you sound really stressed about your*  
9  
10 431 *medication we'll try and squeeze you in tomorrow' ...I guess maybe, like, a phone call*  
11  
12 432 *to kinda like "triage" how urgently they need it. (P1)*  
13  
14  
15

16 433

17  
18  
19 434 The option for a PDMR with a pharmacist was perceived as a means of easing the anxiety  
20  
21 435 experienced during and after discharge home. Participants reported that a PDMR would  
22  
23 436 benefit their transition back into a community setting to reinforce information and provide  
24  
25 437 ongoing monitoring, reassurance, and support. Similarly, participants perceived that  
26  
27 438 receiving a PDMR at home gave them time to process their hospitalisation and any changes  
28  
29 439 implemented, which might raise issues to be discussed.  
30  
31

32  
33 440 *And also, when you're in the hospital, you might not be thinking of these things to ask*  
34  
35 441 *either because it's all new and stuff. So, by the time you get home you can all of a*  
36  
37 442 *sudden sit down and sort of absorb the information. (P2)*  
38  
39

40  
41 443 *like you feel quite safe while in hospital. But when you come home, it's a little bit*  
42  
43 444 *daunting. (P6)*  
44  
45

46 445

47  
48  
49 446 Home visitation for a PDMR was also perceived to be more conducive for medication-  
50  
51 447 related education, away from the time pressures experienced in other settings.  
52  
53

54 448 *You're not in the pharmacy with people glaring at you thinking 'hurry, hurry up, get*  
55  
56 449 *out of the way.'* And even you're not sitting in the doctor's surgery thinking 'I'm  
57  
58 450 *getting charged for every 5 minutes I'm sitting here.'* (P9)  
59  
60

1  
2  
3 451 *And when you go to the GP, it's very transactional. Like, it's just like you're in, out.*

4  
5 452 *They're really busy to the point that you don't feel confident that they really listen.*

6  
7  
8 453 *(P7)*

9  
10  
11 454

## 12 13 14 455 **Discussion**

### 15 16 17 456 *Summary of main findings*

18  
19  
20 457 Our study explored perspectives of CVD patients on their experiences with medication  
21  
22 458 management and pharmacist-led medication review services during their ToC, including  
23  
24 459 attitudes towards having access to PDMRs. Cardiology patients' ToC following a hospital  
25  
26 460 admission is often associated with a period of vulnerability that may be ameliorated through  
27  
28 461 pharmacist medication reconciliation [32]. Our findings identified that the hospital  
29  
30 462 environment presented several challenges which impacted the effective delivery of education  
31  
32 463 for inpatients. Participants detailed difficulties understanding and retaining medication-  
33  
34 464 related information during admission for a significant health event. Feelings of anxiety and  
35  
36 465 being overwhelmed contributed to poor information retention and meant participants  
37  
38 466 returning home lacking confidence in managing their medications. Despite these feelings,  
39  
40 467 many participants received minimal support through pharmacist-led medication management  
41  
42 468 services across their ToC. Overall, while participants took time to establish a routine back  
43  
44 469 home, many gradually became confident and expressed value in a medication review to  
45  
46 470 monitor and provide support upon their return to a community setting.

47  
48  
49  
50  
51  
52  
53 471

### 54 55 56 472 *Comparison with existing literature*

57  
58  
59  
60

1  
2  
3 473 Existing literature highlights the impact of time pressures on the quality and efficacy of  
4  
5 474 hospital-delivered education for inpatients has been extensively covered in the available  
6  
7 475 evidence base [33-36]. In response patients may be less equipped to manage their  
8  
9 476 medications on discharge to a community setting, thus affecting their quality use of  
10  
11 477 medicines (QUM) — the safe, effective, and appropriate use of medicines — and increasing  
12  
13 478 the risks of future hospitalisations.  
14  
15  
16  
17  
18 479

19  
20 480 Obtaining the patient perspective is a critically important phase of implementing new health  
21  
22 481 services. Our results provide the perspectives of CVD patients, thus building on existing  
23  
24 482 literature [37]. For example, White et al (2012) [38] conducted a qualitative study that  
25  
26 483 identified four key benefits of medication reviews as perceived by patients eligible for these  
27  
28 484 reviews: (i) acquisition of personalised medication information and advice; (ii) reassurance  
29  
30 485 regarding medications and coordination of their care; (iii) feeling valued and cared for by a  
31  
32 486 health care provider; (iv) enhancing the patient-provider and pharmacist-GP relationships.  
33  
34 487 Our study mirrors these observations concerning the perceived benefits of PDMRs,  
35  
36 488 particularly the need for post-discharge follow-up and the reassurance that patients  
37  
38 489 experience when receiving pharmacist input into their care.  
39  
40  
41  
42  
43  
44  
45  
46  
47  
48  
49  
50  
51  
52  
53  
54  
55  
56  
57  
58  
59  
60

491 However, the White et al study identified patient concerns around the potential for  
492 pharmacist medication reviews to be perceived as undermining the authority of the GP, thus  
493 having a negative impact on the patient's relationship with their GP [38]. Participants in our  
494 study did not share these same perspectives, and instead felt that PDMRs would have  
495 potential to improve access to primary care post-discharge through pharmacists due to  
496 difficulties experienced with accessing their GPs. Our study demonstrated PDMRs were

1  
2  
3 497 considered an opportunity to ask questions and more actively engage in education within the  
4  
5 498 security of their own home. We posit that PDMRs have the potential to bridge education  
6  
7 499 deficits that emerge on discharge home and promote communication between hospital and  
8  
9  
10 500 community-based medical practitioners.  
11

12  
13 501

14  
15  
16 502 The timing of service provision is crucial to ensure that QUM is maintained, and the risk of  
17  
18 503 medication-related problems is minimised. Evidence detailing the incidence of medication-  
19  
20 504 related problems ranges from 18.4% two-weeks post-discharge through to 37.5% four weeks  
21  
22  
23 505 post-discharge [39]. Recently, Daliri et al demonstrated that pharmacy-led transitional care  
24  
25 506 education programs reduced the proportion of patients experiencing self-reported  
26  
27 507 medication-related problems four-weeks post discharge [40]. Participants in our study  
28  
29  
30 508 highlighted their desire for early pharmacist follow-up, within the first seven days post-  
31  
32 509 discharge being the most common request. This demonstrates the importance of early post-  
33  
34 510 discharge follow-up to promote the safe and effective use of medicines for ToC patients.  
35

36  
37 511

38  
39  
40 512 Participants in the study experienced issues engaging with primary care once discharged  
41  
42 513 from hospital, with potential role for pharmacists to bridge this gap. GP access for  
43  
44 514 prescription resupply was the most common challenge experienced by participants when  
45  
46  
47 515 returning home. The limited quantities of tablets provided to participants at the time of  
48  
49 516 discharge was sometimes insufficient to sustain them until their GP appointment. The  
50  
51  
52 517 HNELHD is part of the New South Wales (NSW) public health system which stipulates that  
53  
54 518 take home supplies of regular medications must not exceed 7 days' supply when discharged  
55  
56 519 from hospital [41]. Unfortunately, this restriction imposes significant challenges for patients  
57  
58  
59 520 discharged from NSW public hospitals. This varies considerably to other states within  
60

1  
2  
3 521 Australia — for example, both Queensland and Victorian public hospital networks allow a  
4  
5 522 one-month supply of regular medications under the Pharmaceutical Benefits Scheme [42,  
6  
7 523 43]. Given that access to a GP may be difficult on discharge due to lengthy wait times, we  
8  
9 524 advocate that pharmacists may in fact play an important role in ensuring the continuity of  
10  
11 525 care and appropriate access to medications through the incorporation of a PDMR as standard  
12  
13 526 of care for ToC patients.  
14  
15  
16  
17  
18 527  
19  
20  
21 528 *Implications on future research and practice*  
22

23  
24 529 The strength of this study lies in the exploration of a heterogenous sample of cardiology  
25  
26 530 patients. A diverse cohort of participants was purposively selected to capture the broadest  
27  
28 531 range of perspectives possible. Furthermore, the inductive thematic analysis approach used in  
29  
30 532 this study enables the richness of the qualitative data to be captured through a more flexible  
31  
32 533 and reflective process. This method aims to remove a researcher's analytic preconceptions,  
33  
34 534 ensuring thematic analysis is data-driven rather than researcher-driven. We acknowledge that  
35  
36 535 many patients were reflecting on the prospect of a PDMR across their ToC rather than having  
37  
38 536 received one. A limitation of this study includes the potential for reporting bias. It is possible  
39  
40 537 that ToC CVD patients who engaged with the study may in fact have a differing experience  
41  
42 538 with pharmacist-led medication management services compared to those who did not  
43  
44 539 participate. The relatively young mean age of participants (57.5 years of age) may also not  
45  
46 540 accurately reflect the views and experiences of 'older' adult patients (over the age of 65  
47  
48 541 years) surrounding their need for pharmacist-led medication management services. It is well-  
49  
50 542 documented that patients living outside major Australian capital cities have poorer health  
51  
52 543 outcomes [44]. Our study recruited patients who predominantly live outside major capital city  
53  
54 544 area(s) of Australia. Hence, their inclusion may therefore represent unique health outcome  
55  
56  
57  
58  
59  
60

1  
2  
3 545 challenges associated with their geographic location. Our results provide a baseline  
4  
5 546 understanding of the perspectives of ToC CVD patients in terms of the implementation of  
6  
7 547 PDMRs. Future research is needed to evaluate the clinical benefit of routine PDMRs for  
8  
9 548 CVD patients to investigate the acceptability of the service, but also its impact on key CVD  
10  
11 549 outcome markers, including 30-day hospital readmission rates and the incidence of major  
12  
13 550 adverse cardiovascular events. In addition, future research should explore the perspectives of  
14  
15 551 cultural and linguistically diverse patients and those residing in regional, rural, and remote  
16  
17 552 localities.  
18  
19  
20  
21  
22  
23  
24

553

## 554 **Conclusion**

555 Pharmacists are ideally positioned to assist CVD patients across their ToC journeys as part of  
556 a broader MDT. PDMRs are viewed by ToC CVD patients as an acceptable means of  
557 improving their health literacy and QUM when transitioning from hospital back home.  
558 Routine service implementation may address the patient's desire for post-discharge follow-up  
559 and provision for education away from the busy hospital environment. Service  
560 implementation may benefit from an initial 'triage' to individualise the delivery by assessing  
561 the patient's own needs and expectations of the service, whilst screening for those who may  
562 be at high-risk of medication misadventure.  
563

563

## 564 **Acknowledgements**

565 The authors would like to thank the participants for their time and willingness to partake in  
566 the interviews.  
567

567

## 568 **Author Contributions**

569 Study design was conducted by JB, HC, JC, JW, and DN. Recruitment was conducted by JB,  
570 DM, NE, and MA. Interviews and interview transcription was performed by JB. Data  
571 analysis was completed by JB and JW. JB drafted the manuscript for publication and DN,  
572 AS, HC, JW and JC contributed to the content and revision of the manuscript. Revisions,  
573 literature, and manuscript checking was managed by JB. All authors read and approved the  
574 final version.

575

## 576 **Funding**

577 J Bennetts is the recipient of an Australian Government Research Training Program  
578 Scholarship (University of Newcastle Vice-Chancellor's Scholarship) and would like to thank  
579 the Commonwealth of Australia for their financial contribution to this research (Award ID  
580 not assigned). AL Sverdlov is supported by Heart Foundation Australia Future Leader  
581 Fellowships (Award IDs 101918 & 106025). DTM Ngo is supported by the NSW Ministry of  
582 Health EMC Fellowship, Australia (Grant ID G1701368) and Heart Foundation Australia  
583 Future Leader Fellowship (Award ID 104814). This work is supported in part by the Piggotts  
584 Family Trust from the Hunter Medical Research Institute (DTMN, JB; Grant ID G2100856);  
585 Royal Australasian College of Physicians (RACP) Foundation Research Establishment  
586 Awards (ALS; Grant ID G1801367); NSW Ministry of Health Translational Research Grant  
587 (ALS; Grant ID G1901542) and 2022 John Hunter Hospital Charitable Trust Grant (ALS, JB;  
588 Grant ID G2200585).

589

## 590 **Ethics approval and consent to participate**

1  
2  
3 591 Ethics approval was received from Hunter New England Human Research Ethics Committee  
4  
5 592 of HNELHD (Reference – 2022/ETH00872). All participants provided written informed  
6  
7  
8 593 consent prior to conducting interviews.  
9

10 594

## 14 595 **Competing interests**

17 596 JB is a credentialed pharmacist who can provide domiciliary medication management  
18  
19 597 reviews funded by the Australian Government Department of Health and Aged Care.  
20  
21

22 598

## 24 599 **References**

- 26 600 1. Health Aio, Welfare. Heart, stroke and vascular disease: Australian facts. Canberra: AIHW; 2023.  
27 601 2. Abolbashari M, Macaulay TE, Whayne TF, Mukherjee D, Saha S. Polypharmacy in cardiovascular  
28 602 medicine: problems and promises! *Cardiovascular & Hematological Agents in Medicinal Chemistry*  
29 603 (Formerly *Current Medicinal Chemistry-Cardiovascular & Hematological Agents*). 2017;15(1):31-9.  
30 604 3. Mixon AS, Myers AP, Leak CL, Lou Jacobsen JM, Cawthon C, Goggins KM, et al. Characteristics  
31 605 associated with postdischarge medication errors. *Mayo Clin Proc*. 2014;89(8):1042-51.  
32 606 4. Organization WH. Medication without harm. World Health Organization; 2017.  
33 607 5. Mastromarino V, Casenghi M, Testa M, Gabriele E, Coluccia R, Rubattu S, et al. Polypharmacy in  
34 608 heart failure patients. *Current heart failure reports*. 2014;11(2):212-9.  
35 609 6. Formiga F, Chivite D, Manito N, Casas S, Llopis F, Pujol R. Hospitalization due to acute heart  
36 610 failure. Role of the precipitating factors. *Int J Cardiol*. 2007;120(2):237-41.  
37 611 7. Kim S, Shin DW, Yun JM, Hwang Y, Park SK, Ko YJ, et al. Medication Adherence and the Risk  
38 612 of Cardiovascular Mortality and Hospitalization Among Patients With Newly Prescribed  
39 613 Antihypertensive Medications. *Hypertension*. 2016;67(3):506-12.  
40 614 8. Mekonnen AB, McLachlan AJ, Jo-anne EB. Effectiveness of pharmacist-led medication  
41 615 reconciliation programmes on clinical outcomes at hospital transitions: a systematic review and meta-  
42 616 analysis. *BMJ open*. 2016;6(2):e010003.  
43 617 9. Ramalho de Oliveira D, Brummel AR, Miller DB. Medication therapy management: 10 years of  
44 618 experience in a large integrated health care system. *Journal of Managed Care Pharmacy*.  
45 619 2010;16(3):185-95.  
46 620 10. Lee E, Braund R, Tordoff J. Examining the first year of Medicines Use Review services provided  
47 621 by pharmacists in New Zealand: 2008. *The New Zealand Medical Journal (Online)*. 2009;122(1293).  
48 622 11. Blenkinsopp A, Bond C, Raynor DK. Medication reviews. *British journal of clinical*  
49 623 *pharmacology*. 2012;74(4):573-80.  
50 624 12. Chen TF. Pharmacist-led home medicines review and residential medication management review:  
51 625 the Australian model. *Drugs & aging*. 2016;33(3):199-204.  
52 626 13. Renaudin P, Boyer L, Esteve MA, Bertault-Peres P, Auquier P, Honore S. Do pharmacist-led  
53 627 medication reviews in hospitals help reduce hospital readmissions? A systematic review and  
54 628 meta-analysis. *British journal of clinical pharmacology*. 2016;82(6):1660-73.  
55 629 14. Burgess LH, Kramer J, Castelein C, Parra JM, Timmons V, Pickens S, et al. Pharmacy-Led  
56 630 Medication Reconciliation Program Reduces Adverse Drug Events and Improves Satisfaction in a  
57 631 Community Hospital. *HCA Healthc J Med*. 2021;2(6):411-21.  
58  
59  
60



- 1  
2  
3 632 15. Abdulghani KH, Aseeri MA, Mahmoud A, Abulezz R. The impact of pharmacist-led medication  
4 633 reconciliation during admission at tertiary care hospital. *International Journal of Clinical Pharmacy*.  
5 634 2018;40(1):196-201.
- 6 635 16. Kramer J, Hayley Burgess L, Warren C, Schlosser M, Fraker S, Hamilton M. Impact of  
7 636 pharmacist-led admission medication reconciliation on patient outcomes in a large health system.  
8 637 *Journal of Patient Safety and Risk Management*. 2023;0(0):25160435231193584.
- 9 638 17. Tan JP, Cheng KKF, Siah RCJ. A systematic review and meta-analysis on the effectiveness of  
10 639 education on medication adherence for patients with hypertension, hyperlipidaemia and diabetes.  
11 640 *Journal of advanced nursing*. 2019;75(11):2478-94.
- 12 641 18. Pharmaceutical Society of Australia. Guidelines for pharmacists providing Residential Medication  
13 642 Management Review (RMMR) and Quality Use of Medicines (QUM) services. 2011.
- 14 643 19. Australian Government. Third Community Pharmacy Agreement between The Commonwealth of  
15 644 Australia and The Pharmacy Guild of Australia. In: Department of Health and Aged Care, editor.:  
16 645 Commonwealth of Australia; 2000.
- 17 646 20. Petra C, Laetitia H, Sim TF, Parsons R, Wright B, Sunderland B. Home medicines reviews and  
18 647 residential medication management reviews in Western Australia. *International journal of clinical  
19 648 pharmacy*. 2020;42(2):567-78.
- 20 649 21. Weir KR, Naganathan V, Bonner C, McCaffery K, Rigby D, McLachlan AJ, et al. Pharmacists'  
21 650 and older adults' perspectives on the benefits and barriers of Home Medicines Reviews—a qualitative  
22 651 study. *Journal of health services research & policy*. 2020;25(2):77-85.
- 23 652 22. Weir KR, Naganathan V, Rigby D, McCaffery K, Bonner C, Trevena L, et al. Home medicines  
24 653 reviews: a qualitative study of GPs' experiences. *Australian journal of primary health*. 2020;26(1):24-  
25 654 30.
- 26 655 23. Patounas M, Lau ET, Chan V, Rigby D, Kyle GJ, Khatri J, et al. Home medicines reviews: a  
27 656 national survey of Australian accredited pharmacists' health service time investment. *Pharmacy  
28 657 practice*. 2021;19(3).
- 29 658 24. Spinks J, Birch S, Wheeler AJ, Nissen L, Freeman C, Thai T, et al. Provision of home medicines  
30 659 reviews in Australia: linking population need with service provision and available pharmacist  
31 660 workforce. *Australian Health Review*. 2020;44(6):973-82.
- 32 661 25. Angley M, Criddle D, Rigby D, Elliott RA, Phillips K, Penm J, et al. Hospital-initiated  
33 662 post-discharge medication reviews in Australia: expert opinion on the barriers and enablers to  
34 663 implementation. *Journal of Pharmacy Practice and Research*. 2022;52(6):446-53.
- 35 664 26. Cawthon C, Walia S, Osborn CY, Niesner KJ, Schnipper JL, Kripalani S. Improving Care  
36 665 Transitions: The Patient Perspective. *Journal of Health Communication*. 2012;17(sup3):312-24.
- 37 666 27. Parajuli DR, Franzon J, McKinnon RA, Shakib S, Clark RA. Role of the pharmacist for improving  
38 667 self-care and outcomes in heart failure. *Current heart failure reports*. 2017;14:78-86.
- 39 668 28. Tong A, Sainsbury P, Craig J. Consolidated criteria for reporting qualitative research (COREQ): a  
40 669 32-item checklist for interviews and focus groups. *International journal for quality in health care*.  
41 670 2007;19(6):349-57.
- 42 671 29. Braun V, Clarke V. Using thematic analysis in psychology. *Qualitative research in psychology*.  
43 672 2006;3(2):77-101.
- 44 673 30. Krefting L. Rigor in qualitative research: the assessment of trustworthiness. *Am J Occup Ther*.  
45 674 1991;45(3):214-22.
- 46 675 31. Pandit NR. The creation of theory: A recent application of the grounded theory method. *The  
47 676 qualitative report*. 1996;2(4):1-15.
- 48 677 32. Al Sattouf A, Farahat R, Khatri AA. Effectiveness of Transitional Care Interventions for Heart  
49 678 Failure Patients: A Systematic Review With Meta-Analysis. *Cureus*. 2022;14(9):e29726.
- 50 679 33. Deccache A, Aujoulat I. A European perspective: common developments, differences and  
51 680 challenges in patient education. *Patient Education and Counseling*. 2001;44(1):7-14.
- 52 681 34. Badiyepymaiejahromi Z, Isfahani S, Parandavar N, Koshkaki A. Nursing students' perspectives  
53 682 regarding challenges of patient education in clinical settings. *Bangladesh Journal of Medical Science*.  
54 683 2016;15:615-20.
- 55 684 35. Tsiga E, Panagopoulou E, Sevdalis N, Montgomery A, Benos A. The influence of time pressure on  
56 685 adherence to guidelines in primary care: an experimental study. *BMJ open*. 2013;3(4):e002700.

- 1  
2  
3 686 36.Cooper JM, Garrett T. Providing medicines information and education to hospital in-patients:  
4 687 patients' experiences and preferences. *Journal of Pharmacy Practice and Research*. 2014;44(4):213-9.  
5 688 37.Australian Commission on Safety and Quality in Health Care. Patient-centred care: Improving  
6 689 quality and safety through partnerships with patients and consumers. Sydney: Australian Commission  
7 690 on Safety and Quality in Health Care,; 2011.  
8 691 38.White L, Klinner C, Carter S. Consumer perspectives of the Australian Home Medicines Review  
9 692 Program: Benefits and barriers. *Research in Social and Administrative Pharmacy*. 2012;8(1):4-16.  
10 693 39.Garcia-Caballos M, Ramos-Diaz F, Jimenez-Moleon JJ, Bueno-Cavanillas A. Drug-related  
11 694 problems in older people after hospital discharge and interventions to reduce them. *Age and ageing*.  
12 695 2010;39(4):430-8.  
13 696 40.Daliri S, Hugtenburg JG, ter Riet G, van den Bemt BJJ, Buurman BM, Scholte op Reimer WJM,  
14 697 et al. The effect of a pharmacy-led transitional care program on medication-related problems post-  
15 698 discharge: A before—After prospective study. *PLOS ONE*. 2019;14(3):e0213593.  
16 699 41.NSW Government. Medication Handling In: NSW Health, editor. St Leonards, New South Wales:  
17 700 NSW Government; 2022.  
18 701 42.Queensland Government. Commonwealth funding of medicines Brisbane, QLD: Queensland  
19 702 Health,; 2019 [cited 2023 20 Oct]. Available from: [https://www.health.qld.gov.au/clinical-  
20 703 practice/guidelines-procedures/medicines/commonwealth-funding](https://www.health.qld.gov.au/clinical-practice/guidelines-procedures/medicines/commonwealth-funding).  
21 704 43.Victorian Government Department of Health. Pharmaceutical Benefits Scheme in Victoria's public  
22 705 hospitals 2015 [cited 2023 20 Oct]. Available from: [https://www.health.vic.gov.au/patient-  
23 706 care/pharmaceutical-benefits-scheme-in-victorias-public-hospitals](https://www.health.vic.gov.au/patient-care/pharmaceutical-benefits-scheme-in-victorias-public-hospitals).  
24 707 44.Health Aio, Welfare. Rural and remote health. Canberra: AIHW; 2023.

25 708  
26  
27  
28  
29  
30  
31  
32  
33  
34  
35  
36  
37  
38  
39  
40  
41  
42  
43  
44  
45  
46  
47  
48  
49  
50  
51  
52  
53  
54  
55  
56  
57  
58  
59  
60

## Figure 1: Inclusion and Exclusion Criteria

| Inclusion Criteria                                                                                                                                                          |
|-----------------------------------------------------------------------------------------------------------------------------------------------------------------------------|
| Over 18 years of age                                                                                                                                                        |
| Discharged from <i>John Hunter Hospital</i> into a community setting                                                                                                        |
| Pre-existing or newly diagnosed cardiovascular disease, or are considered high-risk for the development of cardiovascular disease using the <i>CVDCHECK</i> online tool [1] |
| Can provide written or verbal informed consent in the presence of a witness                                                                                                 |
| Can participate in a telephone interview                                                                                                                                    |
| Exclusion Criteria                                                                                                                                                          |
| Not considered high-risk for development of CVD (as defined previously) AND are not currently diagnosed with CVD                                                            |
| Discharged to a residential aged care facility where medications are managed according to local facility protocols                                                          |
| Are not eligible to receive an Australian comprehensive medication review service as outlined by the <i>Pharmacy Programs Administrator Program Rules</i> [2]               |
| Have significant cognitive impairment and cannot participate in a semi-structured interview                                                                                 |
| Receiving palliative care and participation in the interview will incur foreseeable challenges                                                                              |

1. Australian Chronic Disease Prevention Alliance. Australian Guideline for assessing and managing cardiovascular disease risk. In: Australian Government Department of Health and Aged Care, editor. Canberra, ACT: Commonwealth of Australia, 2023.
2. Pharmacy Programs Administrator. Medication Management Programs [cited 2023 Sep 13]. Available from: <https://www.ppaonline.com.au/programs/medication-management-programs>.

| Participant Characteristics                        |                         | <i>n</i> , (%) |
|----------------------------------------------------|-------------------------|----------------|
| <b>Age</b>                                         |                         |                |
|                                                    | 30–39                   | 2 (12.5)       |
|                                                    | 40–49                   | 3 (19)         |
|                                                    | 50–59                   | 5 (31)         |
|                                                    | 60–69                   | 2 (12.5)       |
|                                                    | 70–79                   | 4 (25)         |
| <b>Gender</b>                                      |                         |                |
|                                                    | Male                    | 9 (56)         |
|                                                    | Female                  | 7 (44)         |
| <b>Diagnosis</b>                                   |                         |                |
|                                                    | STEMI                   | 5 (31)         |
|                                                    | NSTEMI                  | 5 (31)         |
|                                                    | Ischaemic Heart Disease | 1 (6)          |
|                                                    | HFrEF                   | 1 (6)          |
|                                                    | HFpEF                   | 3 (19)         |
|                                                    | Infective Endocarditis  | 1 (6)          |
| <b>Regular Prescribed Medications at Discharge</b> |                         |                |
|                                                    | 1–4                     | 2 (13)         |
|                                                    | 5–9                     | 8 (50)         |
|                                                    | 10–14                   | 5 (31)         |
|                                                    | 15–19                   | 0 (0)          |
|                                                    | 20+                     | 1 (6)          |
| <b>Number of Comorbidities</b>                     |                         |                |
|                                                    | Zero                    | 3 (19)         |
|                                                    | 1–4                     | 7 (44)         |
|                                                    | 5–9                     | 5 (31)         |
|                                                    | 10+                     | 1 (6)          |

**Figure 2:** Demographics of Interviewed Cardiovascular Disease Patients.

STEMI: ST-elevated myocardial infarction; NSTEMI: non-ST-elevated myocardial infarction; HFrEF: heart failure with reduced ejection fraction; HFpEF: heart failure with preserved ejection fraction.

Regular Medications at Discharge denotes medications taken daily by patient (excludes 'when required' or 'pro re nata' (PRN) medications).

Number of comorbidities according to patient's hospital discharge paperwork.

1  
2  
3  
4  
5  
6  
7  
8  
9

## ***Patient Perspectives of Pharmacist-Provided Medication Reviews***

### ***Semi-Structured Interview Questions***

10  
11  
12  
**Research Question:** what are the current experiences of high-risk cardiovascular disease patients with pharmacist-led medication reviews following discharge from hospital?

13  
14  
15  
**Aim:** To investigate the current model of medication review provision for high-risk cardiovascular disease patients upon discharge from hospital.

16  
17  
18  
19  
***General Introduction to Commence Interview:***

- 20 • Interviewer introduction and salutation
- 21 • Brief explanation of the purpose of the interviews and study
- 22 • Provide overview of interview format including the freedom to refuse response
- 23 provision and requesting breaks at any stage; advise that interview will be audio-
- 24 recorded
- 25 • Request verbal consent to proceed
- 26
- 27
- 28

29  
30  
***Current Medication Management of Patient***

- 31 1. Can you describe to me how you currently manage you medicines at home?
- 32 2. How many medicines are you taking (including any complimentary and non-oral
- 33 formulations)?
- 34 3. After your recent visit to hospital, how comfortable do you feel managing your
- 35 medicines?
- 36 4. Since your visit to hospital, how has your need to visit a pharmacy or speak with a
- 37 pharmacist changed?
- 38
- 39
- 40
- 41
- 42

43  
44  
***Patient Perceptions of Pharmacist Medication Management***

- 45 5. What role do you think pharmacists have in supporting you in your day-to-day
- 46 management of your medicines?
- 47 6. What interactions do you have with your regular pharmacist/pharmacy?
- 48 7. What is your understanding of medication reviews performed by a pharmacist?
- 49
- 50
- 51
- 52

53  
54  
***Previous Experiences with Medication Reviews***

- 55 8. Have you ever sat down in a pharmacy to chat with the pharmacist about your
- 56 medicines?
- 57 9. Has a pharmacist ever come out to your home to review your medicines?
- 58 10. What medicines review services have been offered to you?
- 59
- 60

1  
2  
3  
4  
5  
6  
7  
8  
9  
10  
11  
12  
13  
14  
15  
16  
17  
18  
19  
20  
21  
22  
23  
24  
25  
26  
27  
28  
29  
30  
31  
32  
33  
34  
35  
36  
37  
38  
39  
40  
41  
42  
43  
44  
45  
46  
47  
48  
49  
50  
51  
52  
53  
54  
55  
56  
57  
58  
59  
60

***Prospective Engagement with Pharmacists for Medication Reviews***

11. What medication management help was provided to you while you were in hospital?  
Who provided you this help?
  12. What medication management help has been provided to you since leaving hospital?  
Who provided you this help?
  13. Think back now to the days and weeks since leaving hospital. During this time, when  
would be the most appropriate time for a pharmacist to help manage your  
medicines?
  14. How comfortable do you feel about a pharmacist coming to your home to review  
your medicines?
  15. Tell us how a pharmacist can help with your day-to-day medicines management?
- For peer review only

## COREQ (COnsolidated criteria for REporting Qualitative research) Checklist

A checklist of items that should be included in reports of qualitative research. You must report the page number in your manuscript where you consider each of the items listed in this checklist. If you have not included this information, either revise your manuscript accordingly before submitting or note N/A.

| Topic                                          | Item No. | Guide Questions/Description                                                                                                                              | Reported on Page No. |
|------------------------------------------------|----------|----------------------------------------------------------------------------------------------------------------------------------------------------------|----------------------|
| <b>Domain 1: Research team and reflexivity</b> |          |                                                                                                                                                          |                      |
| <i>Personal characteristics</i>                |          |                                                                                                                                                          |                      |
| Interviewer/facilitator                        | 1        | Which author/s conducted the interview or focus group?                                                                                                   |                      |
| Credentials                                    | 2        | What were the researcher's credentials? E.g. PhD, MD                                                                                                     |                      |
| Occupation                                     | 3        | What was their occupation at the time of the study?                                                                                                      |                      |
| Gender                                         | 4        | Was the researcher male or female?                                                                                                                       |                      |
| Experience and training                        | 5        | What experience or training did the researcher have?                                                                                                     |                      |
| <i>Relationship with participants</i>          |          |                                                                                                                                                          |                      |
| Relationship established                       | 6        | Was a relationship established prior to study commencement?                                                                                              |                      |
| Participant knowledge of the interviewer       | 7        | What did the participants know about the researcher? e.g. personal goals, reasons for doing the research                                                 |                      |
| Interviewer characteristics                    | 8        | What characteristics were reported about the interviewer/facilitator? e.g. Bias, assumptions, reasons and interests in the research topic                |                      |
| <b>Domain 2: Study design</b>                  |          |                                                                                                                                                          |                      |
| <i>Theoretical framework</i>                   |          |                                                                                                                                                          |                      |
| Methodological orientation and Theory          | 9        | What methodological orientation was stated to underpin the study? e.g. grounded theory, discourse analysis, ethnography, phenomenology, content analysis |                      |
| <i>Participant selection</i>                   |          |                                                                                                                                                          |                      |
| Sampling                                       | 10       | How were participants selected? e.g. purposive, convenience, consecutive, snowball                                                                       |                      |
| Method of approach                             | 11       | How were participants approached? e.g. face-to-face, telephone, mail, email                                                                              |                      |
| Sample size                                    | 12       | How many participants were in the study?                                                                                                                 |                      |
| Non-participation                              | 13       | How many people refused to participate or dropped out? Reasons?                                                                                          |                      |
| <i>Setting</i>                                 |          |                                                                                                                                                          |                      |
| Setting of data collection                     | 14       | Where was the data collected? e.g. home, clinic, workplace                                                                                               |                      |
| Presence of non-participants                   | 15       | Was anyone else present besides the participants and researchers?                                                                                        |                      |
| Description of sample                          | 16       | What are the important characteristics of the sample? e.g. demographic data, date                                                                        |                      |
| <i>Data collection</i>                         |          |                                                                                                                                                          |                      |
| Interview guide                                | 17       | Were questions, prompts, guides provided by the authors? Was it pilot tested?                                                                            |                      |
| Repeat interviews                              | 18       | Were repeat interviews carried out? If yes, how many?                                                                                                    |                      |
| Audio/visual recording                         | 19       | Did the research use audio or visual recording to collect the data?                                                                                      |                      |
| Field notes                                    | 20       | Were field notes made during and/or after the interview or focus group?                                                                                  |                      |
| Duration                                       | 21       | What was the duration of the interviews or focus group?                                                                                                  |                      |
| Data saturation                                | 22       | Was data saturation discussed?                                                                                                                           |                      |
| Transcripts returned                           | 23       | Were transcripts returned to participants for comment and/or                                                                                             |                      |

| Topic                                  | Item No. | Guide Questions/Description                                                                                                        | Reported on Page No. |
|----------------------------------------|----------|------------------------------------------------------------------------------------------------------------------------------------|----------------------|
|                                        |          | correction?                                                                                                                        |                      |
| <b>Domain 3: analysis and findings</b> |          |                                                                                                                                    |                      |
| <i>Data analysis</i>                   |          |                                                                                                                                    |                      |
| Number of data coders                  | 24       | How many data coders coded the data?                                                                                               |                      |
| Description of the coding tree         | 25       | Did authors provide a description of the coding tree?                                                                              |                      |
| Derivation of themes                   | 26       | Were themes identified in advance or derived from the data?                                                                        |                      |
| Software                               | 27       | What software, if applicable, was used to manage the data?                                                                         |                      |
| Participant checking                   | 28       | Did participants provide feedback on the findings?                                                                                 |                      |
| <i>Reporting</i>                       |          |                                                                                                                                    |                      |
| Quotations presented                   | 29       | Were participant quotations presented to illustrate the themes/findings?<br>Was each quotation identified? e.g. participant number |                      |
| Data and findings consistent           | 30       | Was there consistency between the data presented and the findings?                                                                 |                      |
| Clarity of major themes                | 31       | Were major themes clearly presented in the findings?                                                                               |                      |
| Clarity of minor themes                | 32       | Is there a description of diverse cases or discussion of minor themes?                                                             |                      |

Developed from: Tong A, Sainsbury P, Craig J. Consolidated criteria for reporting qualitative research (COREQ): a 32-item checklist for interviews and focus groups. *International Journal for Quality in Health Care*. 2007. Volume 19, Number 6: pp. 349 – 357

**Once you have completed this checklist, please save a copy and upload it as part of your submission. DO NOT include this checklist as part of the main manuscript document. It must be uploaded as a separate file.**



# BMJ Open

## Pharmacist-Led Medication Management Services: A Qualitative Exploration of Transition-of-Care Cardiovascular Disease Patient Experiences

|                                 |                                                                                                                                                                                                                                                                                                                                                                                                                                                                                                                                                                                                                                                                                                                                                                                                                                                                                                                                                                                                                                                                                                                                                                          |
|---------------------------------|--------------------------------------------------------------------------------------------------------------------------------------------------------------------------------------------------------------------------------------------------------------------------------------------------------------------------------------------------------------------------------------------------------------------------------------------------------------------------------------------------------------------------------------------------------------------------------------------------------------------------------------------------------------------------------------------------------------------------------------------------------------------------------------------------------------------------------------------------------------------------------------------------------------------------------------------------------------------------------------------------------------------------------------------------------------------------------------------------------------------------------------------------------------------------|
| Journal:                        | <i>BMJ Open</i>                                                                                                                                                                                                                                                                                                                                                                                                                                                                                                                                                                                                                                                                                                                                                                                                                                                                                                                                                                                                                                                                                                                                                          |
| Manuscript ID                   | bmjopen-2023-082228.R2                                                                                                                                                                                                                                                                                                                                                                                                                                                                                                                                                                                                                                                                                                                                                                                                                                                                                                                                                                                                                                                                                                                                                   |
| Article Type:                   | Original research                                                                                                                                                                                                                                                                                                                                                                                                                                                                                                                                                                                                                                                                                                                                                                                                                                                                                                                                                                                                                                                                                                                                                        |
| Date Submitted by the Author:   | 11-Apr-2024                                                                                                                                                                                                                                                                                                                                                                                                                                                                                                                                                                                                                                                                                                                                                                                                                                                                                                                                                                                                                                                                                                                                                              |
| Complete List of Authors:       | Bennetts, Joshua; The University of Newcastle, School of Biomedical Sciences and Pharmacy; Hunter Medical Research Institute<br>White, Jennifer; Hunter Medical Research Institute; The University of Newcastle, School of Medicine and Public Health<br>Croft, Hayley; The University of Newcastle, School of Biomedical Sciences and Pharmacy<br>Cooper, Joyce; The University of Newcastle, School of Biomedical Sciences and Pharmacy; James Cook University, College of Medicine and Dentistry<br>McIvor, Dawn; The University of Newcastle, College of Health, Medicine, and Wellbeing; Hunter New England Local Health District, Cardiovascular Department<br>Eadie, Nicholas; Hunter New England Local Health District, Department of Pharmacy<br>Appay, Marcelle; The University of Newcastle, School of Biomedical Sciences and Pharmacy; Hunter New England Local Health District, Department of Pharmacy<br>L Sverdlov, Aaron; The University of Newcastle, School of Medicine and Public Health; Hunter Medical Research Institute<br>Ngo, Doan; The University of Newcastle, School of Biomedical Sciences and Pharmacy; Hunter Medical Research Institute |
| <b>Primary Subject Heading</b>: | Health services research                                                                                                                                                                                                                                                                                                                                                                                                                                                                                                                                                                                                                                                                                                                                                                                                                                                                                                                                                                                                                                                                                                                                                 |
| Secondary Subject Heading:      | Cardiovascular medicine, Medical management, Patient-centred medicine, Pharmacology and therapeutics, Qualitative research                                                                                                                                                                                                                                                                                                                                                                                                                                                                                                                                                                                                                                                                                                                                                                                                                                                                                                                                                                                                                                               |
| Keywords:                       | Pharmacists, Medication Reconciliation, Cardiovascular Disease, Hospital to Home Transition, Medication Review, CARDIOLOGY                                                                                                                                                                                                                                                                                                                                                                                                                                                                                                                                                                                                                                                                                                                                                                                                                                                                                                                                                                                                                                               |
|                                 |                                                                                                                                                                                                                                                                                                                                                                                                                                                                                                                                                                                                                                                                                                                                                                                                                                                                                                                                                                                                                                                                                                                                                                          |

SCHOLARONE™  
Manuscripts



I, the Submitting Author has the right to grant and does grant on behalf of all authors of the Work (as defined in the below author licence), an exclusive licence and/or a non-exclusive licence for contributions from authors who are: i) UK Crown employees; ii) where BMJ has agreed a CC-BY licence shall apply, and/or iii) in accordance with the terms applicable for US Federal Government officers or employees acting as part of their official duties; on a worldwide, perpetual, irrevocable, royalty-free basis to BMJ Publishing Group Ltd ("BMJ") its licensees and where the relevant Journal is co-owned by BMJ to the co-owners of the Journal, to publish the Work in this journal and any other BMJ products and to exploit all rights, as set out in our [licence](#).

The Submitting Author accepts and understands that any supply made under these terms is made by BMJ to the Submitting Author unless you are acting as an employee on behalf of your employer or a postgraduate student of an affiliated institution which is paying any applicable article publishing charge ("APC") for Open Access articles. Where the Submitting Author wishes to make the Work available on an Open Access basis (and intends to pay the relevant APC), the terms of reuse of such Open Access shall be governed by a Creative Commons licence – details of these licences and which [Creative Commons](#) licence will apply to this Work are set out in our licence referred to above.

Other than as permitted in any relevant BMJ Author's Self Archiving Policies, I confirm this Work has not been accepted for publication elsewhere, is not being considered for publication elsewhere and does not duplicate material already published. I confirm all authors consent to publication of this Work and authorise the granting of this licence.

1  
2  
3  
4 1 ***Pharmacist-Led Medication Management Services: A Qualitative Exploration***  
5  
6 2 ***of Transition-of-Care Cardiovascular Disease Patient Experiences***  
7

8 3 Joshua Bennetts<sup>1,2</sup>, Jennifer White<sup>2,3</sup>, Hayley Croft<sup>1</sup>, Joyce Cooper<sup>1,4</sup>, Dawn McIvor<sup>5,6</sup>,  
9  
10 4 Nicholas Eadie<sup>7</sup>, Marcelle Appay<sup>1,7,8</sup>, Aaron Sverdlov<sup>2,3,6</sup>, Doan Ngo<sup>1,2</sup>  
11  
12 5

- 13  
14 6 1. School of Biomedical Science and Pharmacy, The University of Newcastle,  
15 7 Callaghan, NSW 2308, Australia  
16 8 2. Hunter Medical Research Institute, New Lambton Heights, NSW 2305, Australia  
17 9 3. School of Medicine and Public Health, The University of Newcastle, Callaghan, NSW  
18 10 2308, Australia  
19 11 4. College of Medicine and Dentistry, James Cook University, Townsville, QLD 4810,  
20 12 Australia  
21 13 5. College of Health, Medicine, and Wellbeing, The University of Newcastle, Callaghan,  
22 14 NSW 2308, Australia  
23 15 6. Cardiovascular Department, John Hunter Hospital, Hunter New England Local Health  
24 16 District, New Lambton Heights, NSW 2305, Australia  
25 17 7. Department of Pharmacy, John Hunter Hospital, Hunter New England Local Health  
26 18 District, New Lambton Heights, NSW 2305, Australia  
27 19 8. School of Pharmacy, Faculty of Medicine and Health, University of Sydney,  
28 20 Camperdown, NSW 2006, Australia  
29  
30  
31  
32  
33  
34  
35

36 22 **Corresponding Author:**

37  
38 23 Professor Doan Ngo (B.Pharm, PhD, FESC, FCSANZ)

39  
40 24 Co-Director, Heart and Stroke research program, HMRI

41  
42 25 School of Biomedical Science and Pharmacy

43  
44 26 T: +61 2 434 39386

45  
46 27 E: [doan.ngo@newcastle.edu.au](mailto:doan.ngo@newcastle.edu.au)

47  
48 28 The University of Newcastle (UON)

49  
50 29 University Drive, Callaghan NSW 2308 Australia

51  
52 30 Lot 1, Kookaburra Circuit, New Lambton Heights, New South Wales, 2305, Australia

53  
54 31 [doan.ngo@newcastle.edu.au](mailto:doan.ngo@newcastle.edu.au)  
55  
56  
57  
58  
59  
60

1  
2  
3 **32 Keywords**  
4  
5

6 **33 Pharmacist; Medication Reconciliation; Cardiovascular Disease; Hospital to Home**  
7  
8 **34 Transition; Medication Review**  
9  
10

11  
12 **35**  
13  
14 **36 Abstract**  
15

16 **37 Objective** Hospitalisation due to medication-related problems is a major health concern,  
17  
18 particularly for those with pre-existing, or those at high-risk of developing, cardiovascular  
19 **38 disease (CVD). Post-discharge medication reviews (PDMRs) may form a core component of**  
20  
21 **39 reducing hospital readmissions due to medication-related problems. This study aimed to**  
22  
23 **40 explore post-discharge CVD patients' perspective of, and experiences with, pharmacist-led**  
24  
25 **41 medication management services. A secondary aim explored attitudes towards availability of**  
26  
27 **42 PDMRs.**  
28  
29  
30  
31  
32

33  
34 **44 Design** An interpretative qualitative study involving 16 semi-structured interviews. Data  
35  
36 **45 were analysed using an inductive thematic approach.**  
37  
38

39  
40 **46 Setting** CVD patients discharged to a community setting from the John Hunter Hospital, an  
41  
42 **47 820-bed tertiary referral hospital based in New South Wales, Australia.**  
43  
44

45  
46 **48 Participants** Patients with pre-existing or newly diagnosed CVD who were recently  
47  
48 **49 discharged from hospital.**  
49  
50

51  
52 **50 Results** A total of 16 interviews were conducted to reach thematic saturation. Nine  
53  
54 **51 participants (56%) were male. Mean age of participants was 57.5 ( $\pm$ 13.2) years. Three**  
55  
56 **52 emergent themes were identified: (i) Poor medication understanding impacts transition from**  
57  
58  
59  
60

1  
2  
3 53 hospital to home; (ii) Factors influencing medication concordance following discharge, and  
4  
5 54 (iii) Perceived benefits of routine PDMRs.  
6  
7  
8

9 55 **Conclusions** There is a clear need to further improve the quality use of medicines and  
10  
11 56 health literacy of transition-of-care CVD patients. Our findings indicate that the engagement  
12  
13 57 of transition-of-care CVD patients with pharmacist-led medication management services is  
14  
15 58 minimal. Pharmacists are suitable to provide essential and tailored medication review  
16  
17 59 services to CVD patients as part of a multidisciplinary healthcare team. The implementation  
18  
19 60 of routine, pharmacist led PDMRs may be a feasible means of providing patients with access  
20  
21 61 to health education following their transition from hospital back to community, improving  
22  
23 62 their health literacy and reducing re-hospitalisations due to medication-related issues.  
24  
25  
26  
27  
28  
29  
30

### 31 64 **Article Summary: Strengths and Limitations of This Study**

- 32  
33  
34 65 1. The strength of this study lies in the exploration of a heterogenous sample of people with  
35  
36 66 CVD across their transition of care.  
37  
38  
39 67 2. The inductive thematic analysis approach used in this study enables the richness of the  
40  
41 68 qualitative data to be captured through a more flexible and reflective process.  
42  
43  
44 69 3. Potential reporting bias: responding participants may have had different experiences to  
45  
46 70 non-responders, including access to primary care where differing models of care exist.  
47  
48  
49 71 4. Our study recruited patients who live outside major capital city area(s) of Australia and  
50  
51 72 therefore may represent unique challenges due to their geographic location, often having  
52  
53 73 poorer health outcomes than those living in major capital cities.  
54  
55  
56  
57  
58  
59  
60

## 75 **Introduction**

**Word Count: 5083**

76 Cardiovascular disease (CVD) is a leading cause of death and disability in Australia. In 2021  
77 alone, CVD was the underlying cause of death in 42,700 individuals, representing 25% of all  
78 deaths. During this same year, coronary heart disease was the leading single cause of death in  
79 Australia, accounting for 17,300 deaths, accounting for 10% of all deaths and 41% of CVD  
80 deaths [1]. Internationally, medication-related issues are a common contributor to  
81 hospitalisations and mortality for CVD patients who often have a high drug burden consisting  
82 of multiple medications and complex dosing regimens [2]. This is compounded in patients  
83 with poor health literacy: the inability to understand and act on medical information [3].

84  
85 Rehospitalisation due to poor medication management presents as a significant issue for  
86 cardiology patients. The likelihood of hospital readmission for CVD patients has been shown  
87 to increase by 28% in the following month because of poorly management medication  
88 regimens [4]. Poor medication concordance is closely associated with adverse outcomes in  
89 CVD patients of whom many are elderly and take 5 or more medications [5]. Poor medication  
90 concordance, use of harmful medications and withdrawal of beneficial medications have been  
91 identified as precipitating factors for 20% of heart failure (HF) hospitalisations [6]. Patients  
92 with poor medication concordance also have 36% higher mortality from ischemic heart  
93 disease, and a 2-fold increased risk of mortality from cerebral haemorrhage and cerebral  
94 infarction than those with good concordance [7].

95  
96 Internationally, the provision of pharmacist-led medication reconciliation programs during  
97 hospital transitions have been established as a means for improving post-hospital healthcare  
98 utilisation [8-11]. Growing evidence highlights that comprehensive medication reviews

1  
2  
3 99 improve health literacy and reduce the number of medication-related errors and inappropriate  
4  
5 100 use of medicines [12-17]. In Australia, medication review services were first introduced for  
6  
7 101 residents of aged care facilities in 1997, expanded to include those living in a community  
8  
9  
10 102 setting in 2001 [18, 19], and further revised in 2020, to include referrals from hospital-based  
11  
12 103 medical practitioners. The latest amendment enables the initiation of comprehensive  
13  
14 104 medication reviews through hospital networks along with the allowance for pharmacist-  
15  
16 105 initiated follow-up reviews; promoting a patient-centred cycle-of-care whereby pharmacists  
17  
18 106 are directly involved in the follow-up of medication-specific problems.  
19  
20  
21  
22 107

23  
24  
25 108 To date, previous research has explored pharmacist and general practitioner (GP)  
26  
27 109 perspectives of comprehensive medication reviews, including more recently pharmacist  
28  
29 110 perspectives on the implementation of post-discharge medication reviews (PDMRs) [20-25].  
30  
31 111 There remains a lack of evidence relating to patient perspectives on PDMRs, particularly  
32  
33 112 those with existing CVD or those who are at high-risk of CVD complications. Patient  
34  
35 113 perspectives are invaluable in assessing the effectiveness of healthcare service  
36  
37 114 implementations aimed at improving health literacy and self-management. Some research  
38  
39 115 exploring pharmacist-led medication reconciliation reviews suggesting there is improved  
40  
41 116 health literacy and sustained self-management upon returning to a community setting in  
42  
43 117 CVD patients who receive pharmacist intervention [26, 27]. To our knowledge, this is the  
44  
45 118 first study exploring these perspectives of (ToC) CVD patients and their experiences with  
46  
47 119 pharmacist-led medication management services. We aimed to explore the experiences of  
48  
49 120 patients during their ToC from hospital to home probing their understanding of medication-  
50  
51 121 related changes and subsequent medicine review referral.  
52  
53  
54  
55  
56  
57  
58 122  
59  
60

## 123 **Method**

### 124 *Study Design, Participant Selection and Recruitment*

125 An interpretive qualitative approach was deemed appropriate to explore our research  
126 question. Participants were recruited from the John Hunter Hospital (JHH): a major referral  
127 hospital for the Hunter New England Local Health District (HNELHD) servicing over  
128 920,000 people. To reduce the risk of recruitment bias, a clear set of inclusion criteria —  
129 partly informed by the *Australian Chronic Disease Prevention Alliance* [28] and the  
130 *Pharmacy Programs Administrator Program Rules* [29] — as shown in **Figure 1** was created  
131 to assist with identifying potential participants. Patients meeting our inclusion criteria being  
132 discharged from the JHH with either newly diagnosed or pre-existing CVD were identified  
133 by, and invited to participate, by cardiology nurses and pharmacists from the cardiology ward  
134 and cardiac rehabilitation clinic (CRC) at the JHH. Purposive sampling was used when  
135 identifying and selecting CVD patients as potential participants for the study to create a  
136 diverse and heterogeneous cohort.

137  
138 Potential participants were provided with detailed study information and had the opportunity  
139 to ask questions about the research and were aware of the voluntary nature of their  
140 participation in the study and were not reimbursed for their participation. All participants  
141 provided informed consent. Interviews were conducted between 1<sup>st</sup> September 2022 and 30<sup>th</sup>  
142 September 2023. This study employed the use of semi-structured interviews and was  
143 informed by the COnsolidated criteria for REporting Qualitative research (COREQ) checklist  
144 [30]. The interview guide was designed by a sub-group of the investigators (JB, HC, JC, and  
145 DN) following a review of existing literature. The sub-group then constructed questions  
146 based on this literature review that address the central aim of the study as shown in



1  
2  
3 147 Supplementary File 1. However, considering the semi-structured interview design,  
4  
5 148 participants had freedom to express views and experiences in their own words and diverge  
6  
7 149 from the interview guide. Approval for this project was obtained from the Hunter New  
8  
9 150 England Health Human Research Ethics Committee (Reference Number: 2022/ETH00872).  
11  
12

13 151

### 16 152 *Patient and Public Involvement*

17  
18  
19 153 Patient and public involvement was not deemed necessary for the design and implementation  
20  
21 154 of this study.  
22  
23

24 155

### 27 156 *Data Collection and Analysis*

28  
29  
30 157 Semi-structured telephone interviews (n=16), ranging from 30-60 minutes, were conducted  
31  
32 158 by a member of the research team (JB) at a mutually convenient time between 1<sup>st</sup> September  
33  
34 159 2022 and 30<sup>th</sup> September 2023. Interviews were audio recorded with the participant's consent  
35  
36 160 and transcribed *ad verbatim* by JB with all identifying data removed. Guided by an interview  
37  
38 161 schedule, questions aimed to probe participant experiences of their recent hospitalisation  
39  
40 162 experiences and subsequent implementation and management of medications, as well as  
41  
42 163 attitudes towards pharmacist-led medication management services including availability of  
43  
44 164 PDMR services. Identified themes informed continuing data collection and sampling  
45  
46 165 continued until thematic saturation (two co-coders agreeing that no new themes were  
47  
48 166 emerging) was achieved. Coding was performed independently by two authors (JB, JW),  
49  
50 167 following an inductive thematic approach [31]. Analysis followed a three-phase approach: (i)  
51  
52 168 initial familiarisation of the data following a systematic identification of salient themes within  
53  
54 169 each interview transcript; (ii) generation of a coding scheme with distinct boundaries linked  
55  
56 170 to sections of the written transcript; (iii) collation of codes into larger themes by examining  
57  
58  
59  
60

171 relationships between each code. Transcripts were coded line-by-line, describing and  
172 interpreting emerging categories, and searching for differences and similarities. The next step  
173 involved examining the relationship between categories in the context of the research  
174 question to form themes. Consistency of findings was upheld through immersion within the  
175 data, and peer debriefing with data coding reflexivity and discussion with the research team  
176 [32, 33]. Coders captured exemplar quotes supporting each theme.

177

## 178 **Results**

179 A total of 18 participants provided written informed consent to be interviewed, with 16  
180 completing the interview process. One participant declined the interview and another  
181 participant passed away prior to being interviewed. Demographics for the 16 participants  
182 (mean age 57.5 ( $\pm$ 13.2) years, 9 (56%) male) are shown in **Figure 2**.

183 Three emergent themes were identified:

- 184 (i) *Poor medication understanding impacts transition from hospital to home;*
- 185 (ii) *Factors influencing medication concordance following discharge, and*
- 186 (iii) *Perceived benefits of routine PDMRs*

187

### 188 1. *Poor medication understanding impacts transition from hospital to home*

#### 189 *The Overwhelming Hospital Experience*

190 Many participants reported difficulties comprehending health-related information during  
191 their hospital admission, including understanding the cause of their cardiovascular event, and  
192 subsequent medication and lifestyle changes recommended following their discharge.

193 Participants reflected on their feelings of anxiety and being overwhelmed in response to the

1  
2  
3 194 experience of a life-threatening cardiovascular event. Participants reportedly attributed  
4  
5 195 anxiety with difficulties in comprehending the initiation of, or changes to, medications  
6  
7  
8 196 during their acute hospital admission.  
9

10  
11 197 *[It's] obviously a very stressful situation I was in, being so young and having a*  
12  
13 198 *cardiac thing go on. So, I didn't take everything in those first couple of days. (P1)*

14  
15  
16 199 *Because when you're in hospital and they're telling you what tablets to take, you're*  
17  
18 200 *going 'okay, there's just so much going on in hospital.' Yeah, it's not until you get*  
19  
20 201 *home that you think 'okay, what was that all about?' It was just a whirlwind I went*  
21  
22 202 *through. (P4)*  
23  
24  
25

26 203

27  
28 204 Participants reported that understanding copious amounts of new medication-related  
29  
30 205 information was more difficult to comprehend whilst trying to grasp the extensiveness of  
31  
32 206 medications now required.  
33

34  
35 207 *...so, they gave me a week's medication from the pharmacy at the hospital and this*  
36  
37 208 *big, two A4 sheets of all the tablets that you get. I go 'oh s\*\*t' because you don't*  
38  
39 209 *know this. I'm going to check-out, and they go 'oh, here are all your tablets' and I*  
40  
41 210 *go 'oh s\*\*t, look at all this!' (P5)*  
42  
43

44 211

#### 45 46 212 *Challenges Associated with Education within a Hospital Environment*

47  
48  
49 213 Participants' understanding of their medication regime were experienced on a spectrum  
50  
51 214 where some readily grasped changes with new information while others struggled. Difficulty  
52  
53 215 understanding was compounded among participants who had no prior experience with taking  
54  
55 216 regular medications.  
56  
57  
58  
59  
60

1  
2  
3 217 *My big problem—like, I’ve never had anything before—is knowing what all these*  
4  
5 218 *tablets do...you know nothing, you’re learning it all. (P5)*  
6  
7  
8  
9 219

10 220 Participants recounted varying experiences with education during their hospital admission.  
11  
12 221 Most participants reported they received a combination of verbal and/or written medication  
13  
14 222 instructions during their hospitalisation or at discharge. Participants valued staff who took  
15  
16 223 the time to explain their medication regime and “were nice enough to write down” (P4) or  
17  
18 224 provide written information. Information sources included physicians, nurses, and  
19  
20 225 pharmacists; although some participants reported they were unsure as to who provided the  
21  
22 226 information.  
23  
24  
25  
26

27 227 *...the last doctor I’d seen there [in hospital], he explained to me all the way*  
28  
29 228 *through me tablets... and it was all written out for me. (P17)*  
30  
31

32 229 *I mean, ...there was a person, or some nurse, or doctor came around and explained*  
33  
34 230 *the situation. (P5)*  
35  
36  
37

38 231

39  
40 232 However, other participants commented on the lack of information provision during their  
41  
42 233 admission and the limited reinforcement of what medication to take and why, especially  
43  
44 234 during medication rounds. Participants’ reports suggested they were passive during  
45  
46 235 medication rounds and only a few pressed staff for information. Many participants perceived  
47  
48 236 limited education was due to staff time constraints and being unable to take time to engage  
49  
50 237 and deliver education in an impactful manner.  
51  
52

53  
54 238 *None really. It was just, I guess, the nurses coming and saying either ‘this is due’ or*  
55  
56 239 *‘how are you feeling? Do you need pain relief?’ (P9)*  
57  
58  
59  
60

1  
2  
3 240 *...you know, when you're in hospital, it's so busy, full-on. The doctors and nurses are*  
4  
5 241 *running from patient-to-patient. So, there's not a lot of time to actually sit and really*  
6  
7 242 *talk about medications and sort of similar things like that. (P6)*  
8  
9

10 243

11  
12  
13 244 Participants' reports suggested the negative impact of receiving differing information from  
14  
15 245 multiple sources. Some participants reported a lack of consistency between staff members  
16  
17 246 which accentuated anxiety and confusion.

18  
19  
20 247 *So, I guess it's probably a little bit of anxiousness where you get little snippets of*  
21  
22 248 *information...you've got no idea... I think it's because the message isn't coming from*  
23  
24 249 *the one person all the time. Like it's coming from various different people. (P7)*  
25  
26

27 250

### 28 251 *Implementing Medication Self-Management*

29  
30  
31 252 Many participants described the difficulties engaging with self-management education when  
32  
33 253 they felt unwell, distracted by an unfamiliar environment, or were focussed on "wanting to  
34  
35 254 *get home.*" (P5)

36  
37 255 *The thing is, you've been sick in hospital, you don't think. So, your mind's all muddled*  
38  
39 256 *up or you go 'whatever, I don't want to listen to you.'* (P17)  
40  
41

42 257

43  
44  
45 258 Being a passive recipient of medications in hospital, alongside struggling to understand a  
46  
47 259 new medication regime, reportedly impacted participants' confidence to manage their  
48  
49 260 medications on discharge. Participants reported that they were most unsure during the first  
50  
51 261 few weeks post-discharge as they attempted to establish routines with either taking  
52  
53 262 medications for the first time or implementing a new medication regimen.  
54  
55  
56  
57  
58  
59  
60

1  
2  
3 263 *But at the time it's a bit, like, I'm a bit confused about what is what, going through*  
4  
5 264 *boxes and reading my list. So yeah, the first few weeks was a bit confusing with what I*  
6  
7  
8 265 *was taking. (P4)*  
9

10  
11 266

12  
13  
14 267 While some participants reported ongoing feelings of anxiety and being overwhelmed by  
15  
16 268 a lack of familiarity with medication terminology and understanding the purpose of their  
17  
18 269 medication, others embraced self-education. For many, this involved conducting online  
19  
20 270 research or talking to family members who were health professionals, especially in  
21  
22  
23 271 relation to side effects.

24  
25  
26 272 *I came home without too much insight into what they [medications] are and that sort*  
27  
28 273 *of thing. It's been kind of left up to my own accord to basically prepare myself. (P9)*

29  
30  
31 274 *I asked my sister — she's a cardiothoracic nurse. So, I asked her, you know, side*  
32  
33 275 *effects I was having that I got on the weekend. (P2)*

34  
35  
36 276

37  
38  
39 277 *2. Factors influencing medication concordance following discharge*

40  
41  
42 278 *Discharge home*

43  
44  
45 279 For many participants, the reality of needing to take life-saving medication became apparent  
46  
47 280 on return home when they were confronted with the seriousness of the situation and the need  
48  
49 281 to develop new daily medication routines. Many were grateful they were on sick leave or  
50  
51 282 had time post-discharge to establish a routine, including being mindful of when medications  
52  
53 283 needed to be taken and if they needed to be taken with meals or not.  
54  
55  
56  
57  
58  
59  
60

1  
2  
3 284 *And generally, I get up at the same time each day. Having said that, I am on sick*  
4  
5 285 *leave at the moment. So that will take time and breakfast will change when I go*  
6  
7 286 *back to work. But that's down the track management. (P1)*  
8  
9

10  
11 287

12  
13  
14 288 For participants, especially those without prior experience with taking medication,  
15  
16 289 remembering to administer doses, manage prescriptions and medication supply, and follow-  
17  
18 290 up appointments with GPs whilst balancing prior commitments with family or work was an  
19  
20 291 additional burden.

21  
22  
23 292 *I'm just a really busy person. I work full-time and then I've got two kids. So, by having*  
24  
25 293 *to throw medication in on that...I guess it's like when you're a new person to start*  
26  
27 294 *taking medication...you've got to take the medication seriously. Like it's not the first*  
28  
29 295 *thing that's on my mind which is not good. I need to change that. (P7)*  
30  
31

32  
33 296

### 34 35 36 297 *Cardiac Rehabilitation*

37  
38  
39 298 Several participants reported they continued to lack understanding of their medication  
40  
41 299 regime, which was apparent when engaging with other health professionals such as dentists  
42  
43 300 or rehabilitation therapists.

44  
45  
46  
47 301 *I even went to the dentist, and they said: 'what are you on, we need to update your*  
48  
49 302 *records', and I didn't even know. (P9)*

50  
51  
52 303 *I was just at Cardio Rehab [CRC]...and they asked me if I was on a beta-blocker,*  
53  
54 304 *and I actually didn't know what a beta-blocker was. I was, like, not sure! (P7)*

55  
56  
57 305  
58  
59  
60

1  
2  
3 306 Nine participants were recruited through the CRC at the JHH and reported increased  
4  
5 307 accessibility and reinforcement of medication information through the clinic. Participation in  
6  
7 308 the CRC provided participants with an opportunity for further engagement with specialists  
8  
9  
10 309 in cardiology and ask questions or raise concerns related to medications or management of  
11  
12 310 their CVD.

13  
14  
15 311 *...I was going to have a chat with one of the guys at the pharmacy, but I thought I'm at*  
16  
17 312 *rehab [CRC] today, I'll chat with them [the nurses] about the cholesterol medication*  
18  
19  
20 313 *I'm on. (P6)*  
21  
22

23 314

#### 24 25 26 315 *External support*

27  
28  
29 316 Many participants relied on others to help manage their medications and adhere to them, be  
30  
31 317 that family members, carers, or community pharmacists. While this was most evident in the  
32  
33 318 weeks following discharge, others reported an ongoing reliance on family members or  
34  
35 319 carers. As such, some participants acknowledged they had less opportunity to engage with  
36  
37 320 community pharmacists for ongoing education, information, or intervention if necessary.

38  
39  
40  
41 321 *My son sort of gets them out and gives them to me, and I just take them as I'm*  
42  
43 322 *supposed to. I'm a bit foggy at the moment, but he's looking after it. I'll have to get*  
44  
45 323 *more involved very shortly. (P15)*  
46  
47

48  
49 324 *Because, say I say to my wife: 'I'm too sick to get my tablets today, can you pick*  
50  
51 325 *them up for me?' So, if someone else goes and picks up your tablets for you, you*  
52  
53 326 *don't have any interaction with the pharmacist. (P5)*  
54  
55

56 327

57  
58  
59 328 *Engagement with Pharmacist-Led Medication Management Services*  
60



1  
2  
3 329 Many participants stated that their experience with pharmacist-led medication management  
4  
5 330 services was limited to medication supply and prescription management, predominantly  
6  
7  
8 331 delivered in a community setting.

9  
10 332 *So, you know, I guess their role is pretty broad. But personally, I use them for*  
11  
12 333 *prescriptions and information around that and that's probably about it. (P12)*  
13  
14  
15  
16 334 *Sort of nothing really. Just when it comes to medication-wise. Like that's the only time I*  
17  
18 335 *sort of have anything to do with pharmacists, it's when I've gotta pick up medication.*  
19  
20 336 *(P14)*  
21  
22

23 337  
24  
25 338 Participants readily identified the importance of community pharmacies managing their  
26  
27 339 prescriptions and medications, including the use of dose administration aids (DAAs).

28  
29  
30 340 *So obviously looking at things of whether Webster-paks® or blister packs*  
31  
32 341 *[medication compliance packaging] — pre-made medications — that sort of*  
33  
34 342 *thing as well I think is really important. (P1)*  
35  
36  
37

38 343 However, some participants acknowledged that by relying on an external source there was  
39  
40 344 the potential for error or oversight if they weren't familiar with changes to their medications.

41  
42  
43 345 *I gave my prescriptions actually to the pharmacist. You don't have to think about*  
44  
45 346 *sitting at the table and dividing them all up and hoping that they're not all*  
46  
47 347 *wrong...which has happened a couple of times. I've gone a couple of weeks without*  
48  
49 348 *realising I wasn't taking one particular [medication]. (P18)*  
50  
51  
52

53 349  
54  
55 350 *Engagement with community care*  
56  
57  
58  
59  
60

1  
2  
3 351 Participants who followed through with an appointment to see their GP on discharge  
4  
5 352 indicated the benefit in gaining further understanding of their recent hospitalisation and  
6  
7 353 medication changes, including accessing new prescriptions.  
8  
9

10 354 *I was told to go to my GP a week after which I did yesterday...she reinforced what*  
11  
12  
13 355 *[medications] they had sent me home with. (P11)*  
14  
15

16 356

17  
18 357 Overall, participants reported a wide range of challenges adhering to a medication regime on  
19  
20 358 discharge. Many participants were not supplied with sufficient medication quantities on  
21  
22 359 discharge to see them through to their follow-up GP appointment, who were often required  
23  
24 360 to wait several weeks.  
25  
26

27  
28 361 *...because my GP is booked out that far ahead, I'm looking at two to three weeks.*  
29

30 362 *When I rang up to say that I need an appointment to arrange some medications after I*  
31  
32 363 *had a heart attack, they had to put me on an emergency waiting list, and even then, it*  
33  
34 364 *took them seven days to get me in. (P3)*  
35  
36

37 365

38  
39  
40 366 Participants were reportedly confronted with the concept of taking multiple medications,  
41  
42 367 highlighting their embarrassment and the stigma associated with medication use. Some  
43  
44 368 participants were reluctant to seek pharmacist-led medication management services, such as  
45  
46 369 DAAs, due to its perceived association with advanced age.  
47  
48

49  
50 370 *...going into the pharmacy and just slapping them [the prescriptions] down on the*  
51  
52 371 *counter, it's just going to feel like I'm a walking medication taker! Once I get over the*  
53  
54 372 *initial embarrassment...I'm actually going to be calling them and saying, 'I need to fill*  
55  
56 373 *my medication'. (P7)*  
57  
58  
59  
60

1  
2  
3 374 *And for me, personally, I still consider myself still fairly young, and I think this [DAA]*  
4  
5 375 *is an old person's thing. So, getting your head around it all, you know, it's a little new.*  
6  
7  
8 376 *(P2)*  
9

10  
11 377

12  
13  
14 378 Many participants commented on the benefit of accessing a community pharmacist for  
15  
16 379 medication-related information and health advice prior to escalating any concerns to their GP.

17  
18  
19 380 *I wouldn't go and pick up a multivitamin or something without talking to the chemist*  
20  
21 381 *[pharmacist]: 'this is what I take. Could there be any interactions?' (P12)*  
22

23  
24 382 *Because sometimes it's hard to get into see your GP. And sometimes it's not necessary*  
25  
26 383 *to see your GP. I feel that [the community pharmacist] is the 'first port-of-call'; unless*  
27  
28 384 *you're really, really sick. (P6)*  
29

30  
31  
32 385

33  
34  
35 386 Conversations with a community pharmacist on discharge home provided many participants  
36  
37 387 with the reassurance they needed to better manage their medications. However, some  
38  
39 388 participants reported they were reticent to speak to their community pharmacist due to  
40  
41 389 privacy concerns associated with discussing personal medical information in public or being  
42  
43 390 a burden when the pharmacist was perceived to be "busy". (P11)  
44  
45

46  
47 391 *But what I really hate when I go to the chemist [pharmacy] is...they want to talk to*  
48  
49 392 *you — and there are so many people around... I actually feel uncomfortable talking*  
50  
51 393 *about that in front of other people...it's probably not actually sinking in because*  
52  
53 394 *I'm like 'who's standing behind me, is there someone here that I know' you know?*  
54  
55 395 *And I think that's probably why I didn't know a lot about my medications. (P7)*  
56  
57

58  
59 396  
60

1  
2  
3 397 For some participants, accessing a community pharmacist and pharmacy services centred  
4  
5 398 around medication cost whereby participants would seek multiple pharmacies to obtain the  
6  
7  
8 399 best price for their medications. Participants acknowledged this had potential to impact  
9  
10 400 continuity of care facilitated by seeing the same pharmacist.

11  
12  
13 401 *So, we try to keep costs down where we can...at least by going to that [discount*  
14  
15 402 *pharmacy] kind of thing...but in a way of a relationship, I wouldn't know any of the*  
16  
17 403 *people in there. (P9)*

18  
19  
20  
21 404

### 22 23 405 3. *Perceived benefits of routine Post-Discharge Medication Reviews*

24  
25  
26 406 Most participants acknowledged the importance of taking responsibility for their  
27  
28  
29 407 medications. However, all participants could foresee circumstances where the availability of  
30  
31 408 PDMRs would prove beneficial.

32  
33  
34 409 *I think it [PDMRs] would be really valuable. For me who's never really taken any*  
35  
36 410 *medication, you know, it's all a bit daunting all of a sudden having to take medication.*  
37  
38 411 *(P2)*

39  
40  
41 412 *As a nurse, there a lot of people out there who have no clue what their medication are*  
42  
43 413 *or how they should be working, or when they should be taking them. So, I can see the*  
44  
45 414 *benefits of it — even for myself. (P16)*

46  
47  
48  
49 415

### 50 51 52 416 *Incorporation of Post-Discharge Medication Reviews into Standard of Care*

53  
54  
55 417 Participants reported that PDMR would provide an opportunity for a tailored provision of  
56  
57 418 information. Some participants suggested incorporating a 'triage' system to account for each  
58  
59  
60

1  
2  
3 419 patient's individual social situation and educational needs, along with assessing those who  
4  
5 420 may be at high-risk for medication misadventure.  
6  
7

8 421 *There could be benefits from them [PDMRs] that you don't see until you actually have*  
9  
10 422 *someone come to have a look. I think that you would probably ideally...make contact*  
11  
12 423 *with a person in hospital, so you understand what they're circumstances are. And then*  
13  
14 424 *you could make the decision from there. It's very person orientated. (P12)*  
15  
16

17  
18 425 *...then maybe from that phone call going 'okay you sound really stressed about your*  
19  
20 426 *medication we'll try and squeeze you in tomorrow'...I guess maybe, like, a phone call*  
21  
22 427 *to kinda like "triage" how urgently they need it. (P1)*  
23  
24  
25

26 428

27  
28  
29 429 The option for a PDMR with a pharmacist was perceived as a means of easing the anxiety  
30  
31 430 experienced during and after discharge home. Participants reported that a PDMR would  
32  
33 431 benefit their transition back into a community setting to reinforce information and provide  
34  
35 432 ongoing monitoring, reassurance, and support. Similarly, participants perceived that  
36  
37 433 receiving a PDMR at home gave them time to process their hospitalisation and any changes  
38  
39 434 implemented, which might raise issues to be discussed.  
40  
41

42  
43 435 *And also, when you're in the hospital, you might not be thinking of these things to ask*  
44  
45 436 *either because it's all new and stuff. So, by the time you get home you can all of a*  
46  
47 437 *sudden sit down and sort of absorb the information. (P2)*  
48  
49

50  
51 438 *like you feel quite safe while in hospital. But when you come home, it's a little bit*  
52  
53 439 *daunting. (P6)*  
54  
55

56 440  
57  
58  
59  
60

1  
2  
3 441 Home visitation for a PDMR was also perceived to be more conducive for medication-  
4  
5 442 related education, away from the time pressures experienced in other settings.  
6  
7

8 443 *You're not in the pharmacy with people glaring at you thinking 'hurry, hurry up, get*  
9  
10 444 *out of the way.' And even you're not sitting in the doctor's surgery thinking 'I'm*  
11  
12 445 *getting charged for every 5 minutes I'm sitting here.'* (P9)  
13  
14

15  
16 446 *And when you go to the GP, it's very transactional. Like, it's just like you're in, out.*

17  
18 447 *They're really busy to the point that you don't feel confident that they really listen.*

19  
20 448 (P7)  
21  
22

23  
24 449

## 25 26 450 **Discussion**

### 27 28 29 451 *Summary of main findings*

30  
31  
32 452 Our study explored perspectives of CVD patients on their experiences with medication  
33  
34 453 management and pharmacist-led medication review services during their ToC, including  
35  
36 454 attitudes towards having access to PDMRs. Cardiology patients' ToC following a hospital  
37  
38 455 admission is often associated with a period of vulnerability that may be ameliorated through  
39  
40 456 pharmacist medication reconciliation [34]. Our findings identified that the hospital  
41  
42 457 environment presented several challenges which impacted the effective delivery of education  
43  
44 458 for inpatients. Participants detailed difficulties understanding and retaining medication-  
45  
46 459 related information during admission for a significant health event. Feelings of anxiety and  
47  
48 460 being overwhelmed contributed to poor information retention and meant participants  
49  
50 461 returning home lacking confidence in managing their medications. Despite these feelings,  
51  
52 462 many participants received minimal support through pharmacist-led medication management  
53  
54 463 services across their ToC. Overall, while participants took time to establish a routine back  
55  
56  
57  
58  
59  
60

1  
2  
3 464 home, many gradually became confident and expressed value in a medication review to  
4  
5 465 monitor and provide support upon their return to a community setting.  
6  
7

8 466  
9

10  
11 467 *Comparison with existing literature*  
12

13  
14 468 Existing literature highlights the impact of time pressures on the quality and efficacy of  
15  
16 469 hospital-delivered education for inpatients has been extensively covered in the available  
17  
18 470 evidence base [35-38]. In response patients may be less equipped to manage their  
19  
20 471 medications on discharge to a community setting, thus affecting their quality use of  
21  
22 472 medicines (QUM) — the safe, effective, and appropriate use of medicines — and increasing  
23  
24 473 the risks of future hospitalisations.  
25  
26  
27  
28

29 474  
30

31  
32 475 Obtaining the patient perspective is a critically important phase of implementing new health  
33  
34 476 services. Our results provide the perspectives of CVD patients, thus building on existing  
35  
36 477 literature [39]. For example, White et al (2012) [40] conducted a qualitative study that  
37  
38 478 identified four key benefits of medication reviews as perceived by patients eligible for these  
39  
40 479 reviews: (i) acquisition of personalised medication information and advice; (ii) reassurance  
41  
42 480 regarding medications and coordination of their care; (iii) feeling valued and cared for by a  
43  
44 481 health care provider; (iv) enhancing the patient-provider and pharmacist-GP relationships.  
45  
46 482 Our study mirrors these observations concerning the perceived benefits of PDMRs,  
47  
48 483 particularly the need for post-discharge follow-up and the reassurance that patients  
49  
50 484 experience when receiving pharmacist input into their care.  
51  
52  
53

54  
55 485  
56  
57  
58  
59  
60

1  
2  
3 486 However, the White et al study identified patient concerns around the potential for  
4  
5 487 pharmacist medication reviews to be perceived as undermining the authority of the GP, thus  
6  
7 488 having a negative impact on the patient's relationship with their GP [40]. Participants in our  
8  
9 489 study did not share these same perspectives, and instead felt that PDMRs would have  
10  
11 490 potential to improve access to primary care post-discharge through pharmacists due to  
12  
13 491 difficulties experienced with accessing their GPs. Our study demonstrated PDMRs were  
14  
15 492 considered an opportunity to ask questions and more actively engage in education within the  
16  
17 493 security of their own home. We posit that PDMRs have the potential to bridge education  
18  
19 494 deficits that emerge on discharge home and promote communication between hospital and  
20  
21 495 community-based medical practitioners.  
22  
23  
24  
25  
26  
27 496

28  
29 497 The timing of service provision is crucial to ensure that QUM is maintained, and the risk of  
30  
31 498 medication-related problems is minimised. Evidence detailing the incidence of medication-  
32  
33 499 related problems ranges from 18.4% two-weeks post-discharge through to 37.5% four weeks  
34  
35 500 post-discharge [41]. Recently, Daliri et al demonstrated that pharmacy-led transitional care  
36  
37 501 education programs reduced the proportion of patients experiencing self-reported  
38  
39 502 medication-related problems four-weeks post discharge [42]. Participants in our study  
40  
41 503 highlighted their desire for early pharmacist follow-up, within the first seven days post-  
42  
43 504 discharge being the most common request. This demonstrates the importance of early post-  
44  
45 505 discharge follow-up to promote the safe and effective use of medicines for ToC patients.  
46  
47  
48  
49  
50

51 506  
52  
53  
54 507 Participants in the study experienced issues engaging with primary care once discharged  
55  
56 508 from hospital, with potential role for pharmacists to bridge this gap. GP access for  
57  
58 509 prescription resupply was the most common challenge experienced by participants when  
59  
60



1  
2  
3 510 returning home. The limited quantities of tablets provided to participants at the time of  
4  
5 511 discharge was sometimes insufficient to sustain them until their GP appointment. The  
6  
7 512 HNELHD is part of the New South Wales (NSW) public health system which stipulates that  
8  
9 513 take home supplies of regular medications must not exceed 7 days' supply when discharged  
10  
11 514 from hospital [43]. Unfortunately, this restriction imposes significant challenges for patients  
12  
13 515 discharged from NSW public hospitals. This varies considerably to other states within  
14  
15 516 Australia — for example, both Queensland and Victorian public hospital networks allow a  
16  
17 517 one-month supply of regular medications under the Pharmaceutical Benefits Scheme [44,  
18  
19 518 45]. Given that access to a GP may be difficult on discharge due to lengthy wait times, we  
20  
21 519 advocate that pharmacists may in fact play an important role in ensuring the continuity of  
22  
23 520 care and appropriate access to medications through the incorporation of a PDMR as standard  
24  
25 521 of care for ToC patients.  
26  
27  
28  
29  
30  
31  
32  
33

### 34 523 *Strengths, Limitations, and Implications on future research and practice*

35  
36  
37 524 The strength of this study lies in the exploration of a heterogenous sample of cardiology  
38  
39 525 patients. A diverse cohort of participants was purposively selected to capture the broadest  
40  
41 526 range of perspectives possible. Furthermore, the inductive thematic analysis approach used in  
42  
43 527 this study enables the richness of the qualitative data to be captured through a more flexible  
44  
45 528 and reflective process. This method aims to remove a researcher's analytic preconceptions,  
46  
47 529 ensuring thematic analysis is data-driven rather than researcher-driven. We acknowledge that  
48  
49 530 many patients were reflecting on the prospect of a PDMR across their ToC rather than having  
50  
51 531 received one. A limitation of this study includes the potential for reporting bias. It is possible  
52  
53 532 that ToC CVD patients who engaged with the study may in fact have a differing experience  
54  
55 533 with pharmacist-led medication management services compared to those who did not  
56  
57  
58  
59  
60

1  
2  
3 534 participate. The relatively young mean age of participants (57.5 years of age) may also not  
4  
5 535 accurately reflect the views and experiences of ‘older’ adult patients (over the age of 65  
6  
7 536 years) surrounding their need for pharmacist-led medication management services. It is well-  
8  
9 537 documented that patients living outside major Australian capital cities have poorer health  
10  
11 538 outcomes [46]. Our study recruited patients who predominantly live outside major capital city  
12  
13 539 area(s) of Australia. Hence, their inclusion may therefore represent unique health outcome  
14  
15 540 challenges associated with their geographic location. Our results provide a baseline  
16  
17 541 understanding of the perspectives of ToC CVD patients in terms of the implementation of  
18  
19 542 PDMRs. Future research is needed to evaluate the clinical benefit of routine PDMRs for  
20  
21 543 CVD patients to investigate the acceptability of the service, but also its impact on key CVD  
22  
23 544 outcome markers, including 30-day hospital readmission rates and the incidence of major  
24  
25 545 adverse cardiovascular events. In addition, future research should explore the perspectives of  
26  
27 546 other population groups and their engagement with pharmacist-led medication management  
28  
29 547 services. This may include the perspectives of patients who are not immediately engaged with  
30  
31 548 the hospital system, along with cultural and linguistically diverse patients and those residing  
32  
33 549 in regional, rural, and remote localities.  
34  
35  
36  
37  
38  
39  
40  
41  
42  
43

550

## 551 **Conclusion**

552 Pharmacists are ideally positioned to assist CVD patients across their ToC journeys as part of  
553 a broader MDT. PDMRs are viewed by ToC CVD patients as an acceptable means of  
554 improving their health literacy and QUM when transitioning from hospital back home.  
555 However, our study indicates that patients with CVD do not frequently engage with  
556 pharmacist-led medication management services during their ToC. Routine service  
557 implementation may address the patient’s desire for post-discharge follow-up and provision  
558  
559  
560

1  
2  
3 558 for education away from the busy hospital environment. Service implementation may benefit  
4  
5 559 from an initial 'triage' to individualise the delivery by assessing the patient's own needs and  
6  
7 560 expectations of the service, whilst screening for those who may be at high-risk of medication  
8  
9 561 misadventure.  
10  
11  
12

13 562  
14  
15

## 16 563 **Acknowledgements**

17  
18  
19  
20 564 The authors would like to thank the participants for their time and willingness to partake in  
21  
22 565 the interviews.  
23  
24

25 566  
26  
27

## 28 567 **Author Contributions**

29  
30  
31 568 Study design was conducted by JB, HC, JC, JW, and DN. Recruitment was conducted by JB,  
32  
33 569 DM, NE, and MA. Interviews and interview transcription was performed by JB. Data  
34  
35 570 analysis was completed by JB and JW. JB drafted the manuscript for publication and DN,  
36  
37 571 AS, HC, JW and JC contributed to the content and revision of the manuscript. Revisions,  
38  
39 572 literature, and manuscript checking was managed by JB. All authors read and approved the  
40  
41 573 final version.  
42  
43  
44

45 574  
46  
47

## 48 575 **Funding**

49  
50  
51  
52 576 J Bennetts is the recipient of an Australian Government Research Training Program  
53  
54 577 Scholarship (University of Newcastle Vice-Chancellor's Scholarship) and would like to thank  
55  
56 578 the Commonwealth of Australia for their financial contribution to this research (Award ID  
57  
58 579 not assigned). AL Sverdlov is supported by Heart Foundation Australia Future Leader  
59  
60

1  
2  
3 580 Fellowships (Award IDs 101918 & 106025). DTM Ngo is supported by the NSW Ministry of  
4  
5 581 Health EMC Fellowship, Australia (Grant ID G1701368) and Heart Foundation Australia  
6  
7 582 Future Leader Fellowship (Award ID 104814). This work is supported in part by the Piggotts  
8  
9 583 Family Trust from the Hunter Medical Research Institute (DTMN, JB; Grant ID G2100856);  
10  
11 584 Royal Australasian College of Physicians (RACP) Foundation Research Establishment  
12  
13 585 Awards (ALS; Grant ID G1801367); NSW Ministry of Health Translational Research Grant  
14  
15 586 (ALS; Grant ID G1901542) and 2022 John Hunter Hospital Charitable Trust Grant (ALS, JB;  
16  
17 587 Grant ID G2200585).  
18  
19  
20  
21  
22  
23  
24  
25

### 26 589 **Ethics approval and consent to participate**

27  
28  
29 590 Ethics approval was received from Hunter New England Human Research Ethics Committee  
30  
31 591 of HNELHD (Reference – 2022/ETH00872). All participants provided written informed  
32  
33 592 consent prior to conducting interviews.  
34  
35  
36  
37  
38  
39

### 40 594 **Competing interests**

41  
42  
43 595 JB is a credentialed pharmacist who can provide domiciliary medication management  
44  
45 596 reviews funded by the Australian Government Department of Health and Aged Care.  
46  
47  
48  
49

### 50 598 **Data Availability Statement**

51  
52  
53 599 All data relevant to the study was included either in the manuscript or as supplementary  
54  
55 600 material. Selected anonymised qualitative interview data may be made available upon  
56  
57 601 request.  
58  
59  
60

602

603 **References**

- 604 1. Health Ato, Welfare. Heart, stroke and vascular disease: Australian facts. Canberra: AIHW; 2023.
- 605 2. Abolbashari M, Macaulay TE, Whayne TF, Mukherjee D, Saha S. Polypharmacy in cardiovascular  
606 medicine: problems and promises! *Cardiovascular & Hematological Agents in Medicinal Chemistry*  
607 (Formerly *Current Medicinal Chemistry-Cardiovascular & Hematological Agents*). 2017;15(1):31-9.
- 608 3. Mixon AS, Myers AP, Leak CL, Lou Jacobsen JM, Cawthon C, Goggins KM, et al. Characteristics  
609 associated with postdischarge medication errors. *Mayo Clin Proc*. 2014;89(8):1042-51.
- 610 4. Organization WH. Medication without harm. World Health Organization; 2017.
- 611 5. Mastromarino V, Casenghi M, Testa M, Gabriele E, Coluccia R, Rubattu S, et al. Polypharmacy in  
612 heart failure patients. *Current heart failure reports*. 2014;11(2):212-9.
- 613 6. Formiga F, Chivite D, Manito N, Casas S, Llopis F, Pujol R. Hospitalization due to acute heart  
614 failure. Role of the precipitating factors. *Int J Cardiol*. 2007;120(2):237-41.
- 615 7. Kim S, Shin DW, Yun JM, Hwang Y, Park SK, Ko YJ, et al. Medication Adherence and the Risk of  
616 Cardiovascular Mortality and Hospitalization Among Patients With Newly Prescribed  
617 Antihypertensive Medications. *Hypertension*. 2016;67(3):506-12.
- 618 8. Mekonnen AB, McLachlan AJ, Jo-anne EB. Effectiveness of pharmacist-led medication  
619 reconciliation programmes on clinical outcomes at hospital transitions: a systematic review and  
620 meta-analysis. *BMJ open*. 2016;6(2):e010003.
- 621 9. Ramalho de Oliveira D, Brummel AR, Miller DB. Medication therapy management: 10 years of  
622 experience in a large integrated health care system. *Journal of Managed Care Pharmacy*.  
623 2010;16(3):185-95.
- 624 10. Lee E, Braund R, Tordoff J. Examining the first year of Medicines Use Review services provided by  
625 pharmacists in New Zealand: 2008. *The New Zealand Medical Journal (Online)*. 2009;122(1293).
- 626 11. Blenkinsopp A, Bond C, Raynor DK. Medication reviews. *British journal of clinical pharmacology*.  
627 2012;74(4):573-80.
- 628 12. Chen TF. Pharmacist-led home medicines review and residential medication management review:  
629 the Australian model. *Drugs & aging*. 2016;33(3):199-204.
- 630 13. Renaudin P, Boyer L, Esteve MA, Bertault-Peres P, Auquier P, Honore S. Do pharmacist-led  
631 medication reviews in hospitals help reduce hospital readmissions? A systematic review and  
632 meta-analysis. *British journal of clinical pharmacology*. 2016;82(6):1660-73.
- 633 14. Burgess LH, Kramer J, Castelein C, Parra JM, Timmons V, Pickens S, et al. Pharmacy-Led  
634 Medication Reconciliation Program Reduces Adverse Drug Events and Improves Satisfaction in a  
635 Community Hospital. *HCA Healthc J Med*. 2021;2(6):411-21.
- 636 15. Abdulghani KH, Aseeri MA, Mahmoud A, Abulezz R. The impact of pharmacist-led medication  
637 reconciliation during admission at tertiary care hospital. *International Journal of Clinical Pharmacy*.  
638 2018;40(1):196-201.
- 639 16. Kramer J, Hayley Burgess L, Warren C, Schlosser M, Fraker S, Hamilton M. Impact of pharmacist-  
640 led admission medication reconciliation on patient outcomes in a large health system. *Journal of*  
641 *Patient Safety and Risk Management*. 2023;0(0):25160435231193584.
- 642 17. Tan JP, Cheng KKF, Siah RCJ. A systematic review and meta-analysis on the effectiveness of  
643 education on medication adherence for patients with hypertension, hyperlipidaemia and diabetes.  
644 *Journal of advanced nursing*. 2019;75(11):2478-94.
- 645 18. Pharmaceutical Society of Australia. Guidelines for pharmacists providing Residential Medication  
646 Management Review (RMMR) and Quality Use of Medicines (QUM) services. 2011.
- 647 19. Australian Government. Third Community Pharmacy Agreement between The Commonwealth of  
648 Australia and The Pharmacy Guild of Australia. In: Department of Health and Aged Care, editor.:  
649 Commonwealth of Australia; 2000.

- 1  
2  
3 650 20. Petra C, Laetitia H, Sim TF, Parsons R, Wright B, Sunderland B. Home medicines reviews and  
4 651 residential medication management reviews in Western Australia. *International journal of clinical*  
5 652 *pharmacy*. 2020;42(2):567-78.
- 6 653 21. Weir KR, Naganathan V, Bonner C, McCaffery K, Rigby D, McLachlan AJ, et al. Pharmacists' and  
7 654 older adults' perspectives on the benefits and barriers of Home Medicines Reviews—a qualitative  
8 655 study. *Journal of health services research & policy*. 2020;25(2):77-85.
- 9 656 22. Weir KR, Naganathan V, Rigby D, McCaffery K, Bonner C, Trevena L, et al. Home medicines  
10 657 reviews: a qualitative study of GPs' experiences. *Australian journal of primary health*. 2020;26(1):24-  
11 658 30.
- 12 659 23. Patounas M, Lau ET, Chan V, Rigby D, Kyle GJ, Khatri J, et al. Home medicines reviews: a national  
13 660 survey of Australian accredited pharmacists' health service time investment. *Pharmacy practice*.  
14 661 2021;19(3).
- 15 662 24. Spinks J, Birch S, Wheeler AJ, Nissen L, Freeman C, Thai T, et al. Provision of home medicines  
16 663 reviews in Australia: linking population need with service provision and available pharmacist  
17 664 workforce. *Australian Health Review*. 2020;44(6):973-82.
- 18 665 25. Angley M, Criddle D, Rigby D, Elliott RA, Phillips K, Penm J, et al. Hospital-initiated post-discharge  
19 666 medication reviews in Australia: expert opinion on the barriers and enablers to implementation.  
20 667 *Journal of Pharmacy Practice and Research*. 2022;52(6):446-53.
- 21 668 26. Cawthon C, Walia S, Osborn CY, Niesner KJ, Schnipper JL, Kripalani S. Improving Care Transitions:  
22 669 The Patient Perspective. *Journal of Health Communication*. 2012;17(sup3):312-24.
- 23 670 27. Parajuli DR, Franzon J, McKinnon RA, Shakib S, Clark RA. Role of the pharmacist for improving  
24 671 self-care and outcomes in heart failure. *Current heart failure reports*. 2017;14:78-86.
- 25 672 28. Australian Chronic Disease Prevention Alliance. Australian Guideline for assessing and managing  
26 673 cardiovascular disease risk In: Australian Government Department of Health and Aged Care, editor.  
27 674 Canberra, ACT: Commonwealth of Australia; 2023.
- 28 675 29. Pharmacy Programs Administrator. Medication Management Programs [cited 2021 Sep 02].  
29 676 Available from: <https://www.ppaonline.com.au/programs/medication-management-programs>.
- 30 677 30. Tong A, Sainsbury P, Craig J. Consolidated criteria for reporting qualitative research (COREQ): a  
31 678 32-item checklist for interviews and focus groups. *International journal for quality in health care*.  
32 679 2007;19(6):349-57.
- 33 680 31. Braun V, Clarke V. Using thematic analysis in psychology. *Qualitative research in psychology*.  
34 681 2006;3(2):77-101.
- 35 682 32. Krefting L. Rigor in qualitative research: the assessment of trustworthiness. *Am J Occup Ther*.  
36 683 1991;45(3):214-22.
- 37 684 33. Pandit NR. The creation of theory: A recent application of the grounded theory method. *The*  
38 685 *qualitative report*. 1996;2(4):1-15.
- 39 686 34. Al Sattouf A, Farahat R, Khatri AA. Effectiveness of Transitional Care Interventions for Heart  
40 687 Failure Patients: A Systematic Review With Meta-Analysis. *Cureus*. 2022;14(9):e29726.
- 41 688 35. Deccache A, Aujoulat I. A European perspective: common developments, differences and  
42 689 challenges in patient education. *Patient Education and Counseling*. 2001;44(1):7-14.
- 43 690 36. Badiyepymaiejahromi Z, Isfahani S, Parandavar N, Koshkaki A. Nursing students' perspectives  
44 691 regarding challenges of patient education in clinical settings. *Bangladesh Journal of Medical Science*.  
45 692 2016;15:615-20.
- 46 693 37. Tsigas E, Panagopoulou E, Sevdalis N, Montgomery A, Benos A. The influence of time pressure on  
47 694 adherence to guidelines in primary care: an experimental study. *BMJ open*. 2013;3(4):e002700.
- 48 695 38. Cooper JM, Garrett T. Providing medicines information and education to hospital in-patients:  
49 696 patients' experiences and preferences. *Journal of Pharmacy Practice and Research*. 2014;44(4):213-  
50 697 9.
- 51 698 39. Australian Commission on Safety and Quality in Health Care. Patient-centred care: Improving  
52 699 quality and safety through partnerships with patients and consumers. Sydney: Australian  
53 700 Commission on Safety and Quality in Health Care,; 2011.

- 1  
2  
3 701 40. White L, Klinner C, Carter S. Consumer perspectives of the Australian Home Medicines Review  
4 702 Program: Benefits and barriers. *Research in Social and Administrative Pharmacy*. 2012;8(1):4-16.  
5 703 41. Garcia-Caballo M, Ramos-Diaz F, Jimenez-Moleon JJ, Bueno-Cavanillas A. Drug-related problems  
6 704 in older people after hospital discharge and interventions to reduce them. *Age and ageing*.  
7 705 2010;39(4):430-8.  
8 706 42. Daliri S, Hugtenburg JG, ter Riet G, van den Bemt BJF, Buurman BM, Scholte op Reimer WJM, et  
9 707 al. The effect of a pharmacy-led transitional care program on medication-related problems post-  
10 708 discharge: A before—After prospective study. *PLOS ONE*. 2019;14(3):e0213593.  
11 709 43. NSW Government. Medication Handling In: NSW Health, editor. St Leonards, New South Wales:  
12 710 NSW Government; 2022.  
13 711 44. Queensland Government. Commonwealth funding of medicines Brisbane, QLD: Queensland  
14 712 Health,; 2019 [cited 2023 20 Oct]. Available from: [https://www.health.qld.gov.au/clinical-  
15 713 practice/guidelines-procedures/medicines/commonwealth-funding](https://www.health.qld.gov.au/clinical-practice/guidelines-procedures/medicines/commonwealth-funding).  
16 714 45. Victorian Government Department of Health. Pharmaceutical Benefits Scheme in Victoria's public  
17 715 hospitals 2015 [cited 2023 20 Oct]. Available from: [https://www.health.vic.gov.au/patient-  
18 716 care/pharmaceutical-benefits-scheme-in-victorias-public-hospitals](https://www.health.vic.gov.au/patient-care/pharmaceutical-benefits-scheme-in-victorias-public-hospitals).  
19 717 46. Health Ato, Welfare. Rural and remote health. Canberra: AIHW; 2023.

20  
21  
22  
23 718

24  
25 719 **Figure 1: Inclusion and Exclusion**

26  
27 720

28  
29 721 **Figure 2: Demographics of Interviewed Cardiovascular Disease Patients.**

30 722 STEMI: ST-elevated myocardial infarction; NSTEMI: non-ST-elevated myocardial  
31 723 infarction; HFrEF: heart failure with reduced ejection fraction; HFpEF: heart failure with  
32 724 preserved ejection fraction.

33  
34 725 Regular Medications at Discharge denotes medications taken daily by patient (excludes  
35 726 'when required' or 'pro re nata' (PRN) medications).

36  
37 727 Number of comorbidities according to patient's hospital discharge paperwork.  
38  
39  
40  
41  
42  
43  
44  
45  
46  
47  
48  
49  
50  
51  
52  
53  
54  
55  
56  
57  
58  
59  
60

**Figure 1: Inclusion and Exclusion Criteria****Inclusion Criteria**

Over 18 years of age

Discharged from *John Hunter Hospital* into a community setting

Pre-existing or newly diagnosed cardiovascular disease, or are considered high-risk for the development of cardiovascular disease using the *CVDCHECK* online tool [28]

Can provide written or verbal informed consent in the presence of a witness

Can participate in a telephone interview

**Exclusion Criteria**

Not considered high-risk for development of CVD (as defined previously) AND are not currently diagnosed with CVD

Discharged to a residential aged care facility where medications are managed according to local facility protocols

Are not eligible to receive an Australian comprehensive medication review service as outlined by the *Pharmacy Programs Administrator Program Rules* [29]

Have significant cognitive impairment and cannot participate in a semi-structured interview

Receiving palliative care and participation in the interview will incur foreseeable challenges



| Participant Characteristics                        |                         | <i>n</i> , (%) |
|----------------------------------------------------|-------------------------|----------------|
| <b>Age</b>                                         |                         |                |
|                                                    | 30–39                   | 2 (12.5)       |
|                                                    | 40–49                   | 3 (19)         |
|                                                    | 50–59                   | 5 (31)         |
|                                                    | 60–69                   | 2 (12.5)       |
|                                                    | 70–79                   | 4 (25)         |
| <b>Gender</b>                                      |                         |                |
|                                                    | Male                    | 9 (56)         |
|                                                    | Female                  | 7 (44)         |
| <b>Diagnosis</b>                                   |                         |                |
|                                                    | STEMI                   | 5 (31)         |
|                                                    | NSTEMI                  | 5 (31)         |
|                                                    | Ischaemic Heart Disease | 1 (6)          |
|                                                    | HFrEF                   | 1 (6)          |
|                                                    | HFpEF                   | 3 (19)         |
|                                                    | Infective Endocarditis  | 1 (6)          |
| <b>Regular Prescribed Medications at Discharge</b> |                         |                |
|                                                    | 1–4                     | 2 (13)         |
|                                                    | 5–9                     | 8 (50)         |
|                                                    | 10–14                   | 5 (31)         |
|                                                    | 15–19                   | 0 (0)          |
|                                                    | 20+                     | 1 (6)          |
| <b>Number of Comorbidities</b>                     |                         |                |
|                                                    | Zero                    | 3 (19)         |
|                                                    | 1–4                     | 7 (44)         |
|                                                    | 5–9                     | 5 (31)         |
|                                                    | 10+                     | 1 (6)          |

**Figure 2:** Demographics of Interviewed Cardiovascular Disease Patients.

STEMI: ST-elevated myocardial infarction; NSTEMI: non-ST-elevated myocardial infarction; HFrEF: heart failure with reduced ejection fraction; HFpEF: heart failure with preserved ejection fraction.

Regular Medications at Discharge denotes medications taken daily by patient (excludes 'when required' or 'pro re nata' (PRN) medications).

Number of comorbidities according to patient's hospital discharge paperwork.

1  
2  
3  
4  
5  
6  
7  
8  
9

## ***Patient Perspectives of Pharmacist-Provided Medication Reviews***

### ***Semi-Structured Interview Questions***

10  
11  
12  
**Research Question:** what are the current experiences of high-risk cardiovascular disease patients with pharmacist-led medication reviews following discharge from hospital?

13  
14  
15  
**Aim:** To investigate the current model of medication review provision for high-risk cardiovascular disease patients upon discharge from hospital.

16  
17  
18  
19  
***General Introduction to Commence Interview:***

- 20 • Interviewer introduction and salutation
- 21 • Brief explanation of the purpose of the interviews and study
- 22 • Provide overview of interview format including the freedom to refuse response
- 23 provision and requesting breaks at any stage; advise that interview will be audio-
- 24 recorded
- 25 • Request verbal consent to proceed
- 26
- 27
- 28

29  
30  
***Current Medication Management of Patient***

- 31 1. Can you describe to me how you currently manage your medicines at home?
- 32 2. How many medicines are you taking (including any complimentary and non-oral
- 33 formulations)?
- 34 3. After your recent visit to hospital, how comfortable do you feel managing your
- 35 medicines?
- 36 4. Since your visit to hospital, how has your need to visit a pharmacy or speak with a
- 37 pharmacist changed?
- 38
- 39
- 40
- 41
- 42

43  
44  
***Patient Perceptions of Pharmacist Medication Management***

- 45 5. What role do you think pharmacists have in supporting you in your day-to-day
- 46 management of your medicines?
- 47 6. What interactions do you have with your regular pharmacist/pharmacy?
- 48 7. What is your understanding of medication reviews performed by a pharmacist?
- 49
- 50
- 51
- 52

53  
54  
***Previous Experiences with Medication Reviews***

- 55 8. Have you ever sat down in a pharmacy to chat with the pharmacist about your
- 56 medicines?
- 57 9. Has a pharmacist ever come out to your home to review your medicines?
- 58 10. What medicines review services have been offered to you?
- 59
- 60

1  
2  
3  
4  
5  
6  
7  
8  
9  
10  
11  
12  
13  
14  
15  
16  
17  
18  
19  
20  
21  
22  
23  
24  
25  
26  
27  
28  
29  
30  
31  
32  
33  
34  
35  
36  
37  
38  
39  
40  
41  
42  
43  
44  
45  
46  
47  
48  
49  
50  
51  
52  
53  
54  
55  
56  
57  
58  
59  
60

***Prospective Engagement with Pharmacists for Medication Reviews***

11. What medication management help was provided to you while you were in hospital?  
Who provided you this help?
  12. What medication management help has been provided to you since leaving hospital?  
Who provided you this help?
  13. Think back now to the days and weeks since leaving hospital. During this time, when  
would be the most appropriate time for a pharmacist to help manage your  
medicines?
  14. How comfortable do you feel about a pharmacist coming to your home to review  
your medicines?
  15. Tell us how a pharmacist can help with your day-to-day medicines management?
- For peer review only

## COREQ (COnsolidated criteria for REporting Qualitative research) Checklist

A checklist of items that should be included in reports of qualitative research. You must report the page number in your manuscript where you consider each of the items listed in this checklist. If you have not included this information, either revise your manuscript accordingly before submitting or note N/A.

| Topic                                          | Item No. | Guide Questions/Description                                                                                                                              | Reported on Page No. |
|------------------------------------------------|----------|----------------------------------------------------------------------------------------------------------------------------------------------------------|----------------------|
| <b>Domain 1: Research team and reflexivity</b> |          |                                                                                                                                                          |                      |
| <i>Personal characteristics</i>                |          |                                                                                                                                                          |                      |
| Interviewer/facilitator                        | 1        | Which author/s conducted the interview or focus group?                                                                                                   |                      |
| Credentials                                    | 2        | What were the researcher's credentials? E.g. PhD, MD                                                                                                     |                      |
| Occupation                                     | 3        | What was their occupation at the time of the study?                                                                                                      |                      |
| Gender                                         | 4        | Was the researcher male or female?                                                                                                                       |                      |
| Experience and training                        | 5        | What experience or training did the researcher have?                                                                                                     |                      |
| <i>Relationship with participants</i>          |          |                                                                                                                                                          |                      |
| Relationship established                       | 6        | Was a relationship established prior to study commencement?                                                                                              |                      |
| Participant knowledge of the interviewer       | 7        | What did the participants know about the researcher? e.g. personal goals, reasons for doing the research                                                 |                      |
| Interviewer characteristics                    | 8        | What characteristics were reported about the interviewer/facilitator? e.g. Bias, assumptions, reasons and interests in the research topic                |                      |
| <b>Domain 2: Study design</b>                  |          |                                                                                                                                                          |                      |
| <i>Theoretical framework</i>                   |          |                                                                                                                                                          |                      |
| Methodological orientation and Theory          | 9        | What methodological orientation was stated to underpin the study? e.g. grounded theory, discourse analysis, ethnography, phenomenology, content analysis |                      |
| <i>Participant selection</i>                   |          |                                                                                                                                                          |                      |
| Sampling                                       | 10       | How were participants selected? e.g. purposive, convenience, consecutive, snowball                                                                       |                      |
| Method of approach                             | 11       | How were participants approached? e.g. face-to-face, telephone, mail, email                                                                              |                      |
| Sample size                                    | 12       | How many participants were in the study?                                                                                                                 |                      |
| Non-participation                              | 13       | How many people refused to participate or dropped out? Reasons?                                                                                          |                      |
| <i>Setting</i>                                 |          |                                                                                                                                                          |                      |
| Setting of data collection                     | 14       | Where was the data collected? e.g. home, clinic, workplace                                                                                               |                      |
| Presence of non-participants                   | 15       | Was anyone else present besides the participants and researchers?                                                                                        |                      |
| Description of sample                          | 16       | What are the important characteristics of the sample? e.g. demographic data, date                                                                        |                      |
| <i>Data collection</i>                         |          |                                                                                                                                                          |                      |
| Interview guide                                | 17       | Were questions, prompts, guides provided by the authors? Was it pilot tested?                                                                            |                      |
| Repeat interviews                              | 18       | Were repeat interviews carried out? If yes, how many?                                                                                                    |                      |
| Audio/visual recording                         | 19       | Did the research use audio or visual recording to collect the data?                                                                                      |                      |
| Field notes                                    | 20       | Were field notes made during and/or after the interview or focus group?                                                                                  |                      |
| Duration                                       | 21       | What was the duration of the interviews or focus group?                                                                                                  |                      |
| Data saturation                                | 22       | Was data saturation discussed?                                                                                                                           |                      |
| Transcripts returned                           | 23       | Were transcripts returned to participants for comment and/or                                                                                             |                      |

| Topic                                  | Item No. | Guide Questions/Description                                                                                                        | Reported on Page No. |
|----------------------------------------|----------|------------------------------------------------------------------------------------------------------------------------------------|----------------------|
|                                        |          | correction?                                                                                                                        |                      |
| <b>Domain 3: analysis and findings</b> |          |                                                                                                                                    |                      |
| <i>Data analysis</i>                   |          |                                                                                                                                    |                      |
| Number of data coders                  | 24       | How many data coders coded the data?                                                                                               |                      |
| Description of the coding tree         | 25       | Did authors provide a description of the coding tree?                                                                              |                      |
| Derivation of themes                   | 26       | Were themes identified in advance or derived from the data?                                                                        |                      |
| Software                               | 27       | What software, if applicable, was used to manage the data?                                                                         |                      |
| Participant checking                   | 28       | Did participants provide feedback on the findings?                                                                                 |                      |
| <i>Reporting</i>                       |          |                                                                                                                                    |                      |
| Quotations presented                   | 29       | Were participant quotations presented to illustrate the themes/findings?<br>Was each quotation identified? e.g. participant number |                      |
| Data and findings consistent           | 30       | Was there consistency between the data presented and the findings?                                                                 |                      |
| Clarity of major themes                | 31       | Were major themes clearly presented in the findings?                                                                               |                      |
| Clarity of minor themes                | 32       | Is there a description of diverse cases or discussion of minor themes?                                                             |                      |

Developed from: Tong A, Sainsbury P, Craig J. Consolidated criteria for reporting qualitative research (COREQ): a 32-item checklist for interviews and focus groups. *International Journal for Quality in Health Care*. 2007. Volume 19, Number 6: pp. 349 – 357

**Once you have completed this checklist, please save a copy and upload it as part of your submission. DO NOT include this checklist as part of the main manuscript document. It must be uploaded as a separate file.**
