# Supplementary material for: Pharmacist-led medication management services: a qualitative exploration of transition-of-care cardiovascular disease patient experiences
Source: PubMed Central journal article supplement — BMJ Open. 2024 May 22;14(5):e082228. doi: 10.1136/bmjopen-2023-082228 (PMC11116877; doi:10.1136/bmjopen-2023-082228), 2024-05-22
Supplement: bmjopen-2023-082228supp001.pdf [file bmjopen-2023-082228supp001.pdf]

## ***Patient Perspectives of Pharmacist-Provided Medication Reviews***

### ***Semi-Structured Interview Questions***

**Research Question:** what are the current experiences of high-risk cardiovascular disease patients with pharmacist-led medication reviews following discharge from hospital?

**Aim:** To investigate the current model of medication review provision for high-risk cardiovascular disease patients upon discharge from hospital.

#### *General Introduction to Commence Interview:*

- Interviewer introduction and salutation
- Brief explanation of the purpose of the interviews and study
- Provide overview of interview format including the freedom to refuse response provision and requesting breaks at any stage; advise that interview will be audio-recorded
- Request verbal consent to proceed

#### ***Current Medication Management of Patient***

1. Can you describe to me how you currently manage your medicines at home?
2. How many medicines are you taking (including any complimentary and non-oral formulations)?
3. After your recent visit to hospital, how comfortable do you feel managing your medicines?
4. Since your visit to hospital, how has your need to visit a pharmacy or speak with a pharmacist changed?

#### ***Patient Perceptions of Pharmacist Medication Management***

5. What role do you think pharmacists have in supporting you in your day-to-day management of your medicines?
6. What interactions do you have with your regular pharmacist/pharmacy?
7. What is your understanding of medication reviews performed by a pharmacist?

#### ***Previous Experiences with Medication Reviews***

8. Have you ever sat down in a pharmacy to chat with the pharmacist about your medicines?
9. Has a pharmacist ever come out to your home to review your medicines?
10. What medicines review services have been offered to you?

***Prospective Engagement with Pharmacists for Medication Reviews***

11. What medication management help was provided to you while you were in hospital?  
Who provided you this help?
12. What medication management help has been provided to you since leaving hospital?  
Who provided you this help?
13. Think back now to the days and weeks since leaving hospital. During this time, when would be the most appropriate time for a pharmacist to help manage your medicines?
14. How comfortable do you feel about a pharmacist coming to your home to review your medicines?
15. Tell us how a pharmacist can help with your day-to-day medicines management?
